# Supplementary material for: The alternative regenerative strategy of bearded dragon unveils the key processes underlying vertebrate tooth renewal
Source: eLife journal article supplement (doi:10.7554/elife.47702), 2019-08-16
Supplement: supp [file elife-47702-supp-v1.zip]

|                   |                  | <b><math>\Delta</math>Ct (Gene-<i>ACTB</i>)</b> |                    |                    |                     |                     |
|-------------------|------------------|-------------------------------------------------|--------------------|--------------------|---------------------|---------------------|
|                   | <b>Replicate</b> | <b><i>ALX1</i></b>                              | <b><i>SIX3</i></b> | <b><i>ISL1</i></b> | <b><i>FOXI1</i></b> | <b><i>BARX1</i></b> |
| <b>Pleurodont</b> | <b>1</b>         | 4,09                                            | 6,67               | 7,02               | 13,88               | 6,87                |
|                   | <b>2</b>         | 4,01                                            | 8,15               | 6,78               | 13,46               | 7,34                |
|                   | <b>3</b>         | 4,29                                            | 8,17               | 6,83               | 13,37               | 8,03                |
| <b>Acrodon</b>    | <b>1</b>         | 8,40                                            | 10,84              | 9,22               | 9,54                | 6,64                |
|                   | <b>2</b>         | 8,72                                            | 11,65              | 9,76               | 10,71               | 5,98                |
|                   | <b>3</b>         | 7,65                                            | 11,22              | 10,05              | 9,70                | 7,26                |
