# Supplementary material for: The alternative regenerative strategy of bearded dragon unveils the key processes underlying vertebrate tooth renewal
Source: eLife journal article supplement (doi:10.7554/elife.47702), 2019-08-16
Supplement: supp [file elife-47702-supp-v1.zip]

|            |           | Absolute mean BrdU+/PCNA+ counts |             | Relative BrdU+/PCNA+ cell amounts per tooth region (I,II,III,IV) |         |         |         |          |         |         |         |
|------------|-----------|----------------------------------|-------------|------------------------------------------------------------------|---------|---------|---------|----------|---------|---------|---------|
|            |           | Pleurodont                       | Acrodont    | Pleurodont                                                       |         |         |         | Acrodont |         |         |         |
| Time point | Replicate | All regions                      | All regions | I                                                                | II      | III     | IV      | I        | II      | III     | IV      |
| d0         | 1         | 69,75                            | 141,5       | 0,26957                                                          | 0,16232 | 0,1913  | 0,37681 | 0,26626  | 0,2292  | 0,23828 | 0,26626 |
|            | 2         | 100,5714286                      | 83          | 0,2847                                                           | 0,28266 | 0,34796 | 0,08469 | 0,34571  | 0,15968 | 0,23564 | 0,2589  |
|            | 3         | 73,33333333                      | 42,75       | 0,287                                                            | 0,07289 | 0,43962 | 0,20045 | 0,51962  | 0,04902 | 0,09804 | 0,33334 |
| d58        | 1         | 5,43                             | 2,00        | 0,49206                                                          | 0,1746  | 0,2381  | 0,09524 | 0,6993   | 0,0999  | 0,04995 | 0,14985 |
|            | 2         | 10,38                            | 7,75        | 0,36127                                                          | 0,15655 | 0,40944 | 0,07225 | 0,22581  | 0,06452 | 0,22581 | 0,48387 |
|            | 3         | 10,13                            | 6,00        | 0,33317                                                          | 0,20977 | 0,33317 | 0,1234  | 0,25     | 0,20833 | 0,375   | 0,16667 |
