# Supplementary material for: The alternative regenerative strategy of bearded dragon unveils the key processes underlying vertebrate tooth renewal
Source: eLife journal article supplement (doi:10.7554/elife.47702), 2019-08-16
Supplement: supp [file elife-47702-supp-v1.zip]

|                | <b>Replicate</b> | <b>Total cells (DAPI)</b> | <b>PCNA+ cells</b> | <b>Proportion of PCNA+/total cells</b> |
|----------------|------------------|---------------------------|--------------------|----------------------------------------|
| <b>Control</b> | <b>1</b>         | 119                       | 69                 | 0,579831933                            |
|                | <b>2</b>         | 90                        | 33                 | 0,366666667                            |
|                | <b>3</b>         | 106                       | 66                 | 0,622641509                            |
|                | <b>4</b>         | 134                       | 76                 | 0,567164179                            |
| <b>Removal</b> | <b>1</b>         | 82                        | 13                 | 0,158536585                            |
|                | <b>2</b>         | 112                       | 37                 | 0,330357143                            |
|                | <b>3</b>         | 81                        | 39                 | 0,481481481                            |
|                | <b>4</b>         | 204                       | 45                 | 0,220588235                            |
