# Supplementary material for: The alternative regenerative strategy of bearded dragon unveils the key processes underlying vertebrate tooth renewal
Source: eLife. 2019 Aug 16;8:e47702. doi: 10.7554/eLife.47702 (PMC6744223; doi:10.7554/eLife.47702)
Supplement: Supplementary file 1. — List of significantly upregulated (UP) and downregulated (DOWN) genes in acrodont vs pleurodont SDL and acrodont vs pleurodont mesenchyme, with gene names, fold change (FC), P-values, and False Discovery Rate (FDR)-corrected P-values. [file elife-47702-supp1.xls]

## Sheet: Acrodont vs Pleurodont_SDL
Expression	Gene names	logFC	logCPM	P-values	FDR	FC
UP	FAM196B	3.77954	4.31207	0.000202813	0.0193231	13.7327
UP	CFB	3.08564	5.14205	0.000374963	0.0329481	8.48928
UP	LOC110082831	3.96155	4.93583	5.04317e-05	0.00559001	15.5792
UP	TSPEAR	7.00051	3.50492	0.000196691	0.0189528	128.045
UP	FOS	4.23876	4.94492	4.77247e-05	0.00536677	18.8796
UP	SYN2	6.80226	3.3459	0.000454686	0.0387489	111.605
UP	LOC110090297	8.35312	4.66287	4.40584e-06	0.000685493	326.993
UP	PTGS2	5.31304	3.79381	0.000147129	0.0147642	39.7542
UP	LOC110089066	5.36111	4.45215	1.43545e-05	0.0019475	41.1011
UP	SLC38A3	5.5575	4.72526	1.09136e-05	0.00156851	47.0948
UP	SLC37A2	3.06638	5.50923	0.000481627	0.0406364	8.37671
UP	SLC6A14	7.55071	3.96301	5.15612e-05	0.00564146	187.495
UP	LOC110072807	4.51055	5.04175	1.81792e-05	0.00237155	22.7935
UP	LOC110083345	3.19798	4.30532	0.000448464	0.0386066	9.1767
UP	NGB	3.07514	5.40962	0.000462515	0.0392189	8.42773
UP	ALX1	7.00313	5.20865	1.93153e-06	0.000334254	128.278
UP	GALNT6	3.33394	5.19945	0.000200029	0.0191655	10.0836
UP	AQP3	4.24919	5.97332	3.37063e-05	0.00408304	19.0166
UP	RELN	4.89835	7.52068	4.77848e-05	0.00536677	29.8229
UP	SIX3	7.28493	3.73876	0.00020439	0.0193645	155.949
UP	LOC110074887	5.24454	4.45117	3.77511e-05	0.00447707	37.9108
UP	LOC110074853	8.12511	4.46078	1.18434e-05	0.00167377	279.191
UP	STEAP4	4.13976	5.57361	3.72776e-05	0.00445205	17.6275
UP	LOC110088485	4.03011	4.97524	4.43358e-05	0.00508034	16.3375
UP	LOC110088456	3.45902	4.24665	0.000606474	0.0499281	10.9969
UP	LOC110089730	7.4772	3.90033	7.95235e-05	0.008429	178.181
UP	PLCE1	3.12986	5.77781	0.00051231	0.0430112	8.75351
UP	ISL1	7.87059	4.23807	1.22774e-05	0.00170666	234.036
UP	PIM2	3.54264	5.03499	0.000129884	0.0133497	11.653
UP	LOC110075347	3.57214	4.6332	0.000182003	0.017739	11.8938
UP	RPH3A	4.17849	4.01204	0.000374503	0.0329481	18.1072
DOWN	TARSL2	-6.85796	11.0389	3.48598e-05	0.00419282	0.00862081
DOWN	KCND2	-9.55956	7.94371	1.14008e-08	4.20318e-06	0.00132521
DOWN	NPAS4	-8.4155	4.05679	1.86182e-06	0.000325512	0.00292875
DOWN	FBXO43	-5.94724	3.38826	2.349e-05	0.00295087	0.0162069
DOWN	BMX	-11.878	9.59377	4.09518e-09	2.11569e-06	0.000265692
DOWN	LGALS4	-9.36827	5.02819	9.33456e-09	3.51789e-06	0.00151311
DOWN	SV2B	-5.10275	5.14206	1.67655e-06	0.000305727	0.0291017
DOWN	LOC110080385	-14.0736	10.084	2.88011e-09	2.03516e-06	5.80001e-05
DOWN	LOC110070973	-4.24598	6.13971	3.99677e-05	0.00464255	0.0527026
DOWN	OBSL1	-9.75754	8.15382	1.32003e-08	4.66782e-06	0.00115528
DOWN	FAM46C	-8.3022	9.60403	1.13755e-06	0.000216761	0.00316803
DOWN	LOC110091055	-12.4421	8.38679	3.35947e-09	2.04057e-06	0.000179698
DOWN	LOC110091057	-14.2071	10.2204	2.62115e-09	2.03516e-06	5.28729e-05
DOWN	APPL2	-5.78749	10.8901	0.000236587	0.0220454	0.0181047
DOWN	LOC110080238	-11.403	7.26116	1.29367e-09	1.99449e-06	0.000369281
DOWN	ASRGL1	-6.45626	7.77149	2.03455e-06	0.000341623	0.0113887
DOWN	LOC110069919	-5.42291	6.00501	6.49946e-07	0.0001328	0.0233099
DOWN	ABAT	-6.78303	8.27884	2.59589e-06	0.000431605	0.0090804
DOWN	LOC110079136	-5.25373	10.0486	0.000442416	0.0382803	0.0262102
DOWN	LOC110070763	-3.53556	4.98007	0.000248736	0.0230509	0.0862362
DOWN	EVL	-4.76634	8.32004	0.000275584	0.0252629	0.0367442
DOWN	MTUS2	-4.37949	7.19486	0.00014036	0.0141688	0.0480444
DOWN	LOC110069840	-13.4851	9.47883	4.4584e-09	2.11569e-06	8.72142e-05
DOWN	IGFN1	-7.35248	9.21612	4.16519e-06	0.00065405	0.00611903
DOWN	ECT2L	-8.61002	9.54427	5.09159e-07	0.000105303	0.00255932
DOWN	CIZ1	-5.36945	8.07899	4.46778e-05	0.00508517	0.02419
DOWN	LOC110080922	-9.73611	10.3179	1.73644e-07	4.26788e-05	0.00117257
DOWN	HHIPL1	-4.04689	6.95995	0.000253243	0.023341	0.0605013
DOWN	SYT7	-7.5453	8.2457	4.6338e-07	9.94742e-05	0.0053535
DOWN	FTCD	-13.0047	8.97944	4.956e-09	2.11569e-06	0.000121672
DOWN	HAL	-13.1741	9.15602	5.46588e-09	2.17309e-06	0.000108196
DOWN	LOC110091494	-6.48352	7.81097	2.02335e-06	0.000341623	0.0111755
DOWN	RHBDD1	-4.7143	8.5783	0.000431292	0.0375091	0.0380938
DOWN	LOC110089072	-4.17365	4.98522	2.94238e-05	0.00358992	0.0554125
DOWN	LOC110089002	-10.8649	9.95501	3.02406e-08	9.32457e-06	0.000536227
DOWN	LOC110078423	-10.1285	8.75457	1.86783e-08	6.09165e-06	0.000893328
DOWN	PRG4	-10.4006	8.05176	2.57335e-09	2.03516e-06	0.000739776
DOWN	LOC110080706	-12.9175	8.88823	4.69875e-09	2.11569e-06	0.000129251
DOWN	RAD9A	-3.91937	6.92405	0.000337925	0.030322	0.0660923
DOWN	SYCP1	-11.697	7.58426	1.70488e-09	2.03516e-06	0.000301194
DOWN	CUNH16orf86	-12.0547	9.77509	3.58893e-09	2.04057e-06	0.000235065
DOWN	LOC110070264	-7.37618	2.9683	0.000162283	0.0160945	0.00601933
DOWN	LOC110083541	-10.6313	6.40029	6.78058e-10	1.99449e-06	0.000630442
DOWN	LOC110070229	-13.3845	9.37473	4.81677e-09	2.11569e-06	9.35124e-05
DOWN	LOC110072838	-12.1081	8.0298	2.52429e-09	2.03516e-06	0.000226511
DOWN	AGXT	-13.4312	9.42304	4.6476e-09	2.11569e-06	9.05349e-05
DOWN	KIN	-7.88672	10.3809	3.74838e-06	0.000594101	0.00422533
DOWN	LOC110082111	-5.19317	7.53502	2.93662e-05	0.00358992	0.0273338
DOWN	LOC110084711	-8.66844	6.21443	6.18217e-10	1.99449e-06	0.00245777
DOWN	DNAJC6	-10.1806	11.114	1.0314e-07	2.68975e-05	0.000861674
DOWN	COG4	-4.56838	8.1349	0.000355875	0.0317646	0.0421484
DOWN	ZDHHC23	-7.62482	10.1105	5.0468e-06	0.00077808	0.0050664
DOWN	LIPI	-7.56447	10.735	8.48258e-06	0.00125092	0.00528284
DOWN	CFAP99	-5.94637	3.45309	1.57385e-05	0.00211832	0.0162168
DOWN	LOC110085930	-13.8026	9.80617	3.50786e-09	2.04057e-06	6.99826e-05
DOWN	SLC25A19	-4.42916	8.04734	0.000415502	0.0363222	0.0464183
DOWN	NELL2	-6.7991	7.15059	2.27802e-07	5.15106e-05	0.00897981
DOWN	SFRP4	-4.64992	3.37045	5.95924e-05	0.00643712	0.0398321
DOWN	DOC2A	-4.8039	3.553	0.000134948	0.0137041	0.0357999
DOWN	DNAH11	-5.17807	5.34124	1.70238e-06	0.000307135	0.0276214
DOWN	DNAH14	-9.53091	7.11052	1.13203e-09	1.99449e-06	0.00135179
DOWN	LOC110071221	-8.4155	4.05679	1.86182e-06	0.000325512	0.00292875
DOWN	LOC110071208	-7.93343	3.53839	1.73425e-05	0.00227994	0.00409072
DOWN	OTOG	-9.59304	9.75948	1.2227e-07	3.09488e-05	0.00129481
DOWN	RNF222	-6.17558	3.70639	3.09648e-06	0.000500125	0.0138346
DOWN	LOC110070688	-11.7993	7.69576	1.87425e-09	2.03516e-06	0.000280585
DOWN	LOC110070715	-8.93687	8.99781	2.00589e-07	4.65999e-05	0.0020405
DOWN	LOC110071875	-6.82305	5.68992	2.81938e-08	8.85442e-06	0.00883196
DOWN	LOC110070525	-5.10485	8.34187	0.000132541	0.0135407	0.0290595
DOWN	LOC110071837	-4.18047	7.10192	0.000207557	0.0194473	0.0551512
DOWN	TRPA1	-9.26652	8.28757	4.03506e-08	1.17984e-05	0.00162368
DOWN	FAM161A	-8.61083	10.2993	8.81665e-07	0.000178002	0.00255789
DOWN	LOC110081127	-12.0474	7.96441	2.38033e-09	2.03516e-06	0.000236251
DOWN	LOC110082456	-8.95505	6.53086	7.41392e-10	1.99449e-06	0.00201494
DOWN	TMEM40	-5.65267	5.2458	1.04678e-07	2.68975e-05	0.0198782
DOWN	LOC110070468	-9.51196	5.17563	4.62213e-09	2.11569e-06	0.00136967
DOWN	NTN4	-8.5127	9.81194	9.18487e-07	0.000183254	0.00273792
DOWN	SPATA13	-5.25636	6.9415	6.76388e-06	0.00101512	0.0261624
DOWN	LOC110070391	-7.67042	10.433	6.03649e-06	0.000922278	0.00490876
DOWN	MORN3	-8.49504	7.9926	7.82011e-08	2.1051e-05	0.00277165
DOWN	LRRIQ3	-8.52757	6.91517	5.50994e-09	2.17309e-06	0.00270985
DOWN	HCN1	-12.1853	8.11262	2.7096e-09	2.03516e-06	0.000214718
DOWN	RAPGEF4	-7.02632	9.45716	9.4787e-06	0.00138577	0.00767126
DOWN	MSLN	-4.64047	3.39476	0.000303137	0.0273452	0.040094
DOWN	LOC110072060	-12.4104	8.3531	3.27643e-09	2.04057e-06	0.000183689
DOWN	RARB	-5.33724	4.15034	6.72871e-06	0.00101512	0.024736
DOWN	MAP2K5	-5.69162	9.97381	0.000185171	0.0179446	0.0193487
DOWN	ABLIM2	-8.6666	10.7681	1.28639e-06	0.000239735	0.0024609
DOWN	LOC110085222	-14.5661	10.5861	2.04866e-09	2.03516e-06	4.12255e-05
DOWN	POC1A	-8.78568	8.96157	1.99417e-07	4.65999e-05	0.00226593
DOWN	THY1	-5.0185	7.38401	3.92034e-05	0.00458518	0.0308518
DOWN	CDR2L	-5.86775	9.63455	0.000107687	0.0113433	0.017125
DOWN	DNHD1	-6.51122	10.0676	4.13722e-05	0.004773	0.010963
DOWN	MMRN2	-8.48224	11.0101	1.9615e-06	0.000336011	0.00279635
DOWN	ASB5	-10.1604	10.032	5.58199e-08	1.56128e-05	0.000873783
DOWN	IFT88	-3.49221	6.43207	0.000595731	0.049283	0.088867
DOWN	ANKRD42	-13.1165	9.09613	5.2908e-09	2.17309e-06	0.000112597
DOWN	ASPA	-8.35366	7.99367	7.81732e-08	2.1051e-05	0.00305701
DOWN	LOC110086358	-4.37542	8.10366	0.000518108	0.0432837	0.0481801
DOWN	TMEM145	-8.40436	5.87115	6.90775e-10	1.99449e-06	0.00295145
DOWN	FAN1	-3.61069	5.27387	0.000118362	0.0123907	0.0818606
DOWN	LIN7A	-6.32092	7.78425	2.76402e-06	0.000450721	0.0125087
DOWN	MGAT1	-5.75376	10.1461	0.000180604	0.0177044	0.0185329
DOWN	UBE2B	-5.83647	9.7606	0.000122476	0.0127075	0.0175004
DOWN	RERG	-4.89372	6.36933	7.87355e-06	0.00117129	0.0336391
DOWN	PLEKHO2	-6.59512	8.08235	2.65004e-06	0.000436331	0.0103436
DOWN	ANGPT2	-5.17834	6.21203	1.64997e-06	0.000304151	0.0276162
DOWN	TLL1	-8.59236	8.75877	1.91328e-07	4.63532e-05	0.00259085
DOWN	LOC110071086	-7.93343	3.53839	1.73425e-05	0.00227994	0.00409072
DOWN	LOC110083051	-14.1319	10.1436	2.76306e-09	2.03516e-06	5.57024e-05
DOWN	LOC110072380	-11.4795	10.9165	1.32116e-08	4.66782e-06	0.000350212
DOWN	LOC110085511	-11.3359	7.18695	1.20985e-09	1.99449e-06	0.000386862
DOWN	LOC110074824	-8.84021	4.49902	1.98008e-07	4.65999e-05	0.00218188
DOWN	GPA33	-7.04685	8.06194	1.01471e-06	0.000199224	0.00756289
DOWN	TCP11	-12.5332	8.4834	3.60971e-09	2.04057e-06	0.000168709
DOWN	LOC110085553	-9.62224	8.21203	1.37198e-08	4.74844e-06	0.00126887
DOWN	LOC110086739	-6.25941	9.64009	4.88886e-05	0.00545461	0.0130536
DOWN	LOC110086732	-12.8834	8.85249	4.5979e-09	2.11569e-06	0.000132344
DOWN	NXNL1	-7.59423	5.05554	7.84218e-09	3.02263e-06	0.00517499
DOWN	STK32A	-7.94484	5.44843	1.64068e-09	2.03516e-06	0.0040585
DOWN	CUNH14orf39	-8.4155	4.05679	1.86182e-06	0.000325512	0.00292875
DOWN	ARHGAP28	-5.42825	5.77768	4.57513e-07	9.94738e-05	0.0232238
DOWN	TEX11	-6.64127	4.11141	1.03377e-06	0.000199224	0.010018
DOWN	GRIK1	-8.65505	4.31341	4.78171e-07	0.000101366	0.00248067
DOWN	LOC110089767	-7.53909	9.52374	3.53256e-06	0.000565176	0.00537662
DOWN	LOC110088436	-10.9401	6.74617	8.30003e-10	1.99449e-06	0.000508997
DOWN	TOX4	-5.16426	7.42529	2.64769e-05	0.00327753	0.027887
DOWN	TTC29	-5.53348	3.8792	1.31219e-05	0.00179463	0.0215901
DOWN	TTC13	-6.17323	9.44245	5.10588e-05	0.00562277	0.0138571
DOWN	ARPP21	-8.45875	7.87746	3.23472e-08	9.796e-06	0.00284224
DOWN	SLC17A6	-11.8946	7.7993	2.06452e-09	2.03516e-06	0.00026264
DOWN	LOC110088341	-13.8445	9.84914	3.4014e-09	2.04057e-06	6.79825e-05
DOWN	LOC110089661	-7.18277	10.0676	1.10863e-05	0.00157993	0.00688289
DOWN	ERICH2	-6.45258	8.96618	1.87988e-05	0.00243365	0.0114178
DOWN	SNCB	-8.75507	8.056	3.5646e-08	1.06056e-05	0.00231453
DOWN	ACAT2	-4.82944	7.5657	7.40564e-05	0.00789888	0.0351718
DOWN	CCDC129	-6.61663	6.92472	2.17394e-07	4.98215e-05	0.0101905
DOWN	HEATR9	-12.7125	8.67288	4.10278e-09	2.11569e-06	0.000148987
DOWN	LOC110089508	-8.35994	7.59027	2.7311e-08	8.739e-06	0.00304373
DOWN	LOC110078856	-11.3011	7.14838	1.16723e-09	1.99449e-06	0.000396313
DOWN	LOC110077506	-6.59475	4.95282	4.71557e-08	1.35545e-05	0.0103462
DOWN	HORMAD2	-10.4437	6.19171	6.16612e-10	1.99449e-06	0.000718017
DOWN	SLC15A1	-9.07259	9.41794	2.67604e-07	5.97144e-05	0.00185728
DOWN	MARCH1	-6.28112	7.33533	1.0276e-06	0.000199224	0.0128586
DOWN	LCA5L	-7.18258	6.41629	1.70558e-08	5.78498e-06	0.00688379
DOWN	LOC110088018	-4.7891	4.03418	1.62969e-05	0.00217621	0.0361692
DOWN	LOC110078786	-13.0152	8.99045	4.99012e-09	2.11569e-06	0.000120787
DOWN	ACBD4	-7.11872	10.7467	2.01584e-05	0.0025899	0.00719534
DOWN	SPI1	-4.23394	5.17884	2.42001e-05	0.00301772	0.0531443
DOWN	MTERF3	-5.28437	7.85946	3.88533e-05	0.00457578	0.0256593
DOWN	JOSD2	-5.92143	9.12621	6.91855e-05	0.00742606	0.0164996
DOWN	ITGB2	-5.94057	10.8009	0.000176126	0.0173658	0.0162821
DOWN	LOC110074293	-4.74044	8.03142	0.000206999	0.0194473	0.0374099
DOWN	MIS18BP1	-3.46359	5.60526	0.000297813	0.0270086	0.0906477
DOWN	LOC110075580	-8.69167	9.1437	3.3354e-07	7.34612e-05	0.00241851
DOWN	LOC110086231	-3.30162	5.64048	0.000588581	0.0489301	0.101417
DOWN	RHPN1	-5.28921	9.3769	0.000288151	0.0262728	0.0255735
DOWN	LOC110088843	-4.08027	6.10658	5.69814e-05	0.00619454	0.0591174
DOWN	TTI2	-8.85779	9.91053	4.8637e-07	0.000101832	0.00215545
DOWN	PHYHIPL	-7.61997	7.74228	1.40413e-07	3.50186e-05	0.00508346
DOWN	LOC110086074	-14.1222	10.1337	2.78286e-09	2.03516e-06	5.60776e-05
DOWN	LOC110087436	-7.13674	9.86292	1.04947e-05	0.00152119	0.00710605
DOWN	LOC110087417	-7.30375	7.15665	5.6158e-08	1.56128e-05	0.00632923
DOWN	SLCO1C1	-9.76612	9.60054	8.08285e-08	2.14183e-05	0.00114843
DOWN	LOC110074074	-4.38673	7.887	0.000367087	0.0325939	0.0478037
DOWN	LOC110086035	-5.72849	9.71538	0.000149635	0.0149274	0.0188605
DOWN	CD96	-5.715	6.75749	1.15754e-06	0.00021812	0.0190376
DOWN	LOC110089936	-4.53124	6.32636	2.31627e-05	0.00293146	0.0432475
DOWN	SLC19A2	-7.17168	10.2541	1.26073e-05	0.00173826	0.00693598
DOWN	FMOD	-7.39374	3.52984	2.07883e-05	0.00265074	0.00594651
DOWN	INPP5D	-3.14025	4.67729	0.00045358	0.0387489	0.11342
DOWN	STAC	-10.9851	6.7967	8.57871e-10	1.99449e-06	0.000493334
DOWN	LOC110087219	-4.98462	4.22252	1.22238e-05	0.00170666	0.031585
DOWN	LOC110076538	-7.34522	6.68979	1.82672e-08	6.07438e-06	0.00614992
DOWN	LOC110077807	-4.42023	7.19213	0.000122886	0.0127075	0.0467064
	HTR4	1.12582	5.18919	0.0975663	1	2.18225
	HTR6	2.57027	1.28052	1	1	5.9392
	HTR7	0.265874	1.83874	1	1	1.20236
	LURAP1L	-0.767197	3.39549	0.678738	1	0.587558
	FAM19A2	1.14787	4.03101	0.101074	1	2.21587
	BBX	0.62484	6.92634	0.452644	1	1.54204
	FAM19A1	-2.86562	1.27369	1	1	0.137203
	FAM19A5	-0.32671	3.31991	1	1	0.797353
	CUNH12orf4	0.252019	4.43935	0.541102	1	1.19087
	FAM19A3	0.687018	1.6944	0.682753	1	1.60995
	WDR83OS	-0.0610246	4.01326	0.837263	1	0.958583
	BCR	0.791068	5.73101	0.23868	1	1.73036
	ORAI3	0.585981	3.12308	0.376361	1	1.50106
	ORAI2	2.13393	1.7607	0.470699	1	4.38912
	AGTR1	-0.575247	3.81284	0.748192	1	0.671171
	VOPP1	0.134836	5.46808	0.699927	1	1.09797
	AGTR2	-0.0828519	2.78407	1	1	0.944189
	COL13A1	0.452457	3.08121	0.531976	1	1.36837
	SHMT2	0.671564	3.98671	0.280051	1	1.5928
	SHMT1	-0.763466	2.82479	0.646505	1	0.589079
	B3GLCT	0.0722933	5.68849	0.776756	1	1.05139
	RDH10	0.413917	5.22224	0.432218	1	1.3323
	NEBL	0.408239	6.67916	0.582782	1	1.32706
	DHFR	0.214902	4.92559	0.570741	1	1.16063
	PKIB	-0.0706971	3.25054	1	1	0.952178
	PKIA	-1.19211	3.33793	0.333905	1	0.437661
	STRN	0.539657	7.29826	0.54066	1	1.45363
	PKIG	-2.10293	2.18828	0.323041	1	0.232784
	KCNC4	-0.138772	2.69202	1	1	0.908292
	GLT1D1	0.278035	1.98974	1	1	1.21254
	NEFL	-0.147802	1.25819	1	1	0.902625
	NEFM	-2.71078	1.23576	1	1	0.152747
	MYBPC3	1.78995	1.1671	1	1	3.45803
	MYBPC1	-0.195366	1.9662	1	1	0.873351
	KCND1	-2.86562	1.27369	1	1	0.137203
	GSTO1	0.591589	6.49231	0.433765	1	1.50691
	BGN	0.072403	5.41371	0.738917	1	1.05147
	TMEFF1	0.187973	4.26474	0.560199	1	1.13916
	TMEFF2	1.54007	2.5691	0.190483	1	2.90808
	LOC110078188	-4.12183	1.5656	0.315816	1	0.057439
	PKN3	-1.11193	2.40128	0.547719	1	0.462675
	SYNPO2	-1.08807	3.48388	0.380906	1	0.470389
	GSTP1	0.331893	4.66903	0.45912	1	1.25866
	PTAFR	0.732626	2.61282	0.48919	1	1.66166
	ADAM22	0.2702	2.89239	0.76854	1	1.20597
	KIAA2022	2.10065	4.03193	0.0119238	0.571231	4.28903
	KCNA4	-2.2182	1.93561	0.233592	1	0.21491
	SDAD1	0.0400427	5.94876	0.831804	1	1.02814
	ADAM28	0.689155	4.93258	0.249483	1	1.61234
	ADAM23	0.828908	4.05385	0.196567	1	1.77634
	STX6	0.396746	5.45998	0.461875	1	1.31653
	STX5	-0.0607895	4.07622	0.842191	1	0.958739
	STX4	0.150757	5.84674	0.715774	1	1.11015
	LOC110078182	-0.0117291	6.55872	0.921017	1	0.991903
	STX3	0.17459	4.81376	0.614315	1	1.12864
	STX2	0.58241	3.71322	0.343782	1	1.49735
	BID	-0.165441	3.90676	1	1	0.891656
	SPDEF	4.22305	1.74562	0.122284	1	18.6752
	MBD3	0.206811	4.99136	0.592982	1	1.15413
	MBD4	0.441526	4.05182	0.414125	1	1.35804
	LOC110078179	-0.960135	6.91136	0.355459	1	0.514009
	MBD5	0.348256	6.03258	0.569118	1	1.27302
	MBD6	1.71499	4.19917	0.0219935	0.855477	3.28295
	PKLR	-0.105185	5.83613	0.946781	1	0.929686
	KCNB1	1.73756	1.15254	1	1	3.33471
	MBD1	0.308785	5.13211	0.509936	1	1.23866
	KCNB2	0.255423	6.553	0.689524	1	1.19369
	LOC110080499	1.78995	1.1671	1	1	3.45803
	KIAA2012	3.03681	1.37259	0.544307	1	8.20675
	KIAA2013	-0.619397	3.02673	0.894665	1	0.650943
	PKN2	0.658689	6.71285	0.411324	1	1.57865
	MITD1	-0.665422	4.42112	0.601974	1	0.630504
	PKN1	0.2951	5.3454	0.52814	1	1.22697
	LOC110078176	0.554414	6.24469	0.430512	1	1.46857
	LOC110080487	0.711555	3.207	0.279819	1	1.63757
	LOC110078166	1.52864	1.96333	0.328056	1	2.88513
	KCNG1	0.994132	1.46554	1	1	1.99188
	KCNG2	-3.24503	2.461	0.035956	1	0.105475
	KCNG3	1.19884	1.99225	0.564612	1	2.29556
	LOC110078168	0.390869	2.46332	0.705645	1	1.31118
	KCNG4	-3.83576	1.56733	0.0563607	1	0.0700361
	RASL11B	0.165791	4.42716	0.602008	1	1.12178
	FBXO28	0.433605	5.27644	0.422185	1	1.3506
	GOLIM4	-0.737951	7.23134	0.454594	1	0.59959
	FBXO25	-0.0880579	4.53156	0.886346	1	0.940788
	FBXO24	3.03681	1.37259	0.544307	1	8.20675
	FBXO21	0.632687	5.94338	0.343992	1	1.55045
	FBXO22	0.273011	5.17725	0.563575	1	1.20833
	FADS2	-0.360421	2.9993	1	1	0.778937
	POFUT2	0.154681	5.68262	0.703401	1	1.11318
	PTAR1	0.0539731	5.27825	0.750478	1	1.03812
	FNTA	0.589182	6.06541	0.386713	1	1.50439
	FADS6	0.186064	2.80307	0.647251	1	1.13766
	POFUT1	0.302483	6.56842	0.653834	1	1.23327
	NEK1	0.704791	6.56974	0.372582	1	1.62991
	TNFRSF8	0.171683	1.55814	1	1	1.12637
	NEK2	0.65056	3.87577	0.317104	1	1.56978
	NEK3	0.541977	4.34579	0.316803	1	1.45597
	LOC110079491	1.78995	1.1671	1	1	3.45803
	TNFRSF4	1.73756	1.15254	1	1	3.33471
	LOC110078163	-1.07781	1.56371	1	1	0.473746
	FADS1	0.406611	3.72235	0.44057	1	1.32557
	PIAS4	0.785421	3.81367	0.228038	1	1.7236
	KCNH2	1.73756	1.15254	1	1	3.33471
	PIAS3	-0.321531	4.5393	0.962015	1	0.80022
	LOC110079489	0.58557	1.65735	0.682946	1	1.50063
	LOC110080474	-2.03161	1.16353	1	1	0.244582
	LOC110079488	0.598298	4.51406	0.280532	1	1.51393
	DGAT2	-1.52056	1.91425	0.328481	1	0.348551
	FBXO18	0.628564	3.62938	0.324115	1	1.54603
	DGAT1	-0.195862	3.95728	1	1	0.873051
	KCNH7	4.5336	1.89163	0.0799624	1	23.1606
	LOC110080479	3.5534	1.52397	0.31646	1	11.7403
	FBXO16	0.363572	3.44019	0.476493	1	1.28661
	STX8	0.214964	5.39328	0.628087	1	1.16067
	STX7	0.240567	6.12044	0.748907	1	1.18146
	FBXO15	0.449311	1.35597	1	1	1.36539
	FBXO10	1.07869	4.50139	0.0931726	1	2.11211
	FBXO11	0.23707	7.49047	0.77531	1	1.1786
	PIAS2	-0.0980758	5.55094	0.967597	1	0.934278
	PIAS1	0.615277	5.71044	0.333228	1	1.53185
	LENG1	0.46223	3.88638	0.399216	1	1.37767
	MINPP1	0.084552	6.41973	0.823485	1	1.06036
	DMTF1	0.23177	5.28508	0.595193	1	1.17427
	PKP2	-0.485233	7.64461	0.63665	1	0.714382
	PKP1	0.514697	10.4288	0.683393	1	1.42869
	PKP4	0.287092	8.71546	0.791375	1	1.22018
	PKP3	0.106758	9.07705	0.920917	1	1.07681
	LOC110078150	2.60182	1.29122	1	1	6.07052
	LOC110079483	-1.93775	1.14366	1	1	0.261023
	LOC110078152	-0.973219	1.32975	1	1	0.509368
	LOC110078145	-1.93775	1.14366	1	1	0.261023
	LOC110080463	0.763589	2.54801	0.441744	1	1.69771
	LOC110079478	-2.78782	1.25476	1	1	0.144805
	KCNE2	-2.03161	1.16353	1	1	0.244582
	KCNE3	-0.6538	2.15779	1	1	0.635604
	LOC110079479	0.317402	4.02871	0.535459	1	1.24608
	ZC4H2	1.1205	3.34297	0.178481	1	2.17422
	KCNE5	-4.09299	1.56128	0.193305	1	0.0585985
	IREB2	0.254527	5.33509	0.57638	1	1.19294
	FBXO48	2.63368	1.30192	0.544307	1	6.20605
	FBXO45	1.01347	3.44205	0.17641	1	2.01876
	FBXO46	0.198784	3.88068	0.594143	1	1.14773
	LOC110081792	-2.30556	1.62088	0.315431	1	0.202283
	NPAS2	2.34639	4.62869	0.00417872	0.265419	5.08551
	FBXO42	0.430675	4.84704	0.405051	1	1.34786
	NPAS3	0.0947148	4.52016	0.699162	1	1.06785
	FBXO40	-0.340238	1.46519	1	1	0.789911
	MBIP	0.539329	4.45788	0.335283	1	1.4533
	BMF	-0.525797	6.33645	0.646835	1	0.694575
	LOC110078143	-1.93775	1.14366	1	1	0.261023
	LOC110081785	1.07006	3.94745	0.136877	1	2.09952
	NEK8	-0.831039	2.37378	0.842917	1	0.562124
	NEK9	0.349089	6.68762	0.671586	1	1.27376
	KCNF1	-0.608632	2.32331	1	1	0.655818
	SDF2L1	1.16683	4.12441	0.0935198	1	2.24518
	LOC110081782	0.23333	4.8342	0.568491	1	1.17555
	HTR1E	0.481135	2.86547	0.555045	1	1.39584
	NEK4	-0.0867099	5.55526	0.915907	1	0.941668
	LOC110080458	-0.920831	1.34316	1	1	0.528205
	NEK5	0.342092	3.54373	0.570144	1	1.26759
	LOC110078138	-0.132486	5.70284	0.985118	1	0.912258
	FBXO38	0.558083	5.52538	0.357949	1	1.47231
	NEK6	0.306879	6.00031	0.58959	1	1.23703
	TNFRSF9	-1.93775	1.14366	1	1	0.261023
	STYX	0.250614	4.5419	0.53348	1	1.18971
	NEK7	0.390357	6.56724	0.582261	1	1.31072
	FBXO36	0.994119	2.50502	0.443362	1	1.99186
	HTR1B	-0.915734	1.54281	1	1	0.530074
	FBXO34	-0.0727108	4.57294	0.854071	1	0.95085
	LOC110080450	0.958352	4.48602	0.144043	1	1.94309
	FBXO32	-0.61686	6.27483	0.578841	1	0.652089
	FBXO33	0.641268	5.31417	0.295728	1	1.5597
	FBXO30	0.163563	6.26739	0.812147	1	1.12005
	FBXO31	0.0885102	4.19868	0.670614	1	1.06327
	DRAP1	0.161744	4.46594	0.611308	1	1.11864
	LOC110081779	0.555636	3.83725	0.348126	1	1.46982
	MNAT1	0.589515	4.55303	0.292428	1	1.50474
	KCNK5	0.359266	4.93588	0.459456	1	1.28277
	LOC110081774	-1.40661	1.97121	0.564772	1	0.377198
	BCAR3	0.106122	4.16722	0.661105	1	1.07633
	PIWIL2	0.248178	1.50017	1	1	1.18771
	PIWIL1	-1.81114	2.01761	0.232873	1	0.284966
	PIWIL4	1.10298	3.15997	0.213625	1	2.14798
	ALAS2	3.49282	1.50136	0.31646	1	11.2575
	LOC110078124	0.5243	3.57488	0.401791	1	1.43824
	ALAS1	0.0104817	5.72222	0.83928	1	1.00729
	ONECUT2	2.95895	1.3459	0.544307	1	7.77557
	LOC110081778	-2.03161	1.16353	1	1	0.244582
	LOC110078126	1.78995	1.1671	1	1	3.45803
	LOC110079457	1.16151	3.15436	0.213838	1	2.23692
	LOC110080446	-0.264446	2.00033	1	1	0.832518
	LOC110078128	0.295273	1.59916	1	1	1.22712
	LOC110079459	0.912529	1.6631	0.682915	1	1.88234
	LOC110081775	0.0790508	4.12118	0.747361	1	1.05632
	LOC110078129	-1.93775	1.14366	1	1	0.261023
	HTR2B	1.82555	1.17822	1	1	3.54441
	PPWD1	-0.191805	5.01162	0.973754	1	0.87551
	HTR2C	1.06162	1.48826	1	1	2.08727
	NENF	-0.581611	3.76265	0.806463	1	0.668217
	HTR2A	-1.12806	1.36602	1	1	0.457531
	TNFSF13B	1.56192	1.60113	0.683248	1	2.95245
	BOC	0.334718	8.21298	0.745651	1	1.26113
	SPDL1	0.113978	4.65622	0.967593	1	1.08221
	NEO1	0.882484	9.42194	0.466055	1	1.84355
	BCAS2	0.217892	5.14136	0.591055	1	1.16303
	BCAS1	1.16979	2.74516	0.232714	1	2.24979
	BOK	0.231415	3.84992	0.594521	1	1.17399
	LOC110081763	-1.15857	2.30287	0.495213	1	0.447957
	BCAS3	0.955687	4.87451	0.142653	1	1.9395
	LOC110080430	0.324021	6.4008	0.619602	1	1.25181
	PIANP	-0.569033	1.9276	0.501232	1	0.674069
	LOC110081767	-1.26125	4.29988	0.204268	1	0.417182
	LOC110081766	0.0124118	4.01407	0.780475	1	1.00864
	VPS13C	0.528551	7.35266	0.55285	1	1.44248
	LOC110081765	0.14702	3.14559	0.707386	1	1.10728
	LOC110078117	-0.118863	2.54832	1	1	0.920913
	VPS13D	0.722122	6.08015	0.311962	1	1.64961
	DHPS	0.204007	5.05284	0.607675	1	1.15189
	VPS13A	0.62045	8.09546	0.546497	1	1.53735
	VPS13B	0.598932	7.68512	0.533388	1	1.51459
	RABGGTB	0.509022	6.01257	0.441341	1	1.42308
	RABGGTA	0.966174	3.92282	0.151493	1	1.95365
	NEMF	-0.0729847	4.68815	0.86443	1	0.950669
	C1D	1.35367	5.2217	0.0569933	1	2.55562
	LOC110081757	0.485593	1.94359	0.751421	1	1.40016
	BCAT1	0.564715	2.58944	0.586823	1	1.4791
	BCAT2	0.406163	4.48935	0.425025	1	1.32516
	LOC110078101	0.108057	3.39816	0.678683	1	1.07778
	C1S	2.13044	5.53625	0.00692374	0.391399	4.37852
	LOC110081756	2.57027	1.28052	1	1	5.9392
	C1R	0.667654	3.35194	0.333425	1	1.58849
	LENG9	-0.0287453	3.12851	0.9008	1	0.980272
	LENG8	1.07186	6.72758	0.207937	1	2.10214
	U2AF1	0.15015	6.41293	0.767611	1	1.10968
	IL2RG	-0.241659	1.27711	1	1	0.845772
	CUNHXorf57	0.378777	5.40034	0.483587	1	1.30024
	CUNHXorf56	-0.663167	4.33932	0.660223	1	0.63149
	CUNHXorf58	-0.262434	1.4479	1	1	0.83368
	U2AF2	0.278087	7.00929	0.736615	1	1.21259
	LOC110080418	-0.733259	2.05466	1	1	0.601543
	DRAM2	0.371822	4.36871	0.45137	1	1.29399
	SLC36A4	2.01802	2.17802	0.247849	1	4.05028
	TSPOAP1	1.78995	1.1671	1	1	3.45803
	LOC110079430	0.150398	5.70294	0.694422	1	1.10988
	KCNJ2	-0.523637	3.34218	0.827802	1	0.695616
	KCNJ3	-1.07567	1.37934	1	1	0.474451
	COL26A1	4.37916	1.81818	0.121841	1	20.8093
	LOC110079422	-0.154396	7.95762	0.91269	1	0.898508
	KCNJ8	-0.441198	2.37923	1	1	0.736523
	GPKOW	-0.246501	4.24353	1	1	0.842938
	LOC110080413	4.34178	1.80756	0.0803946	1	20.2772
	LOC110079424	-3.39732	1.37605	0.544307	1	0.0949083
	KCNJ9	3.16128	1.4168	0.544307	1	8.94622
	LOC110081743	-0.487441	3.92286	0.826176	1	0.713289
	GSTZ1	0.0326085	4.85757	0.738271	1	1.02286
	IL2RB	3.78683	1.59303	0.193066	1	13.8022
	LOC110080407	1.78995	1.1671	1	1	3.45803
	LOC110080406	1.09906	3.50082	0.153164	1	2.14215
	KCNK1	-0.0336396	4.1355	0.799755	1	0.976953
	KCNK2	0.173158	2.9086	0.670525	1	1.12752
	BCAR1	-0.0889103	2.94581	0.887219	1	0.940233
	KCNK3	-0.920831	1.34316	1	1	0.528205
	CUNHXorf65	0.24871	1.6908	1	1	1.18814
	SLC23A2	0.567025	5.75931	0.376367	1	1.48147
	LOC110081850	-0.465772	3.60441	0.856861	1	0.724084
	LOC110078203	2.54748	1.97601	0.233233	1	5.84614
	CERK	0.690526	6.05062	0.32656	1	1.61387
	LOC110081855	-1.54164	1.45754	1	1	0.343494
	LOC110081854	0.420119	4.38252	0.388234	1	1.33804
	LOC110078205	-0.29037	4.28335	1	1	0.817692
	LOC110081852	0.555016	4.05764	0.338819	1	1.46918
	LGALSL	1.0007	5.04634	0.126663	1	2.00098
	CCP110	0.848775	5.48253	0.195317	1	1.80097
	PEX26	-0.91057	3.93417	0.468698	1	0.531975
	LGALS3	0.117205	8.09306	0.896103	1	1.08463
	LGALS1	0.513138	7.50091	0.57757	1	1.42715
	BSG	0.348026	7.61233	0.71198	1	1.27282
	LOC110081847	0.677995	2.29411	0.674295	1	1.59991
	LOC110080516	-0.546305	1.79397	1	1	0.684772
	LOC110081846	0.0400402	4.15819	0.754576	1	1.02814
	ATXN7L1	0.536435	5.68415	0.375502	1	1.45038
	LOC110081845	-0.503591	3.03349	1	1	0.705349
	BSN	0.143422	4.02829	0.630616	1	1.10452
	ATXN7L2	-0.884312	2.08052	0.794125	1	0.541746
	LGALS8	0.0154459	6.56646	0.900504	1	1.01076
	ATXN7L3	0.620286	6.19902	0.381443	1	1.53718
	CER1	-4.07574	1.54937	0.315932	1	0.0593034
	LIMCH1	-1.09256	4.05464	0.338862	1	0.468929
	LOC110081843	-1.00688	3.68034	0.38092	1	0.497621
	GOLPH3L	0.27562	4.71281	0.501601	1	1.21051
	BTC	-2.34982	1.98772	0.233131	1	0.196171
	CFDP1	0.38941	4.20491	0.426545	1	1.30986
	BTD	-0.243794	4.42509	1	1	0.844521
	CRISPLD1	0.820542	3.2116	0.279644	1	1.76607
	SOAT1	0.404969	5.02183	0.429441	1	1.32406
	CRISPLD2	-1.6836	5.09073	0.0655615	1	0.311304
	SUB1	0.585725	6.4781	0.434537	1	1.50079
	NINJ2	-0.642068	2.84315	0.878744	1	0.640794
	KCNQ1	-0.286078	2.57777	1	1	0.820129
	NINJ1	0.424111	4.82801	0.42213	1	1.34175
	KCNQ3	1.78995	1.1671	1	1	3.45803
	BTK	-0.325861	1.74923	1	1	0.797822
	LOC110080505	-0.82677	1.56735	1	1	0.56379
	LOC110081836	-0.294047	1.2632	1	1	0.815611
	KCNQ5	0.819152	5.9004	0.242312	1	1.76437
	LOC110081839	2.9978	1.35926	0.544307	1	7.98778
	LOC110080507	-0.231944	1.49784	1	1	0.851487
	GRB7	0.391962	3.32007	0.511903	1	1.31218
	CETP	-0.265762	2.09753	1	1	0.831759
	LOC110080502	0.266743	3.07409	0.60596	1	1.20309
	DHX8	-0.112612	6.12767	0.989586	1	0.924912
	DHX9	0.217969	6.54764	0.797657	1	1.16309
	RRAD	-0.147802	1.25819	1	1	0.902625
	LOC110081831	0.43974	5.76623	0.461697	1	1.35636
	ZBTB1	0.436466	4.93199	0.416883	1	1.35329
	LOC110079518	1.73756	1.15254	1	1	3.33471
	ZBTB5	0.36991	4.98715	0.460276	1	1.29227
	ZBTB4	0.48965	6.02532	0.445923	1	1.4041
	ZBTB3	0.140352	2.68322	0.869611	1	1.10217
	CFAP126	1.82555	1.17822	1	1	3.54441
	ZBTB2	-0.19415	4.74687	0.967813	1	0.874088
	NKAIN2	-2.86731	2.28096	0.089499	1	0.137042
	NKAIN1	0.887404	3.66173	0.214705	1	1.84984
	NKAIN4	0.608936	4.60756	0.273328	1	1.52513
	MRNIP	-1.15358	2.61176	0.489224	1	0.449507
	RACGAP1	0.724505	4.3072	0.23333	1	1.65233
	RRAS	0.318711	6.64888	0.644648	1	1.24722
	NEU1	-0.046585	3.60886	0.856828	1	0.968225
	KCNN1	0.640153	2.97865	0.405453	1	1.55849
	FAM192A	-0.382212	4.94361	0.861398	1	0.76726
	KCNN2	-1.88346	1.53119	1	1	0.271033
	LOC110081824	-0.263798	1.4879	1	1	0.832892
	KCNN3	0.602067	1.40323	1	1	1.51789
	KCNN4	-2.0239	2.91044	0.100958	1	0.245893
	LOC110081828	2.35549	2.85341	0.0589533	1	5.11769
	BBS2	0.640208	4.57607	0.261075	1	1.55855
	SLC10A4	-3.20008	1.32164	0.544307	1	0.108813
	NTNG1	-0.214133	5.21035	1	1	0.862064
	BBS1	-0.133074	4.35514	0.912746	1	0.911886
	NTNG2	0.0939792	1.53355	1	1	1.06731
	XBP1	-0.543203	3.96198	0.773246	1	0.686245
	SLC10A7	-4.49049	8.71895	0.000816104	0.0637802	0.0444865
	YES1	0.309303	6.31803	0.625554	1	1.23911
	SLC10A1	1.41922	1.57342	0.683402	1	2.67441
	LOC110081820	-0.656215	3.91381	0.653995	1	0.634541
	SLC10A3	-1.0556	2.64532	0.487868	1	0.481096
	SUCO	0.466094	6.42149	0.677955	1	1.38136
	LOC110079509	0.800416	7.13028	0.368448	1	1.7416
	NET1	0.558537	9.50343	0.642587	1	1.47277
	ZBTB9	-0.609987	2.67188	0.8698	1	0.655203
	PEX5L	3.12288	2.75312	0.0300675	1	8.71122
	ZBTB6	-0.891881	3.05586	0.60657	1	0.538911
	SPDYA	-0.267026	2.65124	1	1	0.831031
	GRB2	0.418776	5.48864	0.457528	1	1.33679
	LOC110081816	-0.21284	3.4626	1	1	0.862837
	C8B	4.70355	1.97133	0.053959	1	26.0561
	TFB1M	0.556111	5.21061	0.337197	1	1.4703
	SUFU	0.274491	6.37134	0.663712	1	1.20957
	LOC110091105	-0.614482	2.38412	1	1	0.653164
	BBS7	0.614729	5.32024	0.312091	1	1.53127
	BBS5	-0.434176	3.55617	0.850471	1	0.740117
	LOC110081806	0.704545	4.33075	0.233506	1	1.62963
	BBS4	0.0491338	5.04745	0.748807	1	1.03464
	PCYT1B	-1.53545	2.64818	0.290918	1	0.344971
	ZHX2	-0.410968	4.7587	0.840145	1	0.752118
	PCYT1A	1.50259	4.10237	0.0481824	1	2.83351
	ZHX3	0.491049	5.57857	0.401428	1	1.40547
	FCER1G	0.325793	1.52495	1	1	1.25335
	LOC110081800	-0.989526	2.76435	0.523565	1	0.503643
	AGTRAP	2.36215	3.1747	0.0300672	1	5.14136
	CACYBP	0.367145	5.87745	0.638938	1	1.2898
	TFB2M	0.41921	5.0286	0.414355	1	1.3372
	LOC110091109	-0.68808	4.19748	0.583823	1	0.620679
	ZHX1	0.489787	5.28579	0.379975	1	1.40424
	RNF144A	0.37522	5.85244	0.51852	1	1.29704
	RNF144B	-3.89889	7.7562	0.00107662	0.0818764	0.0670373
	PITPNM1	0.741221	4.2161	0.2222	1	1.67159
	PITPNM3	0.166198	4.5232	0.628628	1	1.1221
	LOC110091117	1.73756	1.15254	1	1	3.33471
	PITPNM2	0.2658	5.15509	0.556725	1	1.2023
	TAX1BP1	0.387212	8.72536	0.728159	1	1.30786
	FAM193B	0.530484	4.29976	0.361432	1	1.44441
	FAM32A	0.244955	4.36165	0.550013	1	1.18506
	FAM193A	0.597294	6.96849	0.477168	1	1.51288
	SSNA1	0.315459	6.18655	0.600036	1	1.24441
	FAM35A	0.497152	5.12771	0.378481	1	1.41142
	NEXN	0.610121	7.1991	0.48816	1	1.52639
	LOC110091118	-2.71078	1.23576	1	1	0.152747
	FAM196A	-0.77814	4.02862	0.53546	1	0.583118
	PEX16	-0.410654	4.3569	0.871129	1	0.752283
	PEX19	0.246771	5.45231	0.596081	1	1.18655
	KLHL2	-0.0582741	4.49952	0.843341	1	0.960412
	KLHL3	0.821855	5.35021	0.200552	1	1.76768
	PEX10	0.0346292	2.71886	0.869044	1	1.02429
	KLHL4	-2.71533	2.49276	0.107818	1	0.152266
	KCNRG	-0.54511	2.03963	1	1	0.685339
	PEX12	-1.061	3.18297	0.46295	1	0.479301
	CFAP157	1.20837	1.84964	0.469992	1	2.31076
	PEX13	0.770264	5.72471	0.249255	1	1.70558
	PEX14	-0.180784	3.70158	0.932412	1	0.882223
	ETAA1	-0.513171	3.98782	0.831807	1	0.700681
	LOC110091135	1.78995	1.1671	1	1	3.45803
	TFAP4	-0.89411	2.88349	0.554363	1	0.538079
	KLHL5	-0.382013	4.35731	0.912749	1	0.767366
	KLHL6	4.37406	1.81597	0.121854	1	20.7359
	KCNS3	-0.757327	2.55102	0.344274	1	0.591592
	KLHL7	0.171879	5.71227	0.682408	1	1.12652
	KLHL8	0.565667	5.58928	0.360769	1	1.48007
	INPPL1	0.131463	5.15619	0.68171	1	1.0954
	PLAT	-1.08899	2.7331	0.525049	1	0.470092
	PLB1	-0.241659	1.27711	1	1	0.845772
	TXN2	0.111295	4.91462	0.671148	1	1.0802
	IGF1R	0.380673	8.29855	0.712763	1	1.30195
	FAM198A	-0.306503	4.16588	1	1	0.808599
	LOC110091143	0.600424	2.41882	0.547	1	1.51616
	LOC110091146	-0.147802	1.25819	1	1	0.902625
	LOC110091145	-0.0495705	3.44372	0.919644	1	0.966224
	PPIP5K1	0.074143	3.58994	0.78189	1	1.05274
	PPIP5K2	0.484228	6.60186	0.51577	1	1.39884
	PLAU	0.548065	4.3484	0.651085	1	1.46212
	FAM198B	0.235464	5.89716	0.643745	1	1.17729
	LOC110091149	1.78995	1.1671	1	1	3.45803
	ENPP2	0.429429	6.133	0.505158	1	1.3467
	ENPP1	0.219304	6.15439	0.682106	1	1.16417
	ENPP4	0.0279698	2.88273	0.887865	1	1.01958
	ENPP3	-0.80997	3.64379	0.533908	1	0.570394
	ENPP6	-1.93775	1.14366	1	1	0.261023
	ENPP5	0.440373	5.20648	0.411386	1	1.35696
	TRNAI-AAU	1.78995	1.1671	1	1	3.45803
	CARD10	-0.398299	4.66348	0.864178	1	0.758752
	ADAM11	1.06162	1.48826	1	1	2.08727
	ADAM10	0.238117	6.6487	0.718969	1	1.17945
	DHDDS	0.475205	4.88695	0.357544	1	1.39012
	ADAM19	0.227207	2.15927	0.793815	1	1.17057
	ADAM17	0.600556	6.62671	0.442686	1	1.5163
	BRMS1	0.237393	4.23763	0.548539	1	1.17886
	ADAM15	-0.287569	2.85123	1	1	0.819281
	LOC110091158	1.19967	2.54265	0.239764	1	2.29687
	CARD19	0.106135	5.13997	0.700795	1	1.07634
	ADAM12	0.508205	5.04064	0.363934	1	1.42228
	PLAA	0.314924	4.26824	0.483552	1	1.24395
	CARD14	-0.651487	4.36641	0.625443	1	0.636624
	CARD11	1.73756	1.15254	1	1	3.33471
	HTRA3	0.400088	4.61336	0.415305	1	1.31959
	HTRA1	0.540993	6.72089	0.489365	1	1.45497
	PLD5	2.63368	1.30192	0.544307	1	6.20605
	HTRA2	-0.421995	5.24463	0.80707	1	0.746392
	DAPP1	-0.192647	3.66757	1	1	0.874999
	PLD4	-0.217547	1.4607	1	1	0.860026
	PLD6	-1.76004	2.1666	0.323245	1	0.295239
	PLD1	0.181565	5.32775	0.627355	1	1.13411
	PLD3	0.56009	4.02015	0.322623	1	1.47436
	PLD2	0.103068	5.16813	0.705913	1	1.07406
	KCNV1	-2.71078	1.23576	1	1	0.152747
	GRK3	1.22768	2.86759	0.227169	1	2.3419
	GRK2	-0.0134085	5.18488	0.818291	1	0.990749
	LOC110091167	0.0523319	2.44959	0.841701	1	1.03694
	GRK5	-1.04372	7.48925	0.305948	1	0.485077
	GRK7	2.63368	1.30192	0.544307	1	6.20605
	GRK6	0.846231	3.88811	0.223196	1	1.7978
	PIBF1	0.310105	4.46416	0.512933	1	1.2398
	LOC110091161	0.170029	5.8511	0.691236	1	1.12508
	LOC110091163	0.448775	4.79834	0.384962	1	1.36488
	FAM199X	-0.12412	4.83363	0.909634	1	0.917564
	IGF2R	0.369382	7.89879	0.710128	1	1.2918
	BSPRY	1.78995	1.1671	1	1	3.45803
	LOC110091177	-0.221436	3.76707	1	1	0.857711
	LOC110091176	-0.149552	3.06723	1	1	0.90153
	LOC110091179	-0.654766	2.77413	0.751104	1	0.635178
	LOC110091178	0.561392	1.93826	0.751445	1	1.47569
	LOC110091171	0.652842	5.07406	0.27693	1	1.57226
	LOC110091170	0.477479	3.29076	0.4304	1	1.39231
	LOC110091173	-0.307283	4.70862	0.933495	1	0.808163
	LOC110091172	-0.192141	3.73374	1	1	0.875306
	LOC110091175	2.53857	1.91535	0.233776	1	5.81012
	LOC110091174	-0.0869826	4.95209	0.889988	1	0.94149
	ZMYND15	2.48092	1.25269	1	1	5.58253
	ZMYND19	0.538033	1.76812	1	1	1.45199
	PLEK	-0.185399	1.43052	1	1	0.879406
	GRM1	4.12175	1.71864	0.122454	1	17.4088
	PITPNC1	0.556088	5.43761	0.357205	1	1.47028
	GRM3	1.73756	1.15254	1	1	3.33471
	GRM4	1.78995	1.1671	1	1	3.45803
	GRM7	-2.93552	1.83604	0.121736	1	0.130713
	GRM6	3.82543	1.59217	0.193073	1	14.1765
	GRM8	0.924844	2.07112	0.425947	1	1.89848
	CA4	-2.06826	1.59413	0.683287	1	0.238448
	ZIC1	1.73756	1.15254	1	1	3.33471
	LOC110091180	1.0715	2.96881	0.262448	1	2.10162
	CA6	2.63368	1.30192	0.544307	1	6.20605
	MYBL2	0.399759	3.6125	0.466841	1	1.31929
	CA9	1.78995	1.1671	1	1	3.45803
	CA8	3.70155	1.55895	0.315863	1	13.01
	LOC110091181	-0.432198	3.71522	0.932367	1	0.741132
	LOC110091184	0.300078	1.95685	1	1	1.23121
	CUNH12orf29	0.481181	4.92596	0.376422	1	1.39589
	LOC110091183	0.200842	3.37162	0.594661	1	1.14937
	MYBL1	0.13577	3.8672	0.704236	1	1.09868
	LOC110091185	0.239659	1.68841	1	1	1.18071
	SUN3	-0.236195	2.48243	1	1	0.848981
	SUN2	0.343845	5.92732	0.553885	1	1.26913
	SUN1	0.430727	8.00773	0.671025	1	1.34791
	ATP6AP1	0.607134	5.58513	0.32486	1	1.52323
	ATP6AP2	0.406704	6.75408	0.627615	1	1.32565
	CAD	-0.33641	5.33998	0.879572	1	0.79201
	HUNK	-1.2484	1.61196	0.683189	1	0.420916
	ELF1	0.511259	7.36169	0.583947	1	1.42529
	CFAP100	-2.03161	1.16353	1	1	0.244582
	ELF2	0.45694	6.36857	0.515262	1	1.37263
	ELF3	1.33399	5.14369	0.0562597	1	2.52099
	GFOD1	0.725372	5.18632	0.231715	1	1.65333
	CUNH12orf10	-0.47121	4.38322	0.830972	1	0.721359
	ELF5	1.82555	1.17822	1	1	3.54441
	GFOD2	0.603855	5.1663	0.302081	1	1.51977
	CAT	0.104395	6.03831	0.767221	1	1.07504
	LOC110091191	0.21783	4.04822	0.588297	1	1.16298
	ZMYND10	-0.527413	2.49157	0.535424	1	0.693798
	ZMYND11	0.548957	7.82259	0.576781	1	1.46303
	ZMYND12	0.467387	2.36329	0.671759	1	1.3826
	SHANK2	-0.347338	4.12376	1	1	0.786033
	SHANK1	0.296238	4.81974	0.488156	1	1.22794
	PLEC	0.353821	9.88327	0.771391	1	1.27794
	RRN3	0.520559	5.84661	0.410149	1	1.43451
	DAPL1	1.09655	4.95208	0.0966889	1	2.13843
	CBL	0.548643	4.81575	0.327236	1	1.46271
	SV2C	-0.857693	5.80895	0.406283	1	0.551834
	SV2A	2.3113	2.27249	0.0898171	1	4.9633
	CUNH12orf43	-2.08598	2.51576	0.107159	1	0.235536
	TBX22	-1.95442	1.83881	0.470076	1	0.258025
	CUNH12orf45	0.039423	4.21546	0.761663	1	1.0277
	TBX20	2.48092	1.25269	1	1	5.58253
	CLVS2	1.78995	1.1671	1	1	3.45803
	CUNH12orf49	0.093683	4.82739	0.701779	1	1.06709
	RRM1	-0.418642	5.26366	0.810069	1	0.748129
	RRM2	0.642335	5.84737	0.3293	1	1.56085
	HS3ST5	-1.93775	1.14366	1	1	0.261023
	HS3ST6	4.8324	2.03337	0.0537135	1	28.4903
	SUOX	0.742978	4.80619	0.220239	1	1.67363
	HS3ST1	-0.216314	5.2951	1	1	0.860762
	CD2	1.78995	1.1671	1	1	3.45803
	TBX15	-4.09299	1.56128	0.193305	1	0.0585985
	CCS	0.0154686	3.78815	0.748406	1	1.01078
	CD6	2.57027	1.28052	1	1	5.9392
	CD9	0.664973	8.31415	0.533433	1	1.58554
	VPS29	0.410431	5.35255	0.451057	1	1.32908
	CDA	0.317501	3.21997	0.553674	1	1.24617
	FRMPD4	-2.03161	1.16353	1	1	0.244582
	FRMPD1	-0.0941316	3.71658	0.932363	1	0.936836
	GRPR	1.97207	1.74658	0.470815	1	3.92329
	ELK1	0.739222	4.71125	0.232568	1	1.66928
	RRP8	0.962384	3.40603	0.202538	1	1.94853
	RRP9	0.73448	4.78115	0.210047	1	1.6638
	ELK3	0.663259	5.44133	0.285775	1	1.58366
	ELK4	0.505679	5.97098	0.434058	1	1.41979
	ALCAM	0.0591736	8.32294	0.938399	1	1.04187
	VPS35	0.319261	6.21788	0.602476	1	1.24769
	VPS36	0.427895	6.75041	0.572563	1	1.34527
	VPS39	0.565378	6.01812	0.40063	1	1.47977
	VPS18	0.727446	6.30853	0.332654	1	1.65571
	CLEC11A	-1.23809	5.03915	0.196088	1	0.423933
	HUS1	-0.631061	5.2437	0.604849	1	0.645701
	CEL	0.547377	3.02385	0.50458	1	1.46143
	NUP93	0.450469	5.08694	0.395924	1	1.36648
	BCAN	-0.619256	3.20013	0.906424	1	0.651006
	BCAM	0.783153	7.51032	0.409461	1	1.72089
	HECW2	-0.183176	3.70528	1	1	0.880762
	HECW1	2.02321	2.08204	0.16783	1	4.06487
	TARS2	0.487577	5.72611	0.414268	1	1.40209
	SRFBP1	0.352281	5.49645	0.503155	1	1.27658
	NUP98	0.232129	6.03621	0.661356	1	1.17457
	VPS25	-0.560299	4.26557	0.727553	1	0.678161
	VPS28	-0.584152	4.31775	0.696713	1	0.667041
	CFD	-0.333575	2.07613	1	1	0.793568
	CFI	-0.380599	3.44271	0.919649	1	0.768118
	CFP	0.543664	2.36885	0.671572	1	1.45767
	RRP7A	0.635934	4.74701	0.266814	1	1.55394
	NUP85	0.527707	5.95072	0.417692	1	1.44164
	RRS1	0.0642434	4.56794	0.706106	1	1.04554
	ST3GAL4	-0.0447858	4.19715	0.855681	1	0.969434
	VPS11	-0.315306	5.11447	0.903653	1	0.80368
	ST3GAL5	0.0400344	4.87571	0.76891	1	1.02814
	NUP88	0.530722	4.33508	0.316721	1	1.44465
	ST3GAL6	0.110579	4.08784	0.694588	1	1.07966
	ST3GAL1	1.49306	4.84679	0.0373875	1	2.81484
	ST3GAL2	0.686181	3.35948	0.33317	1	1.60902
	VPS16	0.544312	4.56948	0.321734	1	1.45832
	ST3GAL3	-0.11771	4.19862	0.902082	1	0.92165
	PLK4	0.254991	4.44525	0.541138	1	1.19333
	NFE2	-4.56332	1.72677	0.122403	1	0.0422964
	PLK3	0.393181	3.92939	0.468767	1	1.31329
	ARL14EP	0.141763	5.52283	0.697178	1	1.10325
	APOOL	-0.643713	3.97653	0.723124	1	0.640064
	MCAM	0.602782	3.21576	0.404258	1	1.51864
	PLK2	0.369584	6.17322	0.56157	1	1.29198
	PLK1	-0.48488	3.45691	0.919582	1	0.714557
	CGN	0.441818	5.31502	0.418129	1	1.35831
	MCAT	0.199714	3.79097	0.629697	1	1.14847
	GTF2IRD1	0.104579	5.31725	0.718988	1	1.07518
	LOC110078097	-0.185917	3.28063	1	1	0.87909
	LOC110078098	-3.61121	2.80371	0.00191219	0.132545	0.0818307
	LOC110078099	1.82324	2.09101	0.167759	1	3.53875
	BPIFC	1.73756	1.15254	1	1	3.33471
	LOC110078089	-0.910977	3.07251	0.606012	1	0.531825
	MOCS2	-3.56233	2.18426	0.02619	0.959879	0.0846509
	MOCS3	-0.139963	3.32002	1	1	0.907543
	STON1	0.356445	6.21907	0.575755	1	1.28027
	CHM	-0.117961	4.12318	0.899182	1	0.921489
	STON2	-0.00969996	6.34633	0.966297	1	0.993299
	MCEE	0.617209	3.05243	0.437045	1	1.5339
	LOC110078081	0.0198173	1.72528	1	1	1.01383
	ELOA	-0.374217	5.34721	0.842069	1	0.771524
	ELOB	-0.0113394	5.35469	0.842207	1	0.992171
	ELOC	0.685448	3.52378	0.279973	1	1.6082
	RRP12	0.275337	5.39729	0.560491	1	1.21028
	CIC	0.507699	5.7325	0.406327	1	1.42178
	RRP15	0.710114	4.30927	0.250585	1	1.63593
	EDARADD	-0.117926	4.21071	0.904939	1	0.921511
	RPS6KL1	2.48092	1.25269	1	1	5.58253
	LOC110080396	-2.71078	1.23576	1	1	0.152747
	EXOC8	0.683925	5.31649	0.271382	1	1.6065
	PLLP	1.13242	2.22584	0.322695	1	2.19226
	EXOC7	0.23286	6.10679	0.659419	1	1.17516
	LOC110080394	2.48092	1.25269	1	1	5.58253
	CIT	-0.385772	4.93454	0.861316	1	0.76537
	EXOC4	0.266901	5.25864	0.551887	1	1.20322
	LOC110078071	0.102665	6.14273	0.776634	1	1.07376
	EXOC3	-0.0251918	5.70795	0.866679	1	0.98269
	PLIN2	0.517079	6.15006	0.444023	1	1.43106
	EXOC6	0.295626	6.19262	0.620632	1	1.22742
	EXOC5	0.399797	7.09848	0.624168	1	1.31932
	RCCD1	0.0039051	3.19385	0.906472	1	1.00271
	MOCS1	-0.295875	4.33242	1	1	0.814578
	EXOC2	0.462931	5.96163	0.466657	1	1.37834
	LOC110078077	0.845726	4.34633	0.176649	1	1.79717
	LOC110078067	1.78995	1.1671	1	1	3.45803
	NFIX	0.185803	9.68469	0.874635	1	1.13745
	PRUNE2	2.77804	2.02408	0.168296	1	6.85918
	PRUNE1	0.352966	2.94445	0.66953	1	1.27718
	LOC110080384	0.263286	6.80671	0.70287	1	1.20021
	METTL21A	-0.174442	3.69502	0.932434	1	0.88611
	RASSF10	0.483537	4.71401	0.352492	1	1.39817
	MINOS1	-0.0998335	5.3605	0.920808	1	0.933141
	RRP36	0.0752493	5.24099	0.742668	1	1.05354
	LOC110079390	-0.294047	1.2632	1	1	0.815611
	CKB	1.58384	4.40389	0.0274767	0.978945	2.99768
	PAIP2	0.397585	6.15829	0.530315	1	1.3173
	PAIP1	0.758611	6.67601	0.350129	1	1.69186
	LOC110079396	0.652582	2.25721	0.62789	1	1.57198
	LOC110078056	1.18621	5.13931	0.0800881	1	2.27553
	HIPK4	-2.71078	1.23576	1	1	0.152747
	BCHE	-0.920831	1.34316	1	1	0.528205
	CKM	-3.20008	1.32164	0.544307	1	0.108813
	MOCOS	0.956748	3.25897	0.240701	1	1.94093
	RFLNB	-0.29396	3.88434	0.676728	1	0.81566
	ELP2	-0.387885	5.35891	0.538627	1	0.764249
	G0S2	0.151707	3.37982	0.750149	1	1.11088
	ELP3	0.405103	4.63366	0.395367	1	1.32418
	RRP1B	0.505115	6.42777	0.489321	1	1.41924
	ELP4	-0.231864	5.18068	1	1	0.851534
	HIPK1	0.520199	8.84705	0.646542	1	1.43415
	ELP5	-0.673194	2.92573	0.767861	1	0.627117
	ELP6	-1.2204	3.29944	0.30681	1	0.429162
	HIPK3	1.0023	7.76475	0.328673	1	2.00319
	HIPK2	0.488223	5.77699	0.423535	1	1.40272
	RFLNA	0.0664244	4.57599	0.712628	1	1.04712
	NFIA	0.106265	9.40949	0.923571	1	1.07644
	NFIB	0.394762	9.03506	0.73019	1	1.31473
	NFIC	0.15669	4.78365	0.638037	1	1.11473
	PLP1	-2.86562	1.27369	1	1	0.137203
	FOSB	4.49268	1.86329	0.0801052	1	22.513
	LOC110078051	3.31196	1.43308	0.544307	1	9.93115
	PLP2	0.0118042	8.24701	0.977023	1	1.00822
	LOC110078054	-2.0884	2.13154	0.167445	1	0.235141
	TMEM229B	1.15739	2.88278	0.226511	1	2.23054
	FAM49A	0.740399	5.35728	0.241497	1	1.67064
	LOC110080366	-0.291221	3.27594	1	1	0.81721
	FAM49B	-0.979461	6.74092	0.290529	1	0.507169
	LOC110079378	2.57027	1.28052	1	1	5.9392
	LCLAT1	0.808533	5.61184	0.223622	1	1.75143
	LOC110080361	0.776934	4.16386	0.225243	1	1.71349
	CLU	0.646459	5.95816	0.343265	1	1.56532
	LOC110080360	-1.93775	1.14366	1	1	0.261023
	THG1L	-0.12676	4.60724	0.891817	1	0.915886
	PODNL1	0.550514	2.21204	0.628508	1	1.46461
	CFL2	-0.0242089	5.63247	0.858432	1	0.98336
	CFL1	0.609808	8.67688	0.586952	1	1.52606
	PLS3	0.465572	8.12389	0.647537	1	1.38087
	OIP5	0.33796	3.24781	0.645994	1	1.26397
	LOC110078043	-0.622119	3.45457	0.761694	1	0.649716
	IL13RA1	0.511939	5.90767	0.41668	1	1.42597
	PLS1	2.48092	1.25269	1	1	5.58253
	LOC110079374	1.82555	1.17822	1	1	3.54441
	KCMF1	0.226183	6.10571	0.798323	1	1.16974
	LOC110080354	1.73756	1.15254	1	1	3.33471
	LOC110081685	0.53866	1.38262	1	1	1.45262
	COL27A1	0.454736	3.26144	0.488298	1	1.37053
	FKBPL	-0.697395	2.06764	1	1	0.616685
	DIO1	1.83977	2.09882	0.167698	1	3.57952
	DIO2	-2.02343	7.08036	0.0491287	1	0.245973
	DIO3	1.29264	3.21271	0.155883	1	2.44976
	FAM91A1	0.402257	6.50594	0.568855	1	1.32157
	LEMD3	0.400939	6.87149	0.605881	1	1.32037
	LEMD2	0.167113	5.93793	0.712519	1	1.12281
	LEMD1	-1.04095	1.63843	1	1	0.486006
	TOM1L1	0.748242	5.41644	0.235746	1	1.67974
	TOM1L2	0.313139	5.37855	0.521526	1	1.24241
	FKBP8	-0.129544	4.51113	0.923185	1	0.91412
	FKBP7	0.325968	5.37919	0.508215	1	1.25351
	FKBP9	-0.501878	6.83703	0.662061	1	0.706187
	FKBP4	-0.00334646	6.227	0.885635	1	0.997683
	FKBP3	-0.471671	3.83955	0.877361	1	0.721129
	FKBP6	-0.69579	1.53424	1	1	0.617371
	LOC110078032	-0.506868	2.26794	1	1	0.703749
	FKBP5	0.515835	10.4607	0.683503	1	1.42982
	LOC110078023	0.233411	3.58567	0.643825	1	1.17561
	LOC110080342	0.945865	1.895	0.751641	1	1.92634
	FKBP2	-0.4046	3.61461	1	1	0.755446
	CNP	-0.0509202	6.90729	0.978592	1	0.96532
	LOC110081670	0.372378	2.64357	0.730917	1	1.29448
	TRNAV-UAC	-0.346169	2.4243	1	1	0.78667
	LOC110080339	1.19392	2.03122	0.426316	1	2.28773
	LOC110081669	1.00718	2.99718	0.261349	1	2.00998
	PLTP	0.427008	5.57518	0.588515	1	1.34444
	MCL1	0.359539	7.1661	0.682456	1	1.28302
	LOC110080333	-0.178682	5.03368	0.974249	1	0.88351
	LOC110081664	-0.885109	2.00622	1	1	0.541447
	LOC110081662	0.983871	3.48063	0.199143	1	1.97776
	LOC110078018	1.73756	1.15254	1	1	3.33471
	BCL9	0.833047	6.54584	0.295014	1	1.78144
	UBOX5	-0.181345	3.91416	0.9417	1	0.88188
	BCL6	1.14009	3.32818	0.17893	1	2.20395
	CPD	0.0960585	5.90351	0.764719	1	1.06885
	BCL3	0.947097	4.20339	0.150717	1	1.92799
	BCL2	0.902421	5.37647	0.17198	1	1.8692
	CPE	-0.510078	3.80479	0.813567	1	0.702184
	LOC110080327	-2.71078	1.23576	1	1	0.152747
	LOC110082989	3.71708	1.56422	0.315826	1	13.1508
	SLC48A1	0.443303	5.43967	0.426929	1	1.35971
	OSCP1	-0.0221997	3.92084	0.826188	1	0.98473
	LOC110079332	4.34178	1.80756	0.0803946	1	20.2772
	CPM	-0.997763	4.22293	0.371829	1	0.500776
	LOC110081652	1.73756	1.15254	1	1	3.33471
	LOC110082987	-0.334087	2.32803	1	1	0.793286
	LOC110081650	0.668014	5.81821	0.317933	1	1.58888
	LOC110082988	0.539979	3.85402	0.347856	1	1.45395
	MCM7	-0.264252	4.40033	1	1	0.83263
	ZC3H4	0.640066	5.30819	0.295451	1	1.5584
	CPQ	-1.56669	1.71963	0.47104	1	0.337581
	COL14A1	0.670035	7.97593	0.510976	1	1.59111
	MCM8	-0.479344	3.03713	0.89456	1	0.717304
	ZC3H3	0.516714	3.71264	0.400813	1	1.43069
	MCM9	-0.463101	4.6895	0.797777	1	0.725426
	LOC110081654	3.34658	1.44592	0.544307	1	10.1723
	ZC3H6	0.510305	6.74219	0.517586	1	1.42435
	CPZ	0.605599	4.35327	0.296505	1	1.52161
	KBTBD12	-1.99658	1.56432	0.683453	1	0.250593
	VPS72	-1.0991	4.08394	0.312237	1	0.466809
	CEP170B	0.988352	7.38387	0.294687	1	1.98392
	EVI5L	0.702499	7.21713	0.431776	1	1.62732
	OIT3	3.45058	1.48425	0.31646	1	10.9327
	LOC110079322	-0.308515	1.94669	1	1	0.807472
	CR1	0.732843	3.67778	0.290426	1	1.66191
	GGPS1	1.12327	3.52615	0.133678	1	2.1784
	DIS3	0.667459	6.72973	0.410206	1	1.58827
	SGIP1	1.82555	1.17822	1	1	3.54441
	LOC110081644	-0.163413	2.8535	1	1	0.892911
	APOA1	1.36475	1.80932	0.470307	1	2.57532
	LOC110070989	-2.71078	1.23576	1	1	0.152747
	LOC110070996	-2.28669	1.63569	0.31533	1	0.204945
	LOC110070995	-0.0983229	3.83748	0.87737	1	0.934118
	LOC110070998	-0.383617	2.69361	1	1	0.766513
	SAPCD2	0.92992	2.21553	0.498477	1	1.90517
	SAPCD1	-2.03161	1.16353	1	1	0.244582
	LOC110070994	-2.03161	1.16353	1	1	0.244582
	LOC110070993	1.73756	1.15254	1	1	3.33471
	LOC110080308	-0.579448	2.79607	0.87933	1	0.66922
	MCM3	-0.214817	5.85703	0.96074	1	0.861656
	MCM4	-0.338722	6.71947	0.732086	1	0.790741
	MCM5	-0.699055	5.36473	0.534547	1	0.615976
	LOC110070990	1.73756	1.15254	1	1	3.33471
	MCM6	-0.34127	6.30892	0.806484	1	0.789346
	LOC110082967	1.73756	1.15254	1	1	3.33471
	CRK	0.529493	6.11534	0.43073	1	1.44342
	LOC110079320	0.632517	1.36457	1	1	1.55027
	MCM2	-0.220751	5.85774	0.960744	1	0.858119
	LOC110080309	-0.203871	4.89809	1	1	0.868218
	HDAC4	0.531279	7.64835	0.575707	1	1.44521
	LOC110082964	1.06577	2.70019	0.23512	1	2.09329
	HDAC5	0.489432	7.59118	0.596983	1	1.40389
	CEBPA	-0.740464	1.52189	1	1	0.598547
	HDAC2	-2.51025	8.57175	0.0385198	1	0.175525
	CEBPB	1.40786	3.80617	0.0629862	1	2.65344
	HDAC3	0.0772727	5.84109	0.777488	1	1.05502
	CEBPD	1.02994	6.53508	0.208607	1	2.04194
	HDAC1	0.797733	6.19234	0.277445	1	1.73837
	CEBPE	-2.03161	1.16353	1	1	0.244582
	VPS4B	0.494934	7.22236	0.567245	1	1.40926
	LOC110081633	-0.646362	3.25656	0.818732	1	0.638889
	CEBPG	0.940454	7.17098	0.29918	1	1.91913
	VPS4A	-0.622515	5.02955	0.626763	1	0.649537
	TULP4	0.305443	6.78576	0.669634	1	1.2358
	TULP3	-0.183839	4.93099	1	1	0.880357
	TULP2	-0.118815	3.0276	0.894656	1	0.920944
	TULP1	-0.376942	1.92446	1	1	0.770068
	LOC110070978	0.259243	4.62043	0.528248	1	1.19685
	LOC110069992	-0.873501	3.34615	0.59532	1	0.545821
	HDAC8	-0.383691	3.40499	1	1	0.766474
	LOC110069991	0.586847	5.05562	0.318164	1	1.50196
	HDAC9	-1.01679	3.46586	0.426062	1	0.494215
	LOC110070977	0.53866	1.38262	1	1	1.45262
	LOC110069990	-0.739136	2.32032	0.821793	1	0.599098
	HDAC6	-0.179913	4.95988	0.972686	1	0.882756
	HDAC7	0.667669	5.22296	0.272709	1	1.5885
	LOC110070979	3.75592	1.58082	0.315708	1	13.5096
	STOX2	0.502214	7.03257	0.544917	1	1.41639
	NFS1	0.278243	5.33363	0.556235	1	1.21272
	HECTD1	0.496262	8.4128	0.641102	1	1.41055
	HECTD2	0.486769	5.17156	0.382621	1	1.4013
	VPS51	-0.188648	5.32585	1	1	0.877428
	LOC110070980	0.948569	2.98932	0.261648	1	1.92996
	VPS50	0.1782	6.1404	0.717643	1	1.13147
	HECTD3	0.0483412	4.90871	0.748199	1	1.03408
	HECTD4	0.477378	5.22433	0.387007	1	1.39221
	SVBP	0.235521	4.40516	0.560691	1	1.17733
	VPS53	0.219312	5.20043	0.592658	1	1.16418
	LOC110070983	1.51239	1.55692	0.683495	1	2.85282
	VPS52	-0.776557	4.84081	0.497103	1	0.583758
	VPS54	0.532744	6.15217	0.438057	1	1.44668
	XIRP2	-0.861579	1.91237	0.751562	1	0.55035
	CSK	-0.269568	4.54159	1	1	0.829568
	BCO2	-0.456778	2.63015	1	1	0.728611
	BCO1	-2.71078	1.23576	1	1	0.152747
	STOX1	-1.82027	4.94077	0.0402954	1	0.283168
	SLC35A2	0.966647	4.38711	0.401116	1	1.95429
	MGME1	1.14624	2.26666	0.497161	1	2.21337
	SLC35A1	0.296199	4.91836	0.522812	1	1.2279
	SLC35A4	0.559268	6.94752	0.498701	1	1.47352
	SLC35A3	0.125565	3.69847	0.67072	1	1.09094
	LOC110081624	-0.784798	1.50951	1	1	0.580433
	LOC110079303	-2.71078	1.23576	1	1	0.152747
	LOC110069981	0.0894606	2.39495	0.842557	1	1.06397
	LOC110070967	-0.124787	3.23774	0.906145	1	0.917139
	LOC110070966	0.342044	3.50861	0.49714	1	1.26755
	CPPED1	0.607205	6.30031	0.399277	1	1.52331
	KBTBD11	0.2406	4.06659	0.5485	1	1.18148
	LOC110070969	0.344763	2.86485	0.645199	1	1.26994
	LOC110070968	-0.431234	4.88429	0.799112	1	0.741627
	LOC110069985	0.641389	2.21809	0.628467	1	1.55983
	MAB21L3	0.534281	2.35833	0.671928	1	1.44822
	ASXL1	-0.0524688	5.55295	0.882427	1	0.964285
	LOC110070974	1.73756	1.15254	1	1	3.33471
	LOC110069984	0.13875	3.59797	0.717955	1	1.10095
	LOC110069983	1.01485	2.7243	0.335401	1	2.02069
	LOC110070976	-0.0144309	1.71392	1	1	0.990047
	EVI2A	-2.71078	1.23576	1	1	0.152747
	LOC110070975	0.0037849	2.26414	1	1	1.00263
	ASXL3	0.925799	6.56849	0.253282	1	1.89974
	MAB21L1	-1.09484	3.20224	0.404766	1	0.468189
	LOC110070972	0.146544	3.16167	0.808695	1	1.10691
	ASXL2	0.971273	4.07422	0.150826	1	1.96057
	VPS41	0.571109	7.36547	0.525992	1	1.48567
	MAB21L2	-0.597172	4.58515	0.682057	1	0.661048
	LOC110070971	-0.351837	2.85386	1	1	0.783586
	CEBPZ	0.646152	6.36421	0.380446	1	1.56499
	VPS45	0.852472	4.43367	0.175943	1	1.80559
	BCOR	0.958207	6.03223	0.194399	1	1.94289
	EVI2B	4.3535	1.80042	0.121947	1	20.4425
	LOC110081619	4.85606	2.04707	0.0373109	1	28.9613
	LOC110081618	1.36182	5.47555	0.0624843	1	2.57009
	SLC35B3	0.817916	4.81269	0.190651	1	1.76286
	LOC110079410	0.66185	7.69408	0.496498	1	1.58211
	SLC35B2	0.205476	5.42165	0.618803	1	1.15307
	LOC110079411	1.85912	2.5166	0.107135	1	3.62787
	SLC35B4	0.364093	3.9019	0.452688	1	1.28707
	MISP3	3.10425	1.3962	0.544307	1	8.5995
	SLC35B1	0.255298	4.72405	0.533678	1	1.19358
	NFU1	0.543889	5.78243	0.3952	1	1.4579
	RPS6KA4	0.14052	6.41668	0.783393	1	1.1023
	RPS6KA3	0.562365	6.99149	0.502428	1	1.47669
	RPS6KA6	0.779529	5.85623	0.259552	1	1.71657
	RPS6KA5	0.350854	5.84846	0.549603	1	1.27532
	CUNHXorf36	-1.13193	1.95947	0.75135	1	0.456304
	CUNHXorf38	-0.84539	4.13101	0.475725	1	0.55656
	NIPAL1	-1.93775	1.14366	1	1	0.261023
	NIPAL2	0.86857	5.99621	0.230235	1	1.82585
	RPS6KA1	0.440299	7.03503	0.58866	1	1.35689
	NIPAL3	0.188746	3.5321	0.628522	1	1.13977
	ARFIP2	0.772901	4.39216	0.215469	1	1.7087
	LOC110081725	0.548323	4.61713	0.317111	1	1.46238
	GSC2	3.03681	1.37259	0.544307	1	8.20675
	ARFIP1	0.281891	6.09918	0.705069	1	1.21579
	SLC35A5	-0.595151	4.61638	0.653222	1	0.661975
	TANGO6	-0.280045	3.72366	1	1	0.823565
	LOC110081722	1.85823	2.88264	0.0582861	1	3.62562
	IL1R2	-2.86507	2.19657	0.122384	1	0.137255
	TANGO2	-1.86458	2.94674	0.155833	1	0.274603
	SLC35C2	-0.682192	3.08428	0.797031	1	0.623218
	SLC35C1	0.222431	4.31714	0.571471	1	1.1667
	TWSG1	-0.180537	6.65406	0.78651	1	0.882374
	LOC110081716	0.708693	1.81377	0.752026	1	1.63432
	LOC110081715	2.67993	1.97517	0.23324	1	6.40826
	GSAP	-0.14415	6.00272	1	1	0.904912
	LOC110081713	-0.943348	3.42498	0.476893	1	0.520025
	CFTR	0.0962427	3.29541	0.737593	1	1.06899
	SLC22A3	-1.90722	4.53958	0.0373672	1	0.266606
	SLC22A5	-0.310512	3.55719	1	1	0.806355
	SLC35D1	0.628788	6.11214	0.368765	1	1.54627
	SLC35D3	2.48092	1.25269	1	1	5.58253
	SLC35D2	0.817154	2.35321	0.390284	1	1.76193
	CRHR2	3.85391	1.60409	0.192984	1	14.4591
	GSE1	0.150053	6.29186	0.751167	1	1.10961
	LOC110081703	0.201749	4.07638	0.600074	1	1.15009
	FAM43A	-2.78782	1.25476	1	1	0.144805
	LOC110081709	-0.0499941	4.05471	0.842291	1	0.96594
	ARGLU1	0.579717	7.09964	0.50207	1	1.49456
	LOC110081707	0.867096	3.34944	0.233329	1	1.82399
	LOC110081706	-0.293109	6.53986	0.840071	1	0.816141
	SLC35E1	0.622102	4.81888	0.275525	1	1.53912
	SLC35E4	1.717	1.66027	0.47155	1	3.28752
	SLC35E3	1.13249	5.44328	0.0994113	1	2.19237
	CUNHXorf23	0.0972632	5.56729	0.736745	1	1.06974
	MPHOSPH10	0.642935	4.74465	0.266731	1	1.5615
	TECPR2	0.194697	6.07589	0.702133	1	1.14448
	TECPR1	0.347795	3.65169	0.533742	1	1.27261
	CUNHXorf21	-0.997866	1.36128	1	1	0.50074
	SLC35F6	0.549838	3.2	0.404851	1	1.46392
	SLC35F3	-3.43456	2.54179	0.0267266	0.966434	0.0924899
	FAM45A	0.452794	4.57901	0.403383	1	1.36869
	SLC35F2	0.148335	2.4748	0.841338	1	1.10829
	SLC35F5	0.557601	6.19426	0.424547	1	1.47182
	MCUB	0.12957	5.67168	0.71592	1	1.09397
	SLC35F1	2.16646	4.95645	0.00495999	0.303094	4.4892
	RSF1	0.512148	6.15606	0.447953	1	1.42617
	SIPA1L2	1.01893	6.43719	0.206295	1	2.02642
	SIPA1L3	0.744798	6.22059	0.306699	1	1.67574
	SIPA1L1	1.07857	7.27215	0.247954	1	2.11194
	GSG2	0.701072	4.56105	0.234844	1	1.62571
	GSG1	3.31196	1.43308	0.544307	1	9.93115
	SLC35G2	3.03681	1.37259	0.544307	1	8.20675
	SLC35G1	1.0257	2.69645	0.404047	1	2.03595
	TYK2	-0.170704	5.36705	0.980319	1	0.888409
	MTSS1	0.895067	6.64174	0.277411	1	1.8597
	NFX1	0.522367	6.82101	0.510654	1	1.43631
	C1QTNF12	-0.795661	3.97294	0.576373	1	0.576079
	AMER1	0.778972	5.51678	0.238209	1	1.71591
	AMER2	1.23217	2.54149	0.360721	1	2.3492
	MEGF6	-0.571683	6.26689	0.60835	1	0.672832
	TYMS	0.057463	4.19067	0.711518	1	1.04063
	RGPD4	0.425225	7.24809	0.678423	1	1.34278
	TYMP	-2.95368	1.87452	0.121513	1	0.129079
	EMC1	-0.0861191	5.46342	0.90992	1	0.942053
	EMC2	0.857398	5.23394	0.327605	1	1.81177
	EMC3	0.227831	5.17774	0.603622	1	1.17107
	SUSD4	1.78995	1.1671	1	1	3.45803
	EMC4	-0.196418	4.45287	1	1	0.872715
	SUSD3	-0.176475	2.84255	1	1	0.884862
	SUSD6	0.290409	5.89159	0.597966	1	1.22299
	EMC6	-0.108742	4.88738	0.913238	1	0.927396
	SUSD5	1.3155	1.5366	1	1	2.48889
	EMC7	0.40045	5.32121	0.455938	1	1.31992
	EMC8	0.316828	6.82596	0.664687	1	1.24559
	EMC9	0.251055	3.83394	0.580288	1	1.19008
	SVIL	0.542646	6.81248	0.498574	1	1.45664
	NFYA	0.576742	5.87722	0.376017	1	1.49148
	NFYB	0.0915295	5.36812	0.731005	1	1.0655
	SUSD2	-1.2161	1.6515	0.682977	1	0.430446
	NFYC	-0.037789	5.84171	0.881218	1	0.974147
	FAM46A	0.432172	6.21024	0.516016	1	1.34926
	SUSD1	0.168641	2.3775	0.842852	1	1.124
	SVIP	-1.04367	4.50394	0.297752	1	0.485093
	RSG1	-0.717297	3.09464	0.708633	1	0.608236
	SPCS3	-0.203892	4.64498	1	1	0.868205
	SPCS2	-0.145524	5.57559	0.966957	1	0.904051
	SPCS1	0.303007	5.38572	0.540893	1	1.23371
	LRRN4CL	0.819889	3.66668	0.214591	1	1.76527
	LOC110091018	-2.35464	1.63679	0.192746	1	0.195516
	QPCT	0.351956	5.60613	0.514907	1	1.27629
	NUPL2	0.297802	4.14447	0.523739	1	1.22927
	MEGF8	0.367037	6.2388	0.565863	1	1.2897
	TRNAK-UUU	-2.42959	1.65525	0.192614	1	0.185618
	LOC110091010	0.65437	4.62581	0.259177	1	1.57393
	SIPA1	-0.114256	2.20031	1	1	0.923859
	MEGF9	0.0728521	4.4243	1	1	1.05179
	SPPL2B	0.0753432	3.94871	0.665226	1	1.05361
	ROGDI	1.18938	2.95853	0.186118	1	2.28054
	SPPL2A	0.434592	6.10379	0.583975	1	1.35153
	LOC110091023	-1.93775	1.14366	1	1	0.261023
	LOC110091022	0.839975	1.66293	0.682916	1	1.79002
	PAIP2B	0.291665	5.50386	0.550148	1	1.22405
	LOC110091024	3.31196	1.43308	0.544307	1	9.93115
	EME1	1.06027	3.52498	0.174791	1	2.08533
	LOC110091029	-2.20048	2.43476	0.140695	1	0.217565
	FPGT	0.417993	4.67069	0.407075	1	1.33607
	FPGS	-0.61289	4.79806	0.638382	1	0.653885
	LOC110091020	0.456716	6.95245	0.571023	1	1.37241
	POSTN	-1.00994	7.70488	0.357803	1	0.496566
	TRPC4AP	0.0647718	7.17783	0.897798	1	1.04592
	EMCN	-1.75301	2.23258	0.322634	1	0.296682
	SPECC1L	0.329162	6.48248	0.622681	1	1.25628
	MYADM	0.386903	8.19027	0.71141	1	1.30758
	TIMELESS	-0.494902	4.68349	0.767198	1	0.70961
	LOC110091031	-1.08272	3.0082	0.404333	1	0.472137
	PMEL	2.16136	1.77196	0.329795	1	4.47336
	ISYNA1	1.67063	1.64354	0.683019	1	3.18354
	GSTCD	0.4342	4.5604	0.391729	1	1.35116
	CLEC16A	-0.256137	4.3824	1	1	0.837327
	PMF1	-0.947443	3.06893	0.502781	1	0.518551
	CAMSAP1	0.249672	5.97455	0.633077	1	1.18894
	CAMSAP2	0.65545	6.14386	0.353709	1	1.57511
	EMG1	0.435404	3.9168	0.416392	1	1.35229
	LOC110091047	0.759972	1.69394	0.682755	1	1.69346
	NPC1L1	-3.20008	1.32164	0.544307	1	0.108813
	TASP1	0.795611	5.93118	0.262327	1	1.73581
	AMELX	0.894065	6.28732	0.594972	1	1.8584
	LOC110091042	0.109719	5.21393	0.696588	1	1.07902
	PNPT1	0.579955	6.4513	0.440931	1	1.4948
	CAMSAP3	0.268242	4.91799	0.542809	1	1.20434
	DIAPH1	0.654123	6.91574	0.431352	1	1.57366
	DAP	0.393548	6.76376	0.598373	1	1.31362
	DIAPH2	0.42925	7.80087	0.654987	1	1.34653
	DIAPH3	0.610421	5.3392	0.319724	1	1.5267
	DAO	-0.340238	1.46519	1	1	0.789911
	PXMP2	1.3531	3.07394	0.105823	1	2.55461
	PXMP4	0.897901	2.826	0.274671	1	1.86335
	SKIV2L	-0.139343	3.87791	0.93959	1	0.907933
	LOC110091050	-0.973219	1.32975	1	1	0.509368
	COLGALT2	0.723657	3.2497	0.352627	1	1.65136
	DBI	0.75562	6.10542	0.294424	1	1.68836
	CLEC14A	-2.03161	1.16353	1	1	0.244582
	LOC110091069	0.434997	1.7696	1	1	1.35191
	DBP	-1.44964	4.0905	0.137622	1	0.366112
	NTMT1	0.426295	2.96513	0.582465	1	1.34378
	DBT	-0.031998	6.10437	0.904656	1	0.978065
	COLGALT1	0.0779132	5.44687	0.74609	1	1.05549
	SVOP	-0.309048	1.47516	1	1	0.807174
	STPG4	1.78995	1.1671	1	1	3.45803
	OXSR1	0.482588	6.49288	0.506681	1	1.39725
	DCK	-0.608778	4.82693	0.645525	1	0.655752
	DCN	-0.307338	9.76253	0.809145	1	0.808132
	CFAP221	3.91057	1.62783	0.192811	1	15.0383
	DCX	0.591462	1.78794	1	1	1.50677
	DNASE2	0.353197	6.00495	0.549689	1	1.27739
	DTHD1	-0.331789	1.65195	1	1	0.794551
	DDC	2.95895	1.3459	0.544307	1	7.77557
	CFAP206	0.488949	5.03945	0.377707	1	1.40342
	DDO	0.106595	3.53614	0.705964	1	1.07668
	LOC110091089	3.34658	1.44592	0.544307	1	10.1723
	PDE11A	2.60182	1.29122	1	1	6.07052
	RPS6KC1	0.458292	5.90069	0.462493	1	1.37391
	TYW1	0.633647	5.18963	0.282849	1	1.55148
	LOC110091081	-2.03161	1.16353	1	1	0.244582
	PDSS2	0.250889	4.66072	0.51415	1	1.18994
	LOC110091080	0.252493	4.74352	0.542588	1	1.19126
	PDSS1	0.197252	4.19914	0.583834	1	1.14651
	LOC110091083	0.377316	6.68105	0.672897	1	1.29892
	LOC110091084	-2.32901	2.00675	0.232966	1	0.19902
	LOC110091087	-2.03161	1.16353	1	1	0.244582
	LOC110091086	-3.39732	1.37605	0.544307	1	0.0949083
	ATP13A1	0.21785	5.55446	0.775902	1	1.163
	LOC110091090	1.78995	1.1671	1	1	3.45803
	DEK	0.592271	8.04722	0.567634	1	1.50762
	PDE10A	-0.345671	4.15443	0.950222	1	0.786942
	DES	0.560065	1.79585	1	1	1.47434
	RPS6KB1	0.732403	5.73594	0.271779	1	1.6614
	RPS6KB2	1.38175	3.3534	0.0962535	1	2.60585
	ATP13A4	0.729937	2.21209	0.628507	1	1.65857
	LOC110091091	-2.86562	1.27369	1	1	0.137203
	LOC110091094	3.5534	1.52397	0.31646	1	11.7403
	ATP13A2	-0.0857383	4.48339	0.843304	1	0.942302
	ATP13A3	-0.478929	4.30125	0.821591	1	0.71751
	LOC110091093	1.73756	1.15254	1	1	3.33471
	MDC1	-0.120322	4.8654	0.9115	1	0.919982
	SCAMP5	0.132515	4.83783	0.652015	1	1.0962
	SCAMP4	0.182264	4.03774	0.630518	1	1.13466
	LACTB	0.0979777	5.29991	0.714835	1	1.07027
	IGLON5	-2.03161	1.16353	1	1	0.244582
	CUNH9orf64	-0.202444	3.7295	1	1	0.869077
	TYW5	-0.586134	3.67294	0.728783	1	0.666126
	TYW3	0.975697	3.78891	0.188159	1	1.96659
	NGDN	0.116041	4.14048	0.703193	1	1.08376
	SCAMP1	0.425129	6.60486	0.558266	1	1.34269
	EML1	0.561301	5.77355	0.382155	1	1.4756
	HSPG2	0.0367085	6.58503	0.924271	1	1.02577
	EML2	0.337145	4.74102	0.459151	1	1.26325
	EML3	0.513486	4.93547	0.338719	1	1.42749
	CUNH14orf119	-1.19385	3.22158	0.353685	1	0.437134
	SCAMP2	0.523688	5.97576	0.51277	1	1.43763
	EML4	0.515753	7.60917	0.58146	1	1.42974
	EML5	0.580607	4.91736	0.315588	1	1.49548
	EML6	0.36274	2.15336	0.628908	1	1.28587
	PRKAR1B	-1.60549	1.93891	0.328265	1	0.328625
	PRKAR1A	0.720834	8.48243	0.516079	1	1.64813
	RBCK1	0.119607	4.42285	0.676954	1	1.08644
	CGGBP1	0.383388	5.98883	0.52572	1	1.3044
	NGEF	0.331327	6.67209	0.638913	1	1.25817
	DHH	2.63368	1.30192	0.544307	1	6.20605
	SHOX2	-0.106603	2.68143	1	1	0.928773
	AAAS	-0.0321711	4.14244	0.799716	1	0.977948
	C2	0.966567	3.3581	0.233046	1	1.95418
	DYNC2LI1	0.348357	4.39375	0.490742	1	1.27311
	C5	0.203491	3.20573	0.7237	1	1.15148
	GRIN2A	-0.920831	1.34316	1	1	0.528205
	C6	1.23296	3.45763	0.114456	1	2.35049
	HSPH1	0.898556	5.13622	0.157573	1	1.8642
	C7	2.01742	4.99974	0.00747057	0.41813	4.0486
	PRKAR2B	-0.276654	4.0728	1	1	0.825503
	CUNH9orf43	-2.69077	1.77415	0.122107	1	0.154881
	C9	1.08167	3.46628	0.153963	1	2.11649
	PRKAR2A	0.277571	6.97867	0.707929	1	1.21215
	RSU1	0.205082	5.44794	0.62854	1	1.15275
	EXPH5	0.531861	6.58962	0.482774	1	1.44579
	NGFR	-2.11607	2.41745	0.141339	1	0.230675
	PMM1	0.819239	4.72567	0.189255	1	1.76448
	PMM2	0.569372	5.60357	0.353098	1	1.48388
	GRIN2C	3.70155	1.55895	0.315863	1	13.01
	GRIN2B	2.63565	4.24489	0.00228886	0.155891	6.21454
	CP	1.80485	7.70921	0.0804821	1	3.49392
	GRIN2D	2.23155	2.77687	0.037212	1	4.69639
	CS	0.456397	6.90178	0.567728	1	1.37211
	GRIN3A	1.82555	1.17822	1	1	3.54441
	LAD1	0.334348	6.22558	0.595728	1	1.26081
	LOC110079299	-0.123309	5.39655	0.942698	1	0.918079
	LRSAM1	0.131038	3.87551	0.704158	1	1.09508
	LOC110080287	0.00385649	4.38354	0.748622	1	1.00268
	RPLP1	-0.199064	10.2515	0.878621	1	0.871116
	QPRT	-0.908122	2.04897	0.794253	1	0.532878
	RPLP0	0.108897	10.4514	0.929106	1	1.0784
	LOC110080280	-4.12183	1.5656	0.315816	1	0.057439
	ECSIT	-0.0662106	5.12299	0.880745	1	0.955143
	AACS	1.01599	3.46418	0.17586	1	2.02229
	NIPBL	-0.0165666	8.91005	0.987353	1	0.988583
	LOC110079290	-1.93775	1.14366	1	1	0.261023
	RPLP2	0.511201	10.2915	0.683198	1	1.42524
	CUNH9orf24	-0.294047	1.2632	1	1	0.815611
	LOC110079296	-2.71078	1.23576	1	1	0.152747
	LOC110079295	3.31196	1.43308	0.544307	1	9.93115
	APPL1	0.460796	6.83916	0.556241	1	1.3763
	ACTL6A	0.422014	4.95334	0.425958	1	1.3398
	NIPA1	1.80319	2.56007	0.19079	1	3.4899
	SIRT4	-0.262769	2.35648	1	1	0.833487
	SIRT5	0.602593	5.68554	0.346836	1	1.51844
	EMP1	0.0627463	8.81329	0.949492	1	1.04445
	EMP2	0.590352	5.32157	0.3218	1	1.50561
	SIRT6	-0.58988	3.31048	0.828191	1	0.664398
	SIRT7	0.956066	3.29639	0.207427	1	1.94001
	NIPA2	0.104502	4.88745	0.68883	1	1.07512
	EMP3	0.0341188	7.33	0.928647	1	1.02393
	F2	0.0529224	2.15456	1	1	1.03736
	F3	0.737808	6.23997	0.315333	1	1.66764
	SIRT1	0.227283	6.96081	0.748004	1	1.17063
	SIRT2	0.0885418	5.54367	0.733162	1	1.06329
	F5	1.26507	1.85924	0.469919	1	2.40339
	SIRT3	0.260716	2.95985	0.66912	1	1.19807
	F8	-3.35645	6.351	0.000799782	0.062794	0.0976356
	BDH2	-0.445213	5.09187	0.78298	1	0.734476
	CDC42EP5	0.300296	7.41844	0.721876	1	1.2314
	CDC42EP4	-0.109188	4.35583	0.871127	1	0.92711
	CDC42EP3	0.673659	7.15596	0.444993	1	1.59511
	CDC42EP2	-2.11669	2.37452	0.18463	1	0.230575
	CUNH9orf16	1.12897	1.96229	0.564841	1	2.18702
	LOC110079281	0.115357	1.68325	1	1	1.08324
	CDC42EP1	-1.81846	3.47067	0.0993131	1	0.283523
	PICK1	-0.432773	4.58533	0.854215	1	0.740836
	LOC110079283	0.675321	3.9057	0.288895	1	1.59695
	LOC110079284	0.339056	3.97415	0.521879	1	1.26493
	DLD	-0.0262381	7.03697	1	1	0.981978
	MDFI	0.204398	4.48	0.580627	1	1.15221
	LOC110081598	3.4671	1.49142	0.31646	1	11.0586
	FH	0.439241	6.20448	0.580385	1	1.35589
	LOC110080265	1.73756	1.15254	1	1	3.33471
	LOC110080264	0.112423	6.3847	0.801919	1	1.08104
	ARL14EPL	1.73756	1.15254	1	1	3.33471
	CCNDBP1	-0.388653	3.65338	0.929585	1	0.763842
	LOC110080261	1.82555	1.17822	1	1	3.54441
	LOC110080260	0.346345	4.34237	0.438952	1	1.27134
	MYCT1	-0.338822	2.06364	1	1	0.790687
	PMS2	0.149249	4.10626	0.651662	1	1.10899
	DMD	0.480492	7.32676	0.587116	1	1.39522
	LOC110079272	0.285199	5.92277	0.596669	1	1.21858
	CSMD3	-1.91737	3.74146	0.0522046	1	0.264736
	CSMD2	-0.0202179	2.01969	1	1	0.986084
	CSMD1	1.08566	3.78276	0.135832	1	2.12234
	PMS1	0.598901	5.58312	0.346509	1	1.51456
	LOC110081587	1.82555	1.17822	1	1	3.54441
	LOC110081584	0.0289902	3.17842	0.808432	1	1.0203
	GK	0.505219	1.95169	0.751385	1	1.41934
	MDH1	0.170297	7.12349	0.805426	1	1.12529
	AADAT	0.629095	5.57483	0.318678	1	1.5466
	MDH2	0.436965	6.26792	0.52195	1	1.35375
	TTLL7	0.101534	3.48008	0.692742	1	1.07291
	TTLL6	-1.12806	1.36602	1	1	0.457531
	TTLL5	0.272277	5.1504	0.556533	1	1.20771
	TTLL4	0.00724187	4.68423	0.767211	1	1.00503
	AADAC	1.08903	3.8922	0.122629	1	2.12732
	TTLL2	1.73756	1.15254	1	1	3.33471
	TTLL1	2.20225	2.46966	0.108516	1	4.60196
	RIMBP2	-4.70918	1.78613	0.122034	1	0.0382292
	TTLL9	-1.33352	1.86722	0.751771	1	0.396799
	TTLL8	1.35011	1.54891	1	1	2.54932
	HDDC2	-0.557571	3.04742	0.894458	1	0.679445
	FAM13B	0.20357	7.16569	0.78229	1	1.15154
	FAM13C	2.21205	3.42141	0.0207777	0.827157	4.63334
	UBE2D2	0.306642	7.63739	0.733024	1	1.23683
	LOC110080246	0.398731	4.26884	0.41246	1	1.31835
	FAM13A	0.169893	7.48803	0.829574	1	1.12497
	UBE2D3	0.167286	7.99282	0.868889	1	1.12294
	UBE2D1	0.438494	6.00038	0.491578	1	1.35519
	LOC110080240	-0.129225	4.91501	0.914945	1	0.914323
	HDDC3	-0.208617	4.15335	1	1	0.865366
	PMPCB	-0.0446202	6.56538	0.950023	1	0.969545
	PMPCA	0.111958	4.25982	0.679888	1	1.08069
	LOC110079251	0.0928311	6.27765	0.809903	1	1.06646
	LOC110081564	1.15124	1.96368	0.56483	1	2.22104
	LOC110081563	0.534968	2.54856	0.58803	1	1.44891
	IK	0.101587	6.65697	0.835671	1	1.07295
	LAG3	1.73756	1.15254	1	1	3.33471
	LOC110079246	0.181189	5.15914	0.620765	1	1.13382
	LOC110079248	-0.404969	3.76405	0.934964	1	0.755253
	UBE2E3	0.750003	7.25127	0.405929	1	1.6818
	LOC110080236	0.536676	6.06382	0.425321	1	1.45063
	VPS33A	-0.347706	5.35604	0.673588	1	0.785833
	VPS33B	0.013591	5.45851	0.819687	1	1.00947
	UBE2E1	0.303814	6.14415	0.604589	1	1.2344
	LOC110082891	1.43902	3.45397	0.0699603	1	2.71137
	LOC110082892	1.78995	1.1671	1	1	3.45803
	EMSY	0.505177	5.50774	0.400345	1	1.4193
	NSMAF	0.849654	4.93894	0.175775	1	1.80207
	LOC110082886	-3.46755	3.64563	0.001108	0.0835139	0.0903991
	LOC110081553	0.827828	3.81823	0.227966	1	1.77501
	LOC110082889	1.78995	1.1671	1	1	3.45803
	LOC110080220	-0.429707	2.98953	1	1	0.742412
	LOC110079238	0.295814	6.49019	0.652795	1	1.22758
	FBLIM1	0.553605	6.50148	0.46074	1	1.46775
	LOC110079237	-0.402801	5.09037	0.853245	1	0.756388
	LOC110080226	-0.400908	4.1269	0.899171	1	0.757382
	LOC110081556	-0.325159	2.93405	1	1	0.798211
	ECSCR	1.24793	2.01433	0.426474	1	2.375
	DPT	-0.119694	5.21659	0.933108	1	0.920383
	TNFRSF11B	-0.215031	2.91706	1	1	0.861528
	TNFRSF11A	0.179931	4.42073	0.601972	1	1.13283
	NTPCR	0.078309	5.16382	0.72559	1	1.05578
	SOCS2	0.376589	2.26472	0.823	1	1.29827
	SOCS3	1.53243	5.29101	0.0380759	1	2.89273
	SOCS1	1.1471	3.23441	0.155184	1	2.21468
	PMVK	-0.380194	4.42521	0.917251	1	0.768334
	SOCS6	0.444898	5.78933	0.458853	1	1.36122
	LOC110079230	-0.308676	2.65337	1	1	0.807382
	SOCS7	0.511666	4.83414	0.337374	1	1.4257
	SOCS4	0.527148	4.62615	0.346048	1	1.44108
	MDN1	0.768172	7.55886	0.421894	1	1.70311
	SOCS5	0.397203	5.74512	0.487878	1	1.31695
	LOC110081543	0.341164	4.6859	0.469275	1	1.26678
	COL28A1	-0.00190023	4.64073	0.792755	1	0.998684
	LOC110079223	-0.91016	1.97703	1	1	0.532126
	KL	0.868774	1.93263	0.565072	1	1.82611
	LOC110080210	4.32245	1.79867	0.121958	1	20.0072
	DR1	0.764932	6.01079	0.283283	1	1.69929
	LOC110081541	-0.451558	2.37706	1	1	0.731253
	BRPF1	0.685918	4.61092	0.233934	1	1.60872
	LOC110082878	2.57027	1.28052	1	1	5.9392
	BDNF	3.45577	2.45015	0.0361281	1	10.9721
	BRPF3	1.30273	4.58917	0.0622847	1	2.46695
	GFPT2	0.646718	5.12051	0.284521	1	1.5656
	LOC110082873	-0.845278	5.11051	0.42646	1	0.556603
	LOC110080213	2.12434	2.82906	0.0595398	1	4.36004
	GFPT1	-0.0596972	6.85423	0.983205	1	0.959465
	BCDIN3D	-0.877095	2.68221	0.620747	1	0.544463
	LOC110070897	2.61148	2.76504	0.0298632	1	6.1113
	ZC3HC1	0.21181	3.52076	0.628738	1	1.15814
	LOC110070896	0.64904	2.7927	0.442534	1	1.56812
	LOC110070899	2.36872	1.89189	0.328679	1	5.16484
	TFCP2	0.943001	6.70279	0.255959	1	1.92252
	LOC110070898	-1.03372	1.57571	1	1	0.488448
	LOC110070893	-0.813386	1.78244	1	1	0.569045
	LOC110070895	-0.77242	1.90793	0.751582	1	0.585435
	LOC110070894	-0.995312	1.75755	1	1	0.501627
	MDM2	0.0985155	5.52716	0.729696	1	1.07067
	AAK1	0.0186854	4.17624	0.754458	1	1.01304
	MDM4	0.654584	7.54617	0.488992	1	1.57416
	LOC110081537	3.76358	1.58343	0.31569	1	13.5816
	LOC110070890	1.01865	1.7733	0.470596	1	2.02602
	LOC110082869	-1.15617	3.95647	0.280504	1	0.448702
	MYD88	0.255254	2.49501	0.704826	1	1.19355
	MDM1	-0.213171	2.55852	1	1	0.862639
	LOC110080201	3.5534	1.52397	0.31646	1	11.7403
	ST6GALNAC1	-1.20749	1.79128	0.682271	1	0.43302
	LOC110082867	-3.55853	1.40212	0.544307	1	0.0848744
	ST6GALNAC2	0.812251	2.45437	0.545623	1	1.75595
	SH2D4A	1.15529	2.16956	0.323217	1	2.22729
	LOC110081536	-0.180302	4.23768	0.953096	1	0.882518
	LOC110079215	-2.03161	1.16353	1	1	0.244582
	LOC110080203	1.97282	3.63648	0.0247854	0.932007	3.92534
	LOC110069893	4.86864	2.0513	0.0372972	1	29.215
	LOC110070879	1.0118	1.77105	0.470615	1	2.01643
	LOC110069892	1.00165	2.13127	0.425409	1	2.0023
	ATRAID	0.851551	2.18592	0.628684	1	1.80444
	LOC110069890	-0.781464	2.21008	0.823515	1	0.581776
	MRPL4	0.827769	4.73281	0.179483	1	1.77494
	MRPL3	0.216325	5.74084	0.636522	1	1.16177
	MRPL2	0.283631	5.84502	0.595197	1	1.21725
	MRPL1	0.0585038	4.73139	0.743677	1	1.04139
	LOC110069894	2.52538	1.26662	1	1	5.75726
	LOC110070882	0.28087	3.26379	0.645588	1	1.21493
	MB	-3.20008	1.32164	0.544307	1	0.108813
	LOC110070881	0.0245818	2.55822	0.857474	1	1.01718
	LOC110070884	1.90435	3.31363	0.0351269	1	3.74339
	LOC110070883	0.237855	3.53756	0.570275	1	1.17924
	DSE	-0.063226	4.48332	0.843303	1	0.957122
	LOC110069898	-0.238206	2.38561	1	1	0.847799
	DGCR8	0.0432055	6.31998	0.859851	1	1.0304
	LOC110070880	0.879941	2.85976	0.371856	1	1.8403
	MRPL9	-0.0394973	4.89286	0.829003	1	0.972994
	SPG11	0.22163	7.04268	0.784316	1	1.16605
	DGCR2	0.128498	7.15061	0.839226	1	1.09316
	LOC110079201	3.07597	1.3859	0.544307	1	8.43256
	DSP	0.349821	12.89	0.794658	1	1.2744
	LOC110081520	0.327539	3.32958	0.57427	1	1.25487
	LOC110081525	1.02887	1.75123	0.470777	1	2.04043
	DST	0.172691	12.674	0.896946	1	1.12716
	LOC110081524	-2.86562	1.27369	1	1	0.137203
	LOC110081523	-0.804767	7.25506	0.42033	1	0.572455
	SH2D3C	-0.619306	2.64158	1	1	0.650984
	VPS37C	0.149549	5.57751	0.677787	1	1.10922
	RAD23A	0.679198	5.79077	0.306464	1	1.60125
	VPS37A	0.322037	5.71541	0.550419	1	1.25009
	VPS37B	-0.127723	5.05962	0.924304	1	0.915275
	LOC110069882	0.0946163	4.14717	0.703139	1	1.06778
	RAD23B	0.412361	7.90019	0.671752	1	1.33086
	LOC110069881	-0.0724334	4.80789	0.846772	1	0.951033
	LOC110069880	0.045943	4.63113	0.756392	1	1.03236
	LOC110070875	0.475529	7.20375	0.601465	1	1.39043
	LOC110069886	0.104392	3.4076	0.678494	1	1.07504
	LOC110069885	-0.174393	2.61028	1	1	0.88614
	LOC110069884	-1.216	3.13871	0.375723	1	0.430473
	LOC110070877	0.627903	2.78788	0.442772	1	1.54532
	LOC110069883	-0.928775	2.3803	0.671194	1	0.525304
	LOC110070871	-0.0648864	3.2117	0.906337	1	0.956021
	LOC110070870	0.424778	2.4008	0.67054	1	1.34237
	LOC110069888	3.37199	1.45591	0.31646	1	10.3531
	IL1RAPL2	0.154979	1.77246	1	1	1.11341
	IL1RAPL1	-2.34506	3.68561	0.00979916	0.488777	0.196819
	LOC110070872	-0.859117	2.39641	0.670677	1	0.55129
	LOC110069887	-0.28628	4.07769	1	1	0.820014
	LOC110081518	2.57027	1.28052	1	1	5.9392
	ST6GALNAC3	-1.87983	2.36367	0.309939	1	0.271716
	BDP1	0.542251	7.68061	0.571132	1	1.45624
	LOC110082846	-2.03161	1.16353	1	1	0.244582
	DTL	0.757682	3.25594	0.308387	1	1.69077
	ST6GALNAC4	0.422936	3.30192	0.512466	1	1.34065
	ST6GALNAC5	-1.55482	3.05046	0.21916	1	0.340372
	ST6GALNAC6	0.369035	2.97201	0.582245	1	1.29149
	LOC110082842	0.932471	3.09313	0.251922	1	1.90854
	LOC110081510	0.445887	4.65169	0.37636	1	1.36215
	RNFT2	0.493099	3.99757	0.398782	1	1.40747
	COL15A1	0.984593	6.73082	0.246252	1	1.97876
	SLC47A1	0.509159	4.74586	0.346731	1	1.42322
	LOC110081511	0.710591	6.13351	0.321564	1	1.63647
	LOC110082841	3.02574	1.3696	0.544307	1	8.14402
	HSD17B12	0.396394	6.83759	0.606078	1	1.31621
	HSD17B10	-0.144632	5.55255	0.98315	1	0.90461
	LOC110070859	-0.480022	4.86821	0.768795	1	0.716967
	LOC110070858	0.0485381	2.66179	0.86997	1	1.03422
	RNFT1	-0.189882	5.16887	1	1	0.876678
	CUNH9orf85	0.399998	4.53505	0.413456	1	1.31951
	LOC110069874	0.978302	2.3536	0.390264	1	1.97015
	LOC110069873	-1.22032	1.84148	0.751892	1	0.429186
	LOC110070865	1.78995	1.1671	1	1	3.45803
	SLITRK2	1.71687	1.60893	0.683206	1	3.28723
	LOC110070860	-0.530757	3.45746	0.843889	1	0.692191
	PTPRZ1	-0.142821	3.44373	0.919644	1	0.905746
	LOC110069879	0.53866	1.38262	1	1	1.45262
	SLITRK1	0.10345	2.01898	1	1	1.07434
	LOC110069877	0.0699959	3.78999	0.748385	1	1.04971
	SLITRK3	0.707402	2.34607	0.493095	1	1.63286
	LOC110069876	-0.49374	5.39317	0.718596	1	0.710181
	SLITRK6	0.950489	6.13166	0.206311	1	1.93253
	LOC110082839	2.95895	1.3459	0.544307	1	7.77557
	SLITRK5	1.62311	2.68259	0.119159	1	3.08038
	AAMP	0.509188	6.03655	0.439743	1	1.42325
	LOC110082838	-0.618371	1.66495	1	1	0.651406
	LINGO2	1.26521	1.77431	0.795484	1	2.40363
	DUT	-0.875122	4.54928	0.44746	1	0.545208
	LINGO4	-0.269056	2.89932	1	1	0.829863
	LINGO3	1.31113	3.35789	0.154457	1	2.48135
	LOC110082834	2.63368	1.30192	0.544307	1	6.20605
	LOC110070849	-2.03161	1.16353	1	1	0.244582
	LOC110070846	-3.73021	1.45438	0.31646	1	0.0753522
	BAIAP2	0.222984	5.95704	0.660729	1	1.16714
	LOC110070845	2.48092	1.25269	1	1	5.58253
	LOC110070847	4.26414	1.77192	0.122121	1	19.2147
	LOC110070852	0.143913	4.63483	0.625259	1	1.1049
	CUNH9orf72	-0.0259262	5.19329	0.842009	1	0.98219
	LOC110070854	-5.23623	2.038	0.0373403	1	0.02653
	PC	-0.861129	4.16621	0.48904	1	0.550522
	CUNH9orf78	0.021556	4.10889	0.747448	1	1.01505
	LOC110069868	-1.05025	1.34792	1	1	0.482883
	LOC110070851	-2.91831	1.88218	0.234082	1	0.132282
	LOC110069865	-1.23529	2.38046	0.548608	1	0.424757
	VIPAS39	-0.170392	4.16567	0.950207	1	0.888601
	PABPC1L	-2.154	1.60079	0.315569	1	0.224689
	MDGA2	3.20651	2.85983	0.0182798	0.769246	9.23112
	MDGA1	0.461985	3.51555	0.496972	1	1.37744
	SPG21	-4.16764	8.74009	0.00164652	0.11782	0.0556437
	SPG20	0.553792	5.03286	0.342083	1	1.46794
	LOC110082943	-0.158711	4.60894	0.928569	1	0.895825
	RETREG3	0.216569	6.00846	0.664151	1	1.16197
	RTCA	-0.386052	4.5089	0.883614	1	0.765221
	RGSL1	2.52538	1.26662	1	1	5.75726
	RTCB	0.48319	6.24486	0.474684	1	1.39783
	LOC110070959	2.09834	2.65574	0.0631799	1	4.28216
	TXNDC11	-0.319515	4.58019	0.962947	1	0.801339
	TXNDC12	0.736799	5.98302	0.292231	1	1.66647
	LOC110069970	1.0052	1.46835	1	1	2.00722
	LOC110070956	0.58763	1.35122	1	1	1.50278
	TXNDC15	0.317551	4.76672	0.469096	1	1.24621
	LOC110070958	0.843957	3.06603	0.294998	1	1.79497
	TXNDC16	0.235554	2.53934	0.703763	1	1.17736
	UBE2L3	0.211663	7.32466	0.814808	1	1.15802
	TXNDC17	-0.27263	6.19451	0.882566	1	0.827809
	LOC110070962	0.203251	4.47842	0.580618	1	1.15129
	LOC110069973	0.237992	1.53892	1	1	1.17935
	LOC110070965	-3.20008	1.32164	0.544307	1	0.108813
	LOC110069972	-0.681931	3.62294	0.7176	1	0.62333
	LOC110069971	-3.20008	1.32164	0.544307	1	0.108813
	LOC110069978	-2.03161	1.16353	1	1	0.244582
	LOC110069976	0.0402461	4.3677	0.748561	1	1.02829
	LOC110069975	-0.106406	4.36629	0.871148	1	0.928899
	LOC110069979	0.403212	4.43152	0.437597	1	1.32245
	LOC110081609	0.104314	2.03423	1	1	1.07498
	LOC110082937	1.08957	6.19004	0.159756	1	2.1281
	LOC110082930	-0.159681	2.95511	1	1	0.895223
	ENTPD1	3.36542	2.86424	0.00642479	0.374426	10.3061
	ENTPD2	-0.753636	5.92235	0.471856	1	0.593107
	ENTPD3	0.201218	4.7372	0.565994	1	1.14967
	ENTPD4	0.0733846	4.81462	0.701525	1	1.05218
	ENTPD5	0.772286	3.02529	0.34603	1	1.70797
	ENTPD6	0.188561	6.33643	0.734956	1	1.13963
	ENTPD7	0.0137362	4.45456	0.760963	1	1.00957
	ENTPD8	-2.38829	1.69132	0.471281	1	0.191009
	VWA5B1	2.57027	1.28052	1	1	5.9392
	LOC110070946	-1.15527	2.95607	0.406346	1	0.448981
	LOC110069961	-1.06415	3.70317	0.344018	1	0.478255
	LOC110069960	-0.313791	1.78611	1	1	0.804525
	LOC110069967	0.19704	4.62307	0.589472	1	1.14634
	LOC110069966	-0.36742	2.81283	1	1	0.775167
	LOC110069965	0.634642	4.09293	0.287933	1	1.55255
	LOC110069964	0.457938	5.32346	0.424918	1	1.37358
	DXO	-0.0544243	3.2922	0.911253	1	0.962979
	LOC110082929	-2.03161	1.16353	1	1	0.244582
	LOC110069969	-0.140512	1.44338	1	1	0.907197
	LAP3	0.0660702	6.16998	0.82131	1	1.04686
	LOC110069968	-0.140512	1.44338	1	1	0.907197
	LOC110070938	1.06162	1.48826	1	1	2.08727
	LOC110070939	1.362	2.33509	0.242324	1	2.57041
	RTF1	0.426025	7.09556	0.607572	1	1.34353
	MST1R	0.0959213	5.70444	0.750744	1	1.06875
	UBE2J2	0.124057	4.71857	0.648863	1	1.0898
	LOC110070933	-1.93775	1.14366	1	1	0.261023
	OSGEP	0.130366	2.44786	0.841727	1	1.09457
	UBE2J1	-0.0161486	5.12129	0.833552	1	0.988869
	LOC110070935	-0.532023	2.78276	1	1	0.691584
	LOC110070941	0.770805	3.46547	0.256319	1	1.70622
	LOC110069952	0.561627	2.60606	0.586358	1	1.47593
	LOC110070940	-1.41013	1.4228	1	1	0.376277
	LOC110069951	1.78995	1.1671	1	1	3.45803
	LOC110070943	2.11323	3.04824	0.0547035	1	4.32658
	LOC110069950	-3.78677	1.47164	0.31646	1	0.0724551
	LOC110070942	-0.137611	3.65602	0.929576	1	0.909023
	SPATA5L1	0.302695	3.26196	0.645634	1	1.23345
	LARS	0.451839	5.93667	0.476646	1	1.36778
	LOC110069954	0.134715	4.27924	0.641884	1	1.09788
	SWI5	0.90565	3.40739	0.202501	1	1.87339
	LOC110082916	-0.920831	1.34316	1	1	0.528205
	DYM	0.593942	5.62581	0.343472	1	1.50936
	LOC110069959	1.73756	1.15254	1	1	3.33471
	LOC110069958	4.10287	1.69963	0.192303	1	17.1825
	AAR2	0.0100651	5.30318	0.815847	1	1.007
	LOC110070927	-1.0404	2.69519	0.620179	1	0.486194
	LOC110070926	-0.313561	3.4143	1	1	0.804653
	LOC110070923	0.554238	3.02776	0.50442	1	1.46839
	LOC110070925	0.808891	3.33532	0.267195	1	1.75186
	WAPL	0.445319	7.69677	0.635716	1	1.36162
	LOC110069941	-0.618346	1.92843	1	1	0.651417
	LOC110070932	-0.260272	3.34215	1	1	0.83493
	TG	2.11773	2.46655	0.108613	1	4.34012
	LOC110070931	-0.422186	3.22405	0.906245	1	0.746293
	LOC110069945	2.07763	2.20545	0.247589	1	4.22112
	LOC110069944	-1.07567	1.37934	1	1	0.474451
	LOC110069942	0.58557	1.65735	0.682946	1	1.50063
	LOC110069949	0.891997	2.74503	0.334238	1	1.85574
	LOC110069948	0.384538	4.31427	0.42603	1	1.30544
	LOC110069947	4.71478	1.97461	0.0539458	1	26.2597
	LOC110069946	1.5407	2.79162	0.154301	1	2.90936
	RETREG2	0.348292	5.5979	0.525656	1	1.27305
	LOC110082902	2.63368	1.30192	0.544307	1	6.20605
	RETREG1	0.163598	6.54192	0.762552	1	1.12008
	LOC110082903	-2.20581	1.58886	0.315652	1	0.216764
	AARS	0.292387	5.80553	0.582517	1	1.22467
	PCSK2	1.49418	1.55163	0.683525	1	2.81704
	LOC110082900	1.87118	1.66988	0.471466	1	3.65833
	LOC110070919	-0.723937	3.32696	0.663093	1	0.605443
	SLC7A14	-1.93775	1.14366	1	1	0.261023
	PCSK9	1.77813	3.68025	0.0369215	1	3.42981
	LOC110070915	1.73756	1.15254	1	1	3.33471
	SLC7A13	1.73756	1.15254	1	1	3.33471
	AATK	-0.765152	2.07074	1	1	0.588392
	SLC7A11	1.77635	4.5177	0.015718	0.690575	3.42558
	WASL	0.567104	7.24876	0.519832	1	1.48155
	PCSK7	-0.178996	3.49357	0.923367	1	0.883317
	SLC7A10	5.06404	2.15653	0.0262588	0.959879	33.4524
	AATF	0.307511	5.30023	0.529228	1	1.23757
	IER3IP1	0.244816	5.97713	0.645359	1	1.18494
	PCSK6	-0.628752	3.52363	0.772253	1	0.646735
	LOC110070912	-0.454175	2.30583	1	1	0.729928
	PCSK5	0.44233	6.61744	0.551443	1	1.3588
	LOC110070914	-3.39732	1.37605	0.544307	1	0.0949083
	PCSK4	1.78995	1.1671	1	1	3.45803
	CLYBL	-0.140309	3.47505	1	1	0.907325
	LOC110070913	1.80691	2.30142	0.188199	1	3.49893
	LOC110069930	1.13665	3.32731	0.178957	1	2.19869
	MYDGF	-0.434888	5.79908	0.664565	1	0.739751
	IMMP2L	-0.336396	2.94348	1	1	0.792018
	HYAL1	-0.288636	3.56524	1	1	0.818676
	HYAL2	0.180329	6.71519	0.76971	1	1.13314
	HYAL3	0.835092	3.39356	0.231922	1	1.78397
	ENC1	0.0799386	5.87713	0.784445	1	1.05697
	LOC110069935	4.19882	1.7345	0.122354	1	18.3641
	L3HYPDH	-0.0226096	4.84255	0.822083	1	0.98445
	AASS	0.0289773	5.89996	0.82475	1	1.02029
	LOC110069939	-0.636562	1.69187	1	1	0.643244
	WARS	0.213934	5.16633	0.621025	1	1.15985
	TNFRSF12A	1.43826	4.95426	0.044682	1	2.70995
	LOC110070909	-2.86562	1.27369	1	1	0.137203
	MRPS2	0.153368	5.38557	0.662821	1	1.11216
	MRPS7	-0.275607	4.28625	1	1	0.826103
	MRPS6	0.833783	4.68529	0.178366	1	1.78235
	MRPS5	0.204812	5.58725	0.634708	1	1.15254
	LAT2	2.9935	2.13301	0.122824	1	7.96407
	ENAH	0.392481	8.47158	0.712325	1	1.31265
	IMMP1L	-0.374902	3.08404	1	1	0.771158
	LOC110070910	0.599968	5.91854	0.367471	1	1.51568
	MRPS9	0.0441228	5.8151	0.798783	1	1.03106
	LOC110069923	1.73756	1.15254	1	1	3.33471
	ENAM	0.106228	4.59462	0.515117	1	1.07641
	LOC110069920	-0.105512	2.17562	1	1	0.929475
	G2E3	0.245162	5.15484	0.556714	1	1.18523
	LOC110069925	0.465716	1.78064	1	1	1.381
	LOC110069924	-0.229861	1.41764	1	1	0.852717
	LOC110069929	-1.48916	3.85837	0.0464868	1	0.356219
	LOC110069928	0.181984	3.19622	0.723905	1	1.13444
	PNCK	1.04127	2.97196	0.262323	1	2.05804
	IGHMBP2	0.663558	4.2107	0.273974	1	1.58398
	GREB1L	-0.292093	2.94169	1	1	0.816716
	NEDD9	1.24366	5.43674	0.0788987	1	2.36798
	FAAP24	0.770251	3.78285	0.252758	1	1.70557
	CRIP2	0.724822	6.10105	0.312268	1	1.6527
	NEDD8	0.0428458	4.45938	0.7258	1	1.03014
	CRIP1	0.706984	6.01228	0.311861	1	1.63239
	FAAP20	-0.0473584	2.84981	0.878665	1	0.967707
	ARVCF	0.0954822	5.27606	0.710395	1	1.06842
	ALS2CL	-0.251031	4.73274	1	1	0.840296
	FAM172A	0.439637	6.47549	0.539203	1	1.35626
	PLEKHG4B	-1.82038	9.68943	0.153085	1	0.283147
	LOC110069918	-0.881864	3.24155	0.553005	1	0.542666
	LOC110069917	-0.134556	1.64136	1	1	0.91095
	NPDC1	-0.548614	4.23049	0.719769	1	0.683676
	YIPF1	0.538335	4.47153	0.335381	1	1.4523
	YIPF2	0.59144	4.97967	0.301294	1	1.50675
	YIPF3	0.273752	6.45	0.669931	1	1.20895
	YIPF4	0.524463	6.74242	0.507332	1	1.4384
	YIPF5	0.598724	6.69961	0.450852	1	1.51438
	HUWE1	0.679127	8.41376	0.529659	1	1.60117
	CRIPT	0.354688	6.00744	0.549817	1	1.27871
	UBE2G1	0.213875	5.89183	0.666735	1	1.1598
	UBE2G2	0.524266	7.28143	0.551771	1	1.4382
	NEDD1	0.484963	6.20906	0.474691	1	1.39955
	XK	-0.224138	5.532	0.965641	1	0.856106
	GLB1L	1.20441	2.25695	0.321989	1	2.30443
	THEMIS2	-0.48685	2.19947	1	1	0.713581
	NEDD4	0.499598	4.80428	0.368161	1	1.41382
	YIPF6	0.525376	5.57053	0.38628	1	1.43931
	FAM171B	-0.0479474	5.33649	0.879523	1	0.967312
	LOC110069902	-1.93775	1.14366	1	1	0.261023
	LOC110069906	0.871715	4.9177	0.167162	1	1.82984
	SH3GL3	0.580209	2.46241	0.545326	1	1.49507
	RTKN	-0.719264	3.73783	0.401944	1	0.607407
	BCCIP	0.409085	6.73162	0.5831	1	1.32784
	OGDHL	0.769752	2.48564	0.444139	1	1.70498
	FAM174A	0.498311	5.93058	0.433806	1	1.41256
	PAMR1	-2.86562	1.27369	1	1	0.137203
	SH3GL2	1.54503	1.88604	0.328731	1	2.91811
	SH3GL1	0.390721	6.35911	0.56108	1	1.31105
	FAM173B	0.930465	4.19772	0.150678	1	1.90589
	FAM173A	-2.23025	2.77711	0.0927137	1	0.213122
	DKC1	0.174876	6.16002	0.722524	1	1.12887
	UBE2V2	0.695186	6.11606	0.326137	1	1.61909
	RTN2	1.84616	2.04882	0.232609	1	3.59543
	RTN3	0.498882	7.24516	0.563889	1	1.41312
	CHAT	-1.93775	1.14366	1	1	0.261023
	RTN4	0.588428	7.2616	0.504827	1	1.50361
	ENHO	3.81761	1.6052	0.192976	1	14.0998
	EBP	-0.438997	2.91388	0.887538	1	0.737647
	CHAD	-0.744878	4.73893	0.511238	1	0.596718
	ECD	0.236088	5.63211	0.618835	1	1.17779
	CRIM1	0.778371	6.64055	0.334646	1	1.71519
	LAYN	-0.900381	2.79298	0.647608	1	0.535745
	PHOX2B	1.73756	1.15254	1	1	3.33471
	PHOX2A	-1.93775	1.14366	1	1	0.261023
	FAM175B	0.450123	5.81222	0.460522	1	1.36616
	FAM175A	-0.033472	5.59248	0.870016	1	0.977066
	STT3A	0.249415	6.85009	0.718159	1	1.18873
	STT3B	0.485052	8.24383	0.640726	1	1.39964
	CUNH14orf180	0.457321	3.13161	0.464887	1	1.37299
	EDA	0.365585	4.2633	0.483516	1	1.2884
	CHD9	0.545584	8.04888	0.592753	1	1.45961
	CHD8	0.0100449	5.52884	0.829278	1	1.00699
	CHD7	1.37442	5.57561	0.0571582	1	2.59263
	CHD6	0.835177	7.48299	0.38158	1	1.78408
	CHD4	0.564391	7.65867	0.55409	1	1.47876
	CHD3	0.266596	6.90444	0.710419	1	1.20297
	CHD2	0.471938	6.97181	0.559237	1	1.38697
	MEA1	-0.449122	3.95565	0.88558	1	0.732488
	CHD1	0.846343	7.58077	0.381817	1	1.79794
	FAM178B	3.91057	1.62783	0.192811	1	15.0383
	PIDD1	0.389579	3.95829	0.468358	1	1.31001
	UBE2Q1	0.44071	4.87269	0.414763	1	1.35727
	UBE2Q2	0.522585	5.97354	0.416274	1	1.43653
	EED	0.42378	4.63016	0.395239	1	1.34144
	DARS2	0.159687	5.08963	0.665197	1	1.11705
	CUNH14orf159	-0.581998	3.51043	0.772417	1	0.668038
	FAM177B	-3.33159	1.35799	0.544307	1	0.0993324
	UBE2R2	0.380929	5.19589	0.458639	1	1.30218
	CHDH	0.289355	2.99502	0.691203	1	1.22209
	CUNH14orf166	0.118718	5.65137	0.725626	1	1.08577
	PNKP	-0.624451	3.85756	0.704327	1	0.648667
	TGFBRAP1	0.246891	4.64116	0.537936	1	1.18665
	ACVR1B	0.675215	5.79247	0.306579	1	1.59683
	EFS	0.478903	4.95093	0.362343	1	1.39368
	CUNH14orf132	-1.15368	1.67007	0.682879	1	0.449476
	MDH1B	-0.0432436	1.85037	1	1	0.970471
	CHGA	-2.03161	1.16353	1	1	0.244582
	SWT1	0.215892	5.38763	0.608295	1	1.16142
	LRWD1	-0.143176	4.21974	0.904954	1	0.905524
	ACVR2B	-0.413147	3.80192	0.872678	1	0.750983
	ACVR2A	0.417136	7.86374	0.666595	1	1.33527
	CHFR	-0.318748	4.77512	0.93644	1	0.801766
	PNKD	1.87564	2.83041	0.0733969	1	3.66963
	INAFM2	0.0939792	1.53355	1	1	1.06731
	ACIN1	0.0247893	5.39687	0.791895	1	1.01733
	EHF	1.36239	5.27024	0.0554194	1	2.57111
	RPL30	0.666561	9.32955	0.578483	1	1.58729
	RPL32	0.54928	9.51911	0.651891	1	1.46336
	TMEM200B	-0.200117	3.40927	1	1	0.87048
	TMEM200A	-1.85937	2.08521	0.42582	1	0.275597
	RPL31	0.397284	9.98286	0.74721	1	1.31703
	RPL34	0.733888	9.59197	0.546334	1	1.66312
	TMEM200C	1.41646	2.32411	0.242887	1	2.66929
	ENO1	0.86235	8.60592	0.441303	1	1.818
	ABCA12	1.8452	2.87392	0.058481	1	3.59303
	ENO2	-0.539637	2.91678	0.887508	1	0.687944
	ENO3	-2.03161	1.16353	1	1	0.244582
	ENO4	1.42059	2.36238	0.18518	1	2.67694
	GPR173	3.13269	1.40651	0.544307	1	8.7707
	GPR176	2.32035	1.87672	0.328815	1	4.99454
	RNF115	0.240352	4.46716	0.541272	1	1.18128
	RNF114	0.251604	4.88476	0.534471	1	1.19053
	CUNH12orf65	0.138501	3.47518	0.692824	1	1.10076
	CUNH12orf66	0.329529	3.49694	0.551686	1	1.2566
	GPR171	1.09153	2.74107	0.232924	1	2.13099
	RPL36	0.0486241	8.69973	0.955751	1	1.03428
	ADNP2	0.685661	5.45428	0.270862	1	1.60844
	RPL35	0.620837	7.88149	0.540457	1	1.53777
	RTTN	1.77438	4.90214	0.0177652	0.751323	3.42091
	RPL38	0.281558	9.42683	0.812562	1	1.21551
	RPL37	0.357274	9.76283	0.770144	1	1.281
	ANKS1A	0.630241	6.40664	0.398951	1	1.54782
	RPL39	0.594474	9.36646	0.619046	1	1.50992
	RNF111	0.175621	3.78926	0.629722	1	1.12945
	ANKS1B	-2.71098	2.12019	0.167532	1	0.152727
	CHGB	0.520737	1.58105	0.753861	1	1.43469
	MED1	0.438621	6.28685	0.519863	1	1.35531
	MECR	0.73648	3.98362	0.256605	1	1.66611
	RPL21	0.340812	10.2157	0.784245	1	1.26647
	RPL23	-0.155918	9.6683	0.905408	1	0.897561
	RPL22	0.115206	9.27947	0.916518	1	1.08313
	MED8	0.764337	3.83402	0.22772	1	1.69859
	MED9	0.397698	2.87149	0.554815	1	1.3174
	LOC110080192	2.48092	1.25269	1	1	5.58253
	AARSD1	-0.688135	4.70342	0.581769	1	0.620656
	MED4	0.39592	5.18217	0.451212	1	1.31578
	DKK1	4.90967	2.07229	0.03723	1	30.0578
	MED6	0.55328	4.57458	0.321931	1	1.46742
	DKK2	-0.929627	5.50504	0.36009	1	0.524994
	MED7	0.411147	5.54908	0.465639	1	1.32974
	CPED1	0.469847	7.03805	0.568463	1	1.38496
	RNF123	0.31775	5.19325	0.509688	1	1.24639
	CUNH12orf50	-0.871422	1.5551	1	1	0.546608
	GPR162	-0.579883	1.67647	1	1	0.669018
	RNF126	0.432768	3.51699	0.496937	1	1.34982
	RNF125	-0.223205	3.93035	1	1	0.85666
	RNF128	0.617649	4.82109	0.275599	1	1.53437
	GPR161	-0.20442	4.60416	1	1	0.867887
	GPR160	0.931758	5.62653	0.173442	1	1.9076
	CUNH12orf57	-0.365725	3.34531	1	1	0.776079
	RPL24	0.694345	10.0353	0.577469	1	1.61815
	RPL27	0.42144	9.45501	0.723652	1	1.33926
	RPL28	0.181647	10.5388	0.885091	1	1.13418
	GPLD1	0.378295	2.64564	0.730846	1	1.2998
	RNF122	-0.294047	1.2632	1	1	0.815611
	RNF121	1.39945	3.98029	0.0623844	1	2.63801
	VPS26A	0.58118	7.5035	0.530253	1	1.49607
	LOC110080180	-0.144748	4.70289	0.933467	1	0.904537
	VPS26B	0.0983049	2.76353	0.751387	1	1.07051
	LOC110080185	0.52713	10.6187	0.67871	1	1.44106
	OCSTAMP	-4.34503	1.64565	0.192682	1	0.0492057
	LOC110079191	-0.973219	1.32975	1	1	0.509368
	LOC110079190	2.48092	1.25269	1	1	5.58253
	PNPO	0.364295	4.06821	0.462104	1	1.28725
	LOC110080176	2.24747	1.85235	0.329037	1	4.7485
	CHKB	0.473654	2.36094	0.671839	1	1.38862
	CHKA	0.208798	4.22016	0.583969	1	1.15573
	PNO1	0.339019	5.12454	0.486849	1	1.2649
	PRRC2C	0.691125	8.08669	0.503786	1	1.61454
	LOC110080170	0.378298	6.40863	0.578779	1	1.29981
	SLC16A10	-0.307849	3.34149	1	1	0.807845
	LOC110080175	-1.41013	1.4228	1	1	0.376277
	LOC110080174	-0.985693	6.42573	0.272176	1	0.504983
	GPR137B	0.377846	4.61761	0.41546	1	1.2994
	PRRC2B	0.59211	6.72471	0.455534	1	1.50745
	RPL3L	-0.581097	3.69594	0.799038	1	0.668455
	SLC16A14	-0.147802	1.25819	1	1	0.902625
	GPR137C	0.649863	2.67396	0.486272	1	1.56902
	PRRC2A	0.533122	7.11745	0.558434	1	1.44706
	LOC110080172	-0.132627	4.00432	0.889304	1	0.912169
	CPEB1	-1.3323	4.04311	0.181283	1	0.397136
	CUNH12orf73	-0.181202	4.45044	1	1	0.881968
	GPR180	0.279327	4.85806	0.526056	1	1.21363
	GPR183	0.856433	3.09072	0.293925	1	1.81056
	GPR182	-0.989289	1.58769	1	1	0.503726
	LOC110079183	-0.20019	1.24423	1	1	0.870436
	CPEB3	0.456931	5.27128	0.402935	1	1.37262
	CPEB4	0.14398	5.55489	0.687404	1	1.10495
	LOC110081497	-0.935033	1.96897	0.751308	1	0.523031
	ELL	-0.159877	4.47782	0.921298	1	0.895101
	MEI1	0.0383555	1.81109	1	1	1.02694
	ELN	-0.614602	6.13632	0.575481	1	0.65311
	MEI4	-2.86562	1.27369	1	1	0.137203
	LOC110080160	1.73756	1.15254	1	1	3.33471
	VSIG10L	-1.27807	1.83075	0.470139	1	0.412347
	LOC110081493	0.135772	2.20634	1	1	1.09868
	ZCWPW2	-3.73021	1.45438	0.31646	1	0.0753522
	RNF157	0.191965	5.92952	0.67658	1	1.14232
	ZCWPW1	-0.885234	1.35352	1	1	0.5414
	GPR132	1.73756	1.15254	1	1	3.33471
	CHL1	2.49114	4.62535	0.00203132	0.139471	5.62221
	ZAR1L	-2.34486	2.29929	0.188313	1	0.196847
	ENSA	0.625791	7.40705	0.495892	1	1.54306
	GPR137	2.28017	1.81178	0.329414	1	4.85735
	EMB	2.09195	3.74343	0.0160615	0.699639	4.26325
	RNF150	0.0660086	3.68109	0.728676	1	1.04682
	RNF152	0.655289	5.98668	0.337658	1	1.57493
	EMD	0.111155	5.88605	0.748861	1	1.08009
	GPR135	-1.53304	2.73212	0.23339	1	0.345548
	LOC110079168	0.130863	2.06081	1	1	1.09495
	ZC3H10	0.553743	4.87547	0.318905	1	1.46789
	LOC110080154	1.47014	1.59261	0.683295	1	2.77049
	LOC110080158	-4.04371	1.54474	0.315965	1	0.0606348
	EN1	1.78995	1.1671	1	1	3.45803
	LOC110080153	1.78995	1.1671	1	1	3.45803
	LOC110080151	-2.78782	1.25476	1	1	0.144805
	RNF168	0.485109	6.38492	0.499615	1	1.39969
	RNF167	0.726517	4.23099	0.222315	1	1.65464
	AFTPH	0.757248	6.65068	0.389021	1	1.69026
	RNF169	-0.687754	5.25243	0.551643	1	0.62082
	RNF166	0.462087	4.82716	0.378292	1	1.37753
	CCDC90B	0.481022	2.81062	0.521515	1	1.39573
	ENG	0.0166281	4.5052	0.732286	1	1.01159
	PCYOX1	0.0848523	5.68143	0.897941	1	1.06058
	RNF165	-2.03161	1.16353	1	1	0.244582
	LOC110079156	1.78995	1.1671	1	1	3.45803
	RPL10	0.3766	9.93782	0.7586	1	1.29828
	LOC110080149	-0.346662	4.32902	0.955704	1	0.786402
	RPL12	0.293401	9.54134	0.804582	1	1.22553
	RPL11	0.00406381	9.45772	0.997136	1	1.00282
	LOC110081472	-1.05264	2.00854	1	1	0.482087
	RNF135	0.700703	3.42387	0.291933	1	1.6253
	GPR153	-0.90502	3.41942	0.532282	1	0.534025
	RNF139	0.497616	5.3368	0.384327	1	1.41188
	RNF138	0.00306281	5.31217	0.816004	1	1.00213
	CHN2	0.545352	6.48391	0.466322	1	1.45938
	GPR150	-0.752606	1.88581	1	1	0.593531
	CHN1	0.618371	3.82251	0.298817	1	1.53514
[truncated: 14,960 more rows]

## Sheet: Acrodont vs Pleurodont_Mesenchy
Expression	Gene names	logFC	logCPM	P-values	FDR	FC
UP	ADAM22	1.88776	5.59974	0.000216601	0.0154877	3.70059
UP	C1S	2.87817	8.10446	3.7183e-06	0.000638909	7.35215
UP	C1R	2.58544	6.19099	3.69351e-07	0.000109243	6.00199
UP	FAM196B	2.56508	3.72575	0.000105969	0.00871804	5.91787
UP	PLEK	4.00113	3.05924	2.28401e-05	0.00265859	16.0126
UP	PODNL1	2.58732	4.10365	4.46192e-05	0.00447233	6.00979
UP	LOC110081669	2.56358	5.65343	9.87965e-10	8.10221e-07	5.91171
UP	IL1R2	2.60146	3.35389	0.000535006	0.0304498	6.06902
UP	SLC35D3	4.11747	2.93827	0.000605314	0.0331947	17.3573
UP	C2	2.6313	5.18312	0.000378394	0.023471	6.19585
UP	CP	2.91051	9.53482	2.3833e-06	0.000434338	7.51884
UP	SOCS3	1.70695	5.7281	1.9938e-05	0.00241424	3.2647
UP	SLITRK6	1.52105	5.5617	0.000273169	0.0185931	2.87
UP	LOC110082831	2.5123	8.37716	0.000337474	0.0215148	5.7053
UP	SLC7A11	3.72017	2.84304	0.000609498	0.0333229	13.179
UP	TNFRSF12A	2.34162	4.57439	0.000170272	0.0127471	5.06871
UP	RTTN	2.32104	5.47174	7.43161e-07	0.000186224	4.99691
UP	EMB	1.82379	4.84913	9.15765e-05	0.00790537	3.54009
UP	ADRA2A	1.83721	7.17228	1.20727e-08	6.22332e-06	3.5732
UP	LOC110082805	1.51241	5.30079	0.000343337	0.0218115	2.85286
UP	POMC	8.39332	4.19365	2.05528e-12	7.41626e-09	336.233
UP	LOC110077283	3.34088	6.46268	2.85536e-06	0.000515164	10.1322
UP	FYB	2.27514	4.42845	4.02433e-05	0.00417282	4.84043
UP	SPOCK3	2.28435	8.99114	2.01371e-06	0.000378452	4.87144
UP	TIMP1	3.11549	7.74054	4.63919e-06	0.000760911	8.66677
UP	LOC110078480	4.33762	3.43339	1.05808e-06	0.00024792	20.2187
UP	LOC110091423	7.14153	3.0445	9.87278e-05	0.00828487	141.194
UP	LOC110078536	6.07213	2.26658	0.000501793	0.0291104	67.2813
UP	HCK	1.825	4.48646	0.000821053	0.0414942	3.54306
UP	LOC110091490	2.41342	6.99099	1.76327e-05	0.00216414	5.32737
UP	LOC110089075	2.10801	7.16671	1.72918e-05	0.00213684	4.31096
UP	LOC110089074	3.51541	5.90972	0.000184425	0.0133631	11.4352
UP	LOC110079691	4.58719	2.64434	0.000292177	0.0194518	24.0371
UP	LOC110080716	2.70413	5.39112	7.73168e-07	0.000191089	6.51664
UP	LOC110090061	2.7479	3.25283	0.000794703	0.0406451	6.7174
UP	SNED1	1.92282	6.10097	2.19136e-06	0.000403434	3.79164
UP	SERPINE2	1.54911	8.87441	8.02507e-05	0.00723941	2.92637
UP	BIN2	3.48374	3.25083	2.76427e-05	0.00313666	11.1869
UP	SERPING1	1.82855	7.88865	2.20217e-05	0.00259683	3.5518
UP	ACOD1	2.9947	3.87365	0.000459251	0.0269896	7.97065
UP	CSF2RB	2.27493	5.07497	2.07717e-05	0.00249842	4.83973
UP	LOC110070257	2.9764	5.5192	0.00097652	0.047876	7.8702
UP	ETS2	1.24774	6.90572	0.000210798	0.0151522	2.37469
UP	CNR1	1.88291	4.82401	5.67476e-05	0.00541714	3.68819
UP	LOC110083472	2.6739	3.19781	0.00087867	0.044036	6.38151
UP	LOC110082123	2.19499	5.03851	6.02254e-05	0.00568893	4.57886
UP	APCDD1	1.67547	7.03447	0.0004067	0.0244844	3.19424
UP	OTOP1	2.3216	3.81338	7.97326e-05	0.00722882	4.99888
UP	COMP	2.1626	7.15014	8.46455e-07	0.00020299	4.4772
UP	LOC110071361	3.19931	4.81482	0.000305933	0.0202185	9.18519
UP	LOC110084638	6.40072	2.51224	0.000183565	0.01336	84.4905
UP	CCER2	5.48176	3.36896	0.000157596	0.0119029	44.6864
UP	NPR3	1.44321	9.11012	9.55526e-05	0.00809371	2.71925
UP	BMP7	1.93779	5.50575	1.96988e-07	6.20035e-05	3.83119
UP	LAMC3	2.07113	4.81091	0.000406344	0.0244844	4.20215
UP	LOC110070063	3.73327	4.19514	8.13417e-10	6.98842e-07	13.2992
UP	MYB	1.99471	4.32114	0.000635862	0.0344511	3.98536
UP	CEMIP	3.39261	7.75528	1.75522e-08	8.79656e-06	10.5021
UP	DOCK2	1.65061	5.31352	1.32014e-05	0.00166559	3.13966
UP	DLGAP1	4.88416	2.87274	0.000128831	0.0100188	29.5309
UP	CENPH	2.21569	4.04222	0.000217181	0.0154877	4.64503
UP	LOC110083921	2.1826	4.05397	0.000568177	0.031639	4.53972
UP	ALX4	2.5132	4.27281	4.82233e-06	0.000761605	5.70885
UP	ALX1	6.31417	6.97646	2.47896e-32	4.47255e-28	79.5708
UP	LOC110083896	2.54806	3.62562	0.000351726	0.0222661	5.84849
UP	CLCF1	3.09551	3.88849	1.09608e-05	0.00142269	8.54753
UP	TRPC3	2.22847	5.72318	3.60493e-07	0.0001084	4.68635
UP	RIPOR2	1.7702	5.00949	0.000701116	0.0374247	3.41102
UP	WNT11	1.95635	6.50553	1.21913e-06	0.000261046	3.88078
UP	LOC110081122	2.38917	7.12203	5.35575e-05	0.0051673	5.23855
UP	PTPRC	2.10345	5.60534	0.000109543	0.00890256	4.29734
UP	PTPRT	1.39966	6.39004	0.000622798	0.033845	2.6384
UP	PTPRO	2.75932	3.67485	0.000105465	0.00871804	6.77076
UP	LOC110083680	3.48528	8.66918	0.000134109	0.0103846	11.1988
UP	LOC110083676	9.11252	4.8703	6.02914e-06	0.000856517	553.532
UP	AOAH	3.61325	2.98905	0.000181912	0.0133417	12.2377
UP	LOC110084977	2.18873	3.52402	0.000759348	0.0395578	4.55905
UP	VSIG4	2.32796	3.63243	0.000565689	0.031598	5.02094
UP	LRRIQ1	3.73208	4.65145	1.03391e-09	8.11034e-07	13.2882
UP	LOC110074639	3.55489	3.22863	8.98103e-05	0.00779018	11.7524
UP	SLA	2.27818	4.48583	2.94846e-05	0.00326357	4.85065
UP	SP5	2.35078	3.64349	0.000269948	0.0185575	5.10099
UP	TACC3	1.8985	4.50976	0.000312988	0.0205343	3.72826
UP	LOC110073366	2.10056	3.91311	0.000951009	0.0470085	4.28876
UP	LOC110087983	3.44402	3.63787	2.94363e-05	0.00326357	10.8832
UP	TNIP3	6.9217	4.51964	3.10282e-10	3.49882e-07	121.239
UP	SELE	3.41285	5.96413	5.05886e-06	0.000761605	10.6505
UP	LOC110075898	2.62871	4.89431	0.000229692	0.0162514	6.18474
UP	LOC110086517	3.07935	4.03202	1.94195e-05	0.00236734	8.45233
UP	LOC110086516	3.91615	3.06575	0.000120641	0.00958859	15.0966
UP	STAT6	1.26926	5.75009	0.000859351	0.0433084	2.41038
UP	MOXD1	2.45051	4.41266	6.82e-05	0.00631007	5.46608
UP	LOC110086457	1.8554	4.76397	3.02351e-05	0.00332623	3.61851
UP	LOC110086420	2.71002	4.57552	9.30707e-05	0.0079582	6.54331
UP	LOC110086417	6.27905	2.44871	0.00043644	0.0259022	77.6573
UP	WAS	2.97005	2.97839	0.000538118	0.0305306	7.83563
UP	CORIN	2.05794	5.30818	1.22985e-06	0.000261046	4.16392
UP	LOC110075668	2.74118	6.39065	6.16723e-05	0.00579527	6.68615
UP	TMEM100	1.31599	7.06877	0.00012449	0.0097654	2.48973
UP	LOC110088946	2.33569	5.00768	0.000122423	0.00964521	5.04794
UP	LOC110084427	2.06033	4.63798	0.000433611	0.0258192	4.17082
UP	FBN3	1.72588	6.65615	1.57363e-06	0.000323333	3.30782
UP	LOC110085696	2.28572	6.68425	1.04593e-05	0.00136744	4.87607
UP	LOC110071038	2.02216	5.9465	3.50813e-06	0.000608593	4.06192
UP	LOC110074887	8.03555	3.87601	5.87621e-10	5.57992e-07	262.386
UP	LOC110074870	5.09892	4.37187	2.26173e-05	0.00264975	34.2711
UP	LOC110074853	4.57984	5.16097	0.000806448	0.0409857	23.9149
UP	ATP4A	5.18295	5.33152	1.99324e-07	6.20035e-05	36.3264
UP	MASP2	3.23198	4.46328	0.000102616	0.00857125	9.39555
UP	STEAP4	4.47052	7.94956	2.95708e-07	9.04264e-05	22.1697
UP	ARHGAP30	3.45203	3.61909	4.66186e-05	0.00464692	10.9437
UP	SNX10	1.98795	4.63973	0.000751738	0.0393126	3.96672
UP	LOC110088385	2.02504	5.57126	5.7765e-06	0.000840481	4.07003
UP	LOC110088379	2.28537	5.29705	0.000355618	0.0224338	4.87489
UP	TNFRSF6B	3.89602	6.69635	5.95984e-05	0.00565934	14.8874
UP	LOC110088484	2.67549	5.51948	9.05007e-06	0.0012006	6.38854
UP	LOC110088485	2.9417	7.06689	5.8508e-06	0.00084448	7.68317
UP	LOC110088456	2.52863	5.7043	3.27165e-06	0.000573079	5.77023
UP	LOC110089773	3.18788	9.12762	1.78967e-07	5.97948e-05	9.11271
UP	TNFAIP3	1.72092	4.92406	0.000324837	0.0208566	3.29645
UP	NUP210	1.87701	4.50917	0.000151069	0.0115186	3.67312
UP	PLAC8	2.60763	3.29759	0.000317766	0.0206764	6.09503
UP	FGF7	1.35381	6.6901	0.00022321	0.015855	2.55586
UP	PLAUR	3.36756	3.85008	0.000614386	0.0334887	10.3214
UP	SLC5A5	5.49273	3.33493	5.5054e-07	0.000149915	45.0274
UP	LOC110089468	2.64668	4.65714	0.0005795	0.0321703	6.26226
UP	IRF5	3.70774	2.57175	0.000898699	0.044915	13.0659
UP	PLCB2	1.74222	4.30689	0.000795239	0.0406451	3.34549
UP	CUNH11orf49	3.62283	2.87447	0.000329635	0.0210896	12.3191
UP	CSF1R	1.54581	6.61032	8.95724e-05	0.00779018	2.91967
UP	CARMIL2	3.92745	3.72414	1.94956e-07	6.20035e-05	15.2153
UP	SASH3	4.99426	2.97011	5.62428e-05	0.00539751	31.8729
UP	SPI1	2.31627	4.55407	1.79042e-06	0.00035892	4.98042
UP	ITGB2	1.54654	6.41161	4.98428e-06	0.000761605	2.92116
UP	ITGA4	1.89971	6.38258	4.71774e-06	0.000761605	3.73138
UP	LOC110087581	2.6863	3.58118	0.00038309	0.0236703	6.43663
UP	LOC110086201	8.93433	4.70442	5.67173e-06	0.000838766	489.218
UP	CUNH3orf67	2.9171	4.37789	4.88269e-06	0.000761605	7.55327
UP	NCKAP1L	1.64848	4.65835	0.000321434	0.020786	3.13504
UP	NCF1	1.81319	5.52857	4.88927e-06	0.000761605	3.51418
UP	PIM2	2.50744	5.16128	8.46453e-05	0.00748613	5.68608
UP	RASGRP4	3.8923	3.36446	4.9707e-06	0.000761605	14.8491
UP	A4GALT	1.24587	7.17895	4.40153e-05	0.00443645	2.37162
UP	ENPEP	3.5654	5.95526	3.69148e-09	2.29661e-06	11.8384
UP	RPH3A	6.00294	2.24155	0.000745812	0.0391161	64.1305
UP	LOC110075272	3.01062	7.86525	1.36717e-06	0.000286821	8.0591
UP	STC1	5.53734	4.98107	3.35718e-09	2.16322e-06	46.4415
UP	STC2	2.7171	5.22995	6.31126e-09	3.42285e-06	6.57551
UP	ABCC4	2.11435	4.86973	0.000136871	0.0105531	4.32996
DOWN	LOC110081778	-8.01643	3.72437	2.30477e-08	1.12385e-05	0.00386203
DOWN	LOC110080407	-4.53877	3.17413	4.95336e-06	0.000761605	0.0430225
DOWN	LIMCH1	-1.52244	5.92227	3.6795e-05	0.00385963	0.348097
DOWN	KCNN4	-4.04827	5.82361	6.1203e-08	2.34941e-05	0.0604434
DOWN	HTRA3	-1.26869	6.68921	0.000968818	0.0476278	0.415038
DOWN	CA4	-8.669	4.31938	4.26852e-09	2.56709e-06	0.0024568
DOWN	SHANK2	-4.49481	5.7651	1.78003e-10	2.14103e-07	0.0443534
DOWN	CFD	-2.82771	4.96837	5.2528e-07	0.000145802	0.140856
DOWN	CFI	-2.09904	5.51839	0.000686076	0.0368398	0.233414
DOWN	CGN	-2.35493	5.55055	3.5779e-05	0.003775	0.195477
DOWN	PLP1	-2.36079	5.61558	3.26917e-08	1.55217e-05	0.194685
DOWN	LOC110078054	-4.56022	4.21358	1.19728e-06	0.000261046	0.0423875
DOWN	CNP	-1.1917	7.83092	0.000183643	0.01336	0.437788
DOWN	CFTR	-4.13339	5.5165	6.21342e-07	0.000162467	0.0569806
DOWN	LOC110081707	-2.6949	6.03668	4.18515e-07	0.000119855	0.154438
DOWN	TRNAK-UUU	-7.76008	3.3881	0.000254971	0.0176253	0.00461301
DOWN	DGCR2	-1.37824	6.79073	0.000106306	0.00871804	0.384688
DOWN	LOC110070851	-4.80119	4.7589	5.5672e-07	0.000149915	0.0358673
DOWN	AATK	-2.66521	6.18405	4.29972e-08	1.93939e-05	0.157649
DOWN	EHF	-1.9097	6.12115	0.000401359	0.0244844	0.266148
DOWN	CHKA	-2.15614	6.08844	8.30628e-06	0.00111837	0.224356
DOWN	MSRB1	-2.4277	5.12585	0.000189553	0.0136797	0.185861
DOWN	CHRD	-3.1097	4.24037	4.78372e-05	0.00471628	0.115848
DOWN	B3GNT3	-6.2802	2.36451	0.000178783	0.0131676	0.0128668
DOWN	MEIS1	-1.81672	5.95326	0.000151309	0.0115186	0.283866
DOWN	SYBU	-1.65232	4.86026	0.000402706	0.0244844	0.318129
DOWN	DLX2	-2.91705	4.45927	5.76989e-08	2.31334e-05	0.132398
DOWN	LOC110089239	-2.96799	5.23845	7.37404e-07	0.000186224	0.127804
DOWN	NTRK3	-4.44906	3.53644	9.40652e-08	3.3277e-05	0.0457826
DOWN	LOC110089326	-3.89233	5.68802	1.19059e-06	0.000261046	0.0673428
DOWN	LOC110090243	-2.20413	5.36645	0.000178808	0.0131676	0.217015
DOWN	GAL	-7.50779	3.33907	4.99687e-08	2.14651e-05	0.0054945
DOWN	LOC110079958	-1.86331	5.70579	4.73378e-05	0.00469268	0.274844
DOWN	SYT1	-5.17707	3.62427	1.68925e-07	5.75048e-05	0.0276405
DOWN	GIF	-4.14066	7.53633	7.696e-08	2.89273e-05	0.056694
DOWN	EPS8	-1.73497	5.14355	0.000247503	0.0172411	0.300414
DOWN	RAB3D	-1.82927	5.3967	0.000417039	0.0249146	0.281407
DOWN	BRSK2	-3.07776	2.99639	0.000293634	0.019477	0.118441
DOWN	GFRA3	-1.46328	7.40231	0.000115749	0.00928156	0.362667
DOWN	LOC110091488	-4.92253	3.81164	8.34518e-05	0.00743376	0.0329739
DOWN	GABRP	-5.40479	3.11034	0.000274125	0.0185931	0.0236046
DOWN	SCUBE1	-1.504	6.58433	0.000112633	0.00907195	0.352573
DOWN	HPX	-7.49976	7.40067	3.40784e-12	1.02474e-08	0.0055252
DOWN	LOC110089076	-3.84151	3.98652	5.73658e-06	0.000840481	0.0697573
DOWN	LEPR	-1.48993	6.76561	1.46888e-05	0.00182769	0.356029
DOWN	KANK4	-2.06754	5.11795	3.38645e-05	0.00361074	0.238567
DOWN	SLC25A5	-1.40202	7.79254	0.000776091	0.0400064	0.3784
DOWN	SLC12A2	-4.14525	10.4634	7.55651e-12	1.94764e-08	0.0565138
DOWN	TM4SF4	-4.47274	3.77118	1.29528e-05	0.00165741	0.045037
DOWN	TSPAN1	-3.38678	5.52874	2.62943e-05	0.00300254	0.0956042
DOWN	PPP1R1B	-4.11026	6.31718	7.85214e-10	6.98842e-07	0.0579013
DOWN	ID4	-1.99121	5.19405	0.000171429	0.0127806	0.251527
DOWN	KIF19	-2.23404	4.19897	0.000284329	0.0190701	0.212562
DOWN	KIF5A	-5.86659	2.08848	0.000666271	0.0358832	0.0171388
DOWN	ANOS1	-1.29947	6.3648	0.000308334	0.0203028	0.406275
DOWN	SEMA5A	-1.21976	6.57556	0.000720629	0.0381278	0.429355
DOWN	CHRM3	-2.86681	6.25381	1.78988e-11	3.58812e-08	0.137089
DOWN	BOLA1	-2.54537	3.29718	0.000438687	0.0259501	0.171304
DOWN	MYH11	-1.66383	6.98305	6.47314e-06	0.000905336	0.3156
DOWN	ERBB3	-1.66913	5.62472	4.86865e-05	0.00474812	0.314443
DOWN	LOC110084866	-4.71987	3.16994	0.000466078	0.0273019	0.037947
DOWN	LOC110084805	-1.68582	6.40174	4.29063e-05	0.00435521	0.310827
DOWN	CELSR2	-1.42101	6.58912	2.92458e-05	0.00326357	0.373451
DOWN	ETV1	-1.84148	8.03957	6.97853e-06	0.000961119	0.279035
DOWN	LOC110071427	-4.51535	6.58465	6.55627e-07	0.000168983	0.0437266
DOWN	PARM1	-2.50355	4.70979	0.000118284	0.00944285	0.176342
DOWN	LOC110072721	-7.25259	2.93832	0.000804911	0.0409857	0.00655771
DOWN	COBL	-2.80757	4.33859	4.00189e-05	0.00417282	0.142836
DOWN	DRP2	-2.25006	5.78343	2.92974e-06	0.00052335	0.210215
DOWN	ATP1B1	-2.43392	8.23336	1.09128e-06	0.000251646	0.185062
DOWN	NOS1	-2.7334	4.46809	3.14193e-05	0.00341486	0.150371
DOWN	COL6A6	-2.799	3.1545	0.000719905	0.0381278	0.143687
DOWN	FAM120C	-1.36554	6.66135	9.29779e-05	0.0079582	0.388089
DOWN	LOC110070020	-2.09222	7.77633	2.12631e-06	0.000395494	0.234519
DOWN	PPARGC1A	-3.30756	4.98482	1.18749e-06	0.000261046	0.101001
DOWN	PPARGC1B	-2.61383	5.33338	4.02738e-06	0.000672797	0.163365
DOWN	MAG	-2.1254	4.29832	0.000735497	0.0386876	0.229188
DOWN	MBP	-2.30031	9.35235	3.42559e-10	3.63556e-07	0.20302
DOWN	FOXI1	-6.80898	2.6599	0.000106824	0.00872092	0.0089185
DOWN	FOXE1	-2.37745	4.77754	9.46398e-05	0.00805421	0.192449
DOWN	MPZ	-2.13063	8.95081	4.51449e-07	0.000127266	0.228358
DOWN	ZFHX4	-1.31991	8.33815	0.000121465	0.00961173	0.400559
DOWN	EPS8L2	-1.39318	7.3451	7.15514e-05	0.00658638	0.380725
DOWN	ATP2B2	-4.4996	4.89174	6.14248e-11	8.52481e-08	0.0442064
DOWN	FZD5	-1.53719	5.44563	0.000967396	0.0476278	0.344555
DOWN	FHDC1	-1.91991	5.86464	8.19841e-05	0.00735899	0.264271
DOWN	LOC110071222	-4.05446	5.16832	1.53779e-09	1.02758e-06	0.0601846
DOWN	LOC110071205	-6.84562	2.69079	7.91068e-05	0.00720831	0.00869486
DOWN	KCNIP4	-4.41975	2.97694	0.000110326	0.00892603	0.0467223
DOWN	AIF1L	-1.28718	6.86146	0.000157676	0.0119029	0.409751
DOWN	TC2N	-1.89945	5.21846	7.9945e-06	0.0010927	0.268045
DOWN	LOC110083973	-1.56971	6.07102	0.000243919	0.0171906	0.336876
DOWN	SNAP25	-7.16269	2.94601	3.09293e-05	0.00338197	0.00697937
DOWN	LOC110082603	-4.06341	3.05507	0.000904159	0.0450631	0.0598126
DOWN	LOC110070614	-4.73455	4.69374	4.94244e-05	0.00479416	0.0375627
DOWN	LOC110070612	-5.18775	9.93009	1.97747e-06	0.000375641	0.0274367
DOWN	ADGRA1	-1.45628	5.76895	0.000142767	0.0109609	0.364433
DOWN	OMG	-2.50724	3.11726	0.000875604	0.0440046	0.175892
DOWN	PRR15L	-5.219	3.64538	8.17772e-06	0.00110934	0.0268488
DOWN	ACTA2	-1.3029	6.3176	0.000727569	0.0383824	0.40531
DOWN	ACTA1	-2.61039	6.59169	0.000786847	0.0404453	0.163755
DOWN	LOC110081292	-5.60797	3.30167	1.31865e-05	0.00166559	0.0205038
DOWN	COL2A1	-2.09859	4.67995	0.000587366	0.0325069	0.233486
DOWN	AMBN	-4.44656	3.66024	0.000393008	0.0241552	0.045862
DOWN	LOC110070515	-3.68844	4.42633	0.000271543	0.0185575	0.0775654
DOWN	LOC110071835	-4.1879	3.73361	0.00031528	0.0206097	0.0548678
DOWN	LOC110070513	-3.03147	3.59105	0.000378565	0.023471	0.122303
DOWN	CLDN11	-2.0368	6.21782	6.16829e-09	3.42285e-06	0.243704
DOWN	CLDN15	-3.91008	3.30708	0.000247039	0.0172411	0.0665192
DOWN	CLDN19	-2.32736	3.5987	0.000600864	0.0330512	0.199249
DOWN	AMTN	-3.47863	4.30093	0.000127712	0.00997483	0.0897072
DOWN	VAT1L	-1.94396	4.32709	0.000594523	0.0328024	0.259903
DOWN	CLDN7	-2.33069	6.53935	3.4022e-05	0.00361074	0.198789
DOWN	UGT8	-2.41595	5.5255	1.97793e-06	0.000375641	0.187382
DOWN	CADM2	-1.81966	4.32073	0.000772059	0.0399126	0.283288
DOWN	KCNMA1	-2.55876	5.63464	6.24118e-06	0.000879713	0.169721
DOWN	COL11A1	-2.48415	7.38233	2.19619e-11	3.96237e-08	0.17873
DOWN	LOC110083760	-4.66824	8.57368	1.14613e-09	8.61605e-07	0.0393297
DOWN	WNK2	-1.73638	6.2004	2.11731e-05	0.00251427	0.300122
DOWN	WNK3	-3.79395	7.76399	1.28626e-10	1.65762e-07	0.0720952
DOWN	ANO1	-3.08595	7.0873	1.07975e-07	3.74633e-05	0.117771
DOWN	LOC110083683	-4.84631	6.35966	4.15275e-08	1.92113e-05	0.0347628
DOWN	MYOM2	-3.76965	3.88274	0.000407123	0.0244844	0.0733198
DOWN	MRC1	-1.41145	7.73736	0.000104314	0.00867294	0.375935
DOWN	LOC110070360	-5.06748	2.78529	0.000375321	0.0234309	0.029822
DOWN	MREG	-1.80593	4.70114	9.81225e-05	0.00827255	0.285996
DOWN	SCG2	-3.57429	4.6776	4.09792e-06	0.0006783	0.0839519
DOWN	BHLHA15	-4.61545	5.6131	5.58286e-08	2.29051e-05	0.0407953
DOWN	MSLN	-5.83502	9.22572	8.01505e-08	2.95117e-05	0.017518
DOWN	VMO1	-4.71735	7.91796	8.52285e-05	0.00750094	0.0380135
DOWN	LOC110084054	-1.53577	4.69331	0.000938195	0.0465025	0.344894
DOWN	TGM2	-1.18999	6.79841	0.000245231	0.0172158	0.438305
DOWN	LOC110085322	-7.24052	7.44813	4.28899e-05	0.00435521	0.00661279
DOWN	PRKD1	-1.41069	5.71824	0.000498599	0.0290185	0.376133
DOWN	GAS1	-1.54067	4.93936	0.000808902	0.040995	0.343727
DOWN	CUNH4orf19	-2.63164	3.75235	0.000772023	0.0399126	0.161361
DOWN	ABLIM1	-1.21297	6.932	4.29679e-05	0.00435521	0.431379
DOWN	TENM2	-2.69858	5.3634	3.34241e-05	0.00358951	0.154044
DOWN	PFKFB2	-2.7937	3.75459	0.000519856	0.0298702	0.144216
DOWN	NDRG2	-2.10954	9.07257	3.79801e-06	0.00064645	0.231721
DOWN	MMRN1	-1.24406	7.78669	7.8284e-05	0.00716954	0.422182
DOWN	LOC110074423	-4.50089	6.33605	1.61178e-12	7.26992e-09	0.0441668
DOWN	VIP	-3.71827	3.36906	0.000410532	0.0246074	0.0759783
DOWN	PLPPR4	-1.45317	5.57541	0.000254038	0.0176253	0.365217
DOWN	SGCG	-2.69417	3.65652	2.90793e-05	0.00326357	0.154516
DOWN	LOC110085094	-3.02719	4.0063	0.000760811	0.0395578	0.122666
DOWN	STAB2	-1.85309	7.29125	6.00627e-06	0.000856517	0.276799
DOWN	LOC110074318	-3.02839	4.62375	4.76869e-06	0.000761605	0.122564
DOWN	LOC110076957	-1.96922	9.55424	1.4181e-05	0.00177676	0.255392
DOWN	LOC110071139	-4.52417	4.84031	1.92379e-07	6.20035e-05	0.0434601
DOWN	LOC110071127	-8.02798	3.78544	5.38023e-11	8.08918e-08	0.00383122
DOWN	TSPAN13	-2.62413	5.10801	1.11975e-05	0.00144303	0.162203
DOWN	XDH	-3.818	5.46072	6.26064e-05	0.00585256	0.0709035
DOWN	LOC110084498	-5.7126	8.33259	1.89933e-06	0.000370318	0.0190694
DOWN	LOC110072479	-6.03135	2.16225	0.000640647	0.0346065	0.0152891
DOWN	MAP1A	-2.56425	3.79115	0.000523724	0.0299969	0.169077
DOWN	HID1	-1.86951	5.8615	0.000323624	0.0208529	0.273667
DOWN	SORBS2	-1.72428	4.83237	0.000553684	0.0311892	0.30265
DOWN	RASEF	-5.40988	3.80299	3.81096e-07	0.000110899	0.0235215
DOWN	ATP7B	-4.14966	4.99795	6.07019e-08	2.34941e-05	0.0563414
DOWN	BARX1	-4.02125	5.78683	4.44273e-10	4.45309e-07	0.0615863
DOWN	EAF2	-2.89371	5.5409	1.8607e-06	0.00036891	0.134557
DOWN	QSOX1	-2.99738	8.98335	1.28742e-09	9.17719e-07	0.125228
DOWN	SH3TC2	-1.86474	4.73219	0.000441777	0.0260475	0.274573
DOWN	LOC110086874	-5.60754	3.16947	0.000497893	0.0290185	0.0205099
DOWN	SYTL2	-1.13482	6.04221	0.000918678	0.0456606	0.455391
DOWN	LOC110073403	-4.13502	4.62425	8.35481e-07	0.00020299	0.0569162
DOWN	TNMD	-4.37409	3.11708	4.04987e-05	0.0041753	0.0482245
DOWN	SLC18A3	-6.17925	2.24163	0.000565639	0.031598	0.0137994
DOWN	GRIA2	-6.67519	2.64165	8.97968e-05	0.00779018	0.00978513
DOWN	CABLES2	-1.48656	5.64538	0.000534356	0.0304498	0.356862
DOWN	LOC110087156	-3.44451	3.72261	0.00017252	0.0128091	0.091854
DOWN	LOC110090699	-6.33662	2.38635	0.000404421	0.0244844	0.0123733
DOWN	LOC110089780	-1.58649	5.69399	0.000281817	0.0190432	0.332981
DOWN	CNTN5	-2.18596	6.3444	3.27144e-05	0.00353433	0.219766
DOWN	SHROOM1	-2.39285	4.50561	0.000291937	0.0194518	0.190406
DOWN	SLC4A4	-2.79328	6.81228	8.38586e-08	3.02595e-05	0.144258
DOWN	PRSS8	-4.61384	5.09697	5.00227e-09	2.91132e-06	0.0408409
DOWN	ADCY8	-4.35697	4.28864	0.000282943	0.019048	0.0488
DOWN	TPPP	-1.53036	5.06963	0.000554913	0.0311892	0.34619
DOWN	SLC4A11	-2.61155	4.52454	0.000270661	0.0185575	0.163623
DOWN	LOC110088364	-3.93113	2.97591	0.000709445	0.0377575	0.065556
DOWN	LOC110075058	-6.9778	5.30936	1.61281e-06	0.000326947	0.00793363
DOWN	VWDE	-1.90534	4.96576	8.40274e-06	0.00112298	0.266953
DOWN	STK39	-1.92381	6.37296	0.000318592	0.0206764	0.263558
DOWN	LOC110077598	-2.06976	6.45932	0.000368651	0.0230945	0.2382
DOWN	LOC110077510	-6.7181	2.7101	3.14403e-06	0.000556123	0.00949837
DOWN	CAPN9	-4.51193	4.84229	6.18524e-07	0.000162467	0.0438303
DOWN	LOC110077506	-5.88835	7.98468	1.32251e-09	9.17719e-07	0.0168823
DOWN	LOC110077509	-5.5038	3.8796	6.53305e-06	0.000906687	0.022039
DOWN	ARHGEF38	-8.10186	3.85846	1.62475e-11	3.58812e-08	0.00363995
DOWN	LOC110091710	-5.53494	4.38354	1.57706e-06	0.000323333	0.0215683
DOWN	SOX9	-1.67568	6.83331	6.58947e-05	0.00612821	0.313019
DOWN	LOC110078705	-1.30262	5.62332	0.000368157	0.0230945	0.40539
DOWN	LOC110088843	-6.28425	6.84663	1.21621e-06	0.000261046	0.0128308
DOWN	NBEA	-1.12172	7.7463	0.000544789	0.0308122	0.459547
DOWN	PI16	-1.88948	5.21379	2.11822e-05	0.00251427	0.269905
DOWN	LOC110086130	-4.21905	3.2686	0.000393616	0.0241552	0.0536959
DOWN	GUCY1A2	-2.82692	4.20072	2.34547e-05	0.00271263	0.140933
DOWN	LRP1B	-1.60367	5.99923	4.81385e-05	0.00472019	0.32904
DOWN	LOC110088706	-5.90543	6.27456	5.06555e-06	0.000761605	0.0166836
DOWN	CUNH1orf210	-3.24618	4.01632	1.02063e-05	0.0013441	0.105391
DOWN	LOC110090914	-1.62174	7.07208	4.02167e-06	0.000672797	0.324943
DOWN	PIGR	-4.55769	6.89638	5.58599e-08	2.29051e-05	0.0424619
DOWN	BGLAP	-1.93463	8.6687	1.10187e-06	0.000251646	0.261589
DOWN	KIAA1324	-5.89274	4.32012	6.45033e-09	3.42285e-06	0.016831
DOWN	LOC110087369	-2.17779	6.31386	8.36412e-05	0.00743376	0.221014
DOWN	LOC110077993	-3.77367	3.82847	0.000700129	0.0374247	0.0731158
DOWN	LOC110075337	-3.70715	3.61617	0.000514591	0.0297572	0.0765659
DOWN	LOC110089936	-4.52854	12.6685	0.000517919	0.029854	0.0433285
DOWN	LOC110089916	-2.47635	4.66347	5.43039e-06	0.000809711	0.179699
DOWN	LOC110077930	-4.76102	6.01662	2.54271e-05	0.00292201	0.0368801
DOWN	STMN2	-6.96818	2.81667	0.000164582	0.0123725	0.00798672
DOWN	LOC110090818	-3.01307	5.83236	4.63916e-08	2.04146e-05	0.123873
DOWN	FMOD	-4.53115	6.82849	4.10441e-14	2.46839e-10	0.0432502
DOWN	LOC110087229	-4.40014	4.05817	8.55075e-07	0.00020299	0.0473615
DOWN	LOC110087221	-6.10873	5.01093	7.63733e-16	6.88963e-12	0.0144907
DOWN	LOC110087219	-6.19388	9.36923	2.81907e-11	4.62378e-08	0.0136602
DOWN	HEBP2	-1.5482	7.24214	1.90886e-06	0.000370318	0.341936
	HTR4	1.17007	3.63062	0.117156	0.850335	2.25023
	CRHBP	-4.01382	1.17423	0.198277	0.984534	0.0619043
	HTR7	-0.0761708	1.52198	1	1	0.948572
	LURAP1L	-0.884559	3.48121	0.284497	1	0.541653
	FAM19A2	1.28543	4.34069	0.0154233	0.319566	2.43754
	FAM19A1	-1.6874	1.20488	0.499657	1	0.310485
	BBX	-0.106863	6.99677	0.736751	1	0.928605
	FAM19A5	-0.645633	3.70426	0.281089	1	0.639212
	CUNH12orf4	0.0242969	4.57748	0.972017	1	1.01698
	FAM19A3	-0.408082	2.35118	0.821215	1	0.753625
	WDR83OS	0.530817	3.72699	0.559751	1	1.44475
	BCR	-0.114692	5.78887	0.757109	1	0.92358
	ORAI3	0.822348	3.4522	0.205155	0.991008	1.76828
	ORAI2	1.389	1.80872	0.25283	1	2.61898
	AGTR1	-0.399027	5.96013	0.272601	1	0.75837
	VOPP1	0.712403	5.71752	0.0369716	0.525232	1.63853
	AGTR2	0.316468	4.38033	0.56508	1	1.24528
	COL13A1	-0.799671	4.58967	0.158575	0.927596	0.57448
	TARSL2	0.426223	4.30063	0.476449	1	1.34371
	SHMT2	0.307226	4.12255	0.568593	1	1.23733
	SHMT1	-0.998802	2.76972	0.334981	1	0.500415
	B3GLCT	0.369196	5.69714	0.309327	1	1.29163
	RDH10	-0.629332	5.04599	0.165991	0.937637	0.646476
	NEBL	0.00181655	6.72572	1	1	1.00126
	DHFR	0.304281	4.34454	0.526755	1	1.2348
	PKIB	0.769891	2.50826	0.449876	1	1.70514
	PKIA	-0.194211	4.54199	0.675693	1	0.874051
	STRN	-0.30912	7.46415	0.315776	1	0.807134
	PKIG	-2.3943	2.64776	0.0302885	0.472746	0.190214
	KCNC1	-2.04338	0.776356	1	1	0.242595
	KCNC2	1.79762	1.14614	0.502611	1	3.47647
	KCNC4	-0.890182	2.62991	0.463477	1	0.539546
	GLT1D1	-1.71188	1.76512	0.29036	1	0.305261
	NEFL	-1.85204	1.97888	0.171645	0.946941	0.277
	NEFM	-5.9234	2.03298	0.00676181	0.196769	0.016477
	STUM	-2.29321	2.97702	0.0348042	0.51302	0.204021
	MYBPC3	1.84279	1.15238	0.498447	1	3.58703
	MYBPC1	-0.657988	3.46882	0.439652	1	0.633762
	MYBPC2	-2.6205	2.9093	0.0466695	0.588352	0.162611
	KCND1	-0.0471758	1.23147	1	1	0.967829
	KCND2	0.759832	1.30068	0.781704	1	1.69329
	GSTO1	0.228679	6.30212	0.484482	1	1.17176
	KCND3	-0.180039	0.882835	1	1	0.882679
	BGN	0.758568	7.11697	0.038231	0.531179	1.69181
	TMEFF1	-0.0518911	4.22898	0.965702	1	0.964671
	TMEFF2	-0.104966	2.76964	0.940816	1	0.929827
	LOC110078188	-0.920939	2.02004	0.550587	1	0.528165
	PKN3	-1.21124	3.56552	0.0778141	0.738838	0.431899
	SYNPO2	-0.390828	5.37137	0.357544	1	0.762692
	GSTP1	-0.0752845	4.59353	0.948182	1	0.949155
	PTAFR	2.05977	3.45885	0.00434051	0.144753	4.16921
	KCNA2	-3.54025	1.00752	0.22527	0.991417	0.0859565
	KIAA2022	-0.324192	3.92056	0.552582	1	0.798745
	KCNA4	1.11756	1.33167	0.609808	1	2.16979
	SDAD1	0.201489	5.59722	0.588727	1	1.14988
	ADAM28	-0.33725	5.58079	0.526035	1	0.791549
	ADAM23	-0.750214	4.58253	0.141402	0.899868	0.594516
	STX6	0.174698	5.02928	0.681038	1	1.12873
	STX5	-0.417973	4.67264	0.392367	1	0.748475
	STX4	-0.268344	5.84981	0.438083	1	0.830272
	LOC110078182	0.0798035	6.49404	0.798374	1	1.05687
	STX3	0.201073	4.7799	0.729705	1	1.14955
	STX2	-0.296097	4.37109	0.571914	1	0.814453
	BID	0.142337	3.90752	0.793891	1	1.10369
	SPDEF	1.05494	1.40556	0.823893	1	2.07763
	MBD3	0.386062	4.32939	0.429091	1	1.30682
	MBD4	0.0511159	3.42257	1	1	1.03607
	LOC110078179	-0.49374	5.94492	0.188585	0.974353	0.710182
	MBD5	-0.298669	6.26762	0.349467	1	0.813002
	MBD6	-0.559089	3.91362	0.342977	1	0.678731
	PKLR	-0.134127	5.74097	0.728414	1	0.911221
	KCNB1	0.644947	2.91353	0.521555	1	1.56368
	MBD1	-0.134432	4.85098	0.762046	1	0.911028
	KCNB2	-0.03344	4.80939	1	1	0.977088
	LOC110080499	0.369438	1.30131	1	1	1.29185
	KIAA2012	0.391089	1.75912	1	1	1.31138
	KIAA2013	-0.596887	2.83386	0.440512	1	0.661179
	LOC110080494	-1.94288	0.768694	1	1	0.260096
	MITD1	-0.525091	4.16711	0.472015	1	0.694915
	PKN2	0.0387306	7.12211	0.895547	1	1.02721
	PKN1	0.177455	6.83709	0.561202	1	1.13089
	LOC110078176	0.0850595	6.41503	0.834531	1	1.06073
	LOC110078166	-0.54082	1.90715	0.78342	1	0.68738
	LOC110080487	-0.18299	3.06025	0.834025	1	0.880875
	KCNG1	0.288216	1.80373	0.859053	1	1.22113
	KCNG2	-2.21181	3.06383	0.008871	0.231622	0.215864
	KCNG3	1.05085	2.59903	0.262907	1	2.07174
	LOC110078168	1.27616	1.58917	0.47592	1	2.42194
	RASL11B	1.31121	5.76981	0.0232694	0.406809	2.48149
	RASL11A	3.46459	1.80344	0.124837	0.867032	11.0394
	FBXO28	-0.133897	5.38895	0.752857	1	0.911366
	GOLIM4	-0.324497	6.81537	0.331146	1	0.798577
	FBXO25	-0.135705	4.56426	0.777408	1	0.910225
	FBXO24	-1.94288	0.768694	1	1	0.260096
	FBXO21	-0.410204	6.02576	0.205674	0.991348	0.752517
	FBXO22	0.0132962	5.1513	0.954403	1	1.00926
	FADS2	-0.759158	5.1366	0.0851742	0.766823	0.590841
	PTAR1	-0.578294	5.20284	0.163723	0.935508	0.669755
	POFUT2	-0.182269	5.96141	0.606731	1	0.881316
	FNTA	0.427538	5.6382	0.21821	0.991417	1.34494
	POFUT1	0.108459	6.62254	0.739402	1	1.07808
	FADS6	0.351401	2.40626	0.784287	1	1.2758
	NEK1	0.334795	6.6757	0.262322	1	1.2612
	TNFRSF8	-2.77247	0.88053	0.56362	1	0.146354
	NEK2	-0.072909	3.23804	1	1	0.950719
	LOC110079491	2.70866	0.876801	0.56362	1	6.53713
	NEK3	-0.117205	4.93946	0.807743	1	0.921972
	LOC110078163	-0.180039	0.882835	1	1	0.882679
	FADS1	-0.148605	4.82985	0.779242	1	0.902122
	KCNH2	-1.95359	1.24815	0.395703	1	0.258174
	PIAS4	0.618924	3.33851	0.48328	1	1.53573
	PIAS3	0.0787927	4.56249	0.920875	1	1.05613
	LOC110080474	-1.40786	1.84418	0.323482	1	0.376871
	LOC110079489	-1.72999	1.15412	0.514122	1	0.301454
	KCNH4	-1.7538	0.752711	1	1	0.29652
	DGAT2	-0.678715	2.70001	0.530486	1	0.624722
	LOC110079488	-0.0401182	4.37793	1	1	0.972575
	FBXO18	-1.04918	3.61296	0.112288	0.835705	0.483241
	DGAT1	-0.00673558	3.74248	1	1	0.995342
	KCNH7	-4.06835	1.18167	0.114922	0.84187	0.0596079
	KCNH8	-5.58541	1.7914	0.0198267	0.371266	0.0208269
	FBXO16	0.547053	2.03666	0.800928	1	1.4611
	STX8	0.0886848	5.41523	0.826731	1	1.0634
	STX7	-0.493132	6.68408	0.113341	0.836978	0.710481
	FBXO15	-0.549912	2.08741	0.657247	1	0.683062
	FBXO10	0.618416	3.58732	0.308679	1	1.53519
	FBXO11	-0.0888339	7.59329	0.774394	1	0.940282
	PIAS2	-0.272738	5.57107	0.454092	1	0.827747
	PIAS1	0.590388	5.67414	0.0932387	0.787898	1.50565
	LENG1	0.0100681	3.1224	1	1	1.007
	MINPP1	0.126587	6.76853	0.676734	1	1.09171
	DMTF1	0.154012	5.102	0.739254	1	1.11266
	PKP2	-0.568494	5.99384	0.150611	0.91773	0.67432
	PKP1	0.13891	8.65431	0.685728	1	1.10107
	PKP4	0.064322	8.12626	0.83257	1	1.04559
	PKP3	-0.244292	7.46508	0.496696	1	0.84423
	LOC110078150	-0.470138	2.60152	0.656877	1	0.721896
	LOC110078152	1.22465	3.2629	0.140695	0.89865	2.33699
	LOC110078154	-2.04338	0.776356	1	1	0.242595
	LOC110078144	1.95112	0.770582	1	1	3.86674
	LOC110078145	1.86334	0.763335	1	1	3.63849
	KCNE1	-2.92522	0.938877	0.56362	1	0.13165
	LOC110080463	0.325938	2.3806	0.841791	1	1.25348
	KCNE3	0.108693	2.11477	1	1	1.07825
	KCNE4	0.463335	2.04274	0.767759	1	1.37873
	LOC110079479	-0.121127	4.56227	0.80413	1	0.919469
	ZC4H2	-0.325722	2.70384	0.682557	1	0.797899
	IREB2	-0.0182711	5.63631	0.962445	1	0.987415
	FBXO48	-3.30395	0.984784	0.345431	1	0.101254
	FBXO45	-0.20433	3.05345	0.880875	1	0.867942
	FBXO46	-0.350336	3.86811	0.577294	1	0.784401
	FBXO43	1.38688	1.16024	0.797791	1	2.61512
	LOC110081792	0.140539	2.40334	1	1	1.10232
	NPAS2	-0.149328	4.99144	0.775294	1	0.901671
	FBXO41	-2.04338	0.776356	1	1	0.242595
	NPAS3	-0.613822	4.47215	0.204064	0.988992	0.653463
	FBXO42	0.162556	4.17691	0.813959	1	1.11927
	FBXO40	0.731447	1.41615	0.810922	1	1.6603
	MBIP	0.206676	4.40778	0.693926	1	1.15403
	BMF	-0.492743	6.92775	0.156232	0.923268	0.710673
	LOC110079470	-2.04338	0.776356	1	1	0.242595
	LOC110078143	-0.547915	1.19968	1	1	0.684008
	NEK8	-2.3781	2.91849	0.00647851	0.19288	0.192363
	LOC110081785	0.152944	3.361	0.779776	1	1.11184
	NEK9	-0.179643	6.78016	0.541797	1	0.882922
	KCNF1	-0.384467	1.66118	0.847214	1	0.766062
	LOC110078136	3.76981	1.14755	0.197399	0.984534	13.6404
	SDF2L1	0.297767	4.19114	0.602458	1	1.22924
	LOC110081782	-0.243632	4.8927	0.604283	1	0.844617
	NEK4	0.33255	5.32434	0.421473	1	1.25924
	LOC110080458	-0.11889	2.53946	1	1	0.920896
	LOC110078137	0.168649	1.80143	1	1	1.12401
	HTR1E	-0.0716539	1.06426	1	1	0.951547
	HTR1F	-3.33606	0.98446	0.345431	1	0.0990253
	NEK5	-0.724357	3.16296	0.421592	1	0.605267
	LOC110078138	-0.300768	4.12095	0.679207	1	0.81182
	FBXO38	-0.382521	5.60446	0.283368	1	0.767096
	NEK6	-0.0595834	6.34222	0.872281	1	0.959541
	TNFRSF9	1.86334	0.763335	1	1	3.63849
	NEK7	0.423112	7.17601	0.139805	0.897002	1.34082
	HTR1D	-2.86093	0.888137	0.56362	1	0.137649
	STYX	0.140736	4.043	0.825111	1	1.10247
	FBXO36	-1.61965	1.1397	0.697404	1	0.325415
	HTR1B	0.781205	1.96995	0.604302	1	1.71857
	FBXO34	0.38943	4.05394	0.465929	1	1.30988
	BMX	-4.05866	2.07987	0.0207614	0.381444	0.0600096
	FBXO32	-0.730902	6.04938	0.0347901	0.51302	0.602527
	LOC110080450	-0.0791641	5.24106	0.853827	1	0.946606
	FBXO33	-0.155841	5.54489	0.7049	1	0.897609
	FBXO30	-0.145654	6.57656	0.709025	1	0.903969
	FBXO31	0.164916	4.09595	0.798068	1	1.1211
	DRAP1	0.537597	4.59275	0.313179	1	1.45155
	LOC110081779	-0.637964	3.21032	0.326785	1	0.642619
	LOC110080448	2.63844	0.869973	0.56362	1	6.22658
	MNAT1	-0.384998	4.45478	0.426225	1	0.76578
	LOC110079461	1.76278	1.13933	0.540576	1	3.39352
	KCNK5	0.68432	4.96707	0.104074	0.81286	1.60694
	LOC110081774	-3.05243	0.954117	0.56362	1	0.120539
	PIWIL2	1.08408	1.07359	0.705912	1	2.12003
	BCAR3	-0.0111431	3.56226	1	1	0.992306
	PIWIL1	-0.519661	1.85858	0.794987	1	0.697536
	LOC110078123	-0.0922624	0.890012	1	1	0.938051
	PIWIL4	4.57309	1.45147	0.0657297	0.688274	23.8033
	LOC110078124	1.28261	7.88339	0.0947518	0.795131	2.43279
	KCNK7	-3.33606	0.98446	0.345431	1	0.0990253
	ALAS2	0.674355	4.00107	0.403745	1	1.59588
	ALAS1	-0.402316	6.09502	0.284352	1	0.756643
	ONECUT2	-1.94288	0.768694	1	1	0.260096
	LOC110079457	1.15129	4.55771	0.01671	0.332761	2.22112
	LOC110080446	-0.148424	2.0054	1	1	0.902235
	LOC110078128	-3.3711	1.03738	0.345431	1	0.0966492
	LOC110079459	3.50131	1.06194	0.22527	0.991417	11.324
	LOC110081775	0.506425	4.00214	0.397131	1	1.42053
	LOC110078129	-2.77247	0.88053	0.56362	1	0.146354
	HTR2B	-0.146041	1.40795	1	1	0.903727
	PPWD1	0.312072	4.41955	0.506778	1	1.24149
	HTR2C	1.40031	1.3762	0.636308	1	2.63959
	HTR2A	1.25272	1.07368	0.705912	1	2.38291
	NENF	-0.140814	4.13258	0.804374	1	0.907007
	TNFSF13B	0.754136	1.61292	0.52148	1	1.68662
	BOC	-0.0841589	8.14593	0.795095	1	0.943334
	LOC110080439	0.589083	0.981286	1	1	1.50429
	SPDL1	0.361315	3.68811	0.653822	1	1.2846
	NEO1	0.219082	8.61686	0.489908	1	1.16399
	BCAS2	0.072104	4.50978	0.897732	1	1.05125
	BCAS1	-0.980683	5.67014	0.00805704	0.215996	0.50674
	BOK	0.151524	4.04116	0.760438	1	1.11074
	LOC110081763	-0.39156	2.47373	0.685481	1	0.762305
	BCAS3	0.435056	5.03367	0.332958	1	1.35196
	LOC110080430	-0.04154	5.97281	0.910768	1	0.971617
	LOC110081761	-2.04338	0.776356	1	1	0.242595
	PIANP	-1.2542	2.60251	0.203532	0.988238	0.419225
	LOC110081767	-1.0805	4.17715	0.0468439	0.588549	0.472866
	LOC110081766	0.268081	4.6664	0.568911	1	1.20421
	LOC110078117	0.965074	2.87576	0.304578	1	1.95216
	VPS13C	-0.215148	7.41822	0.452005	1	0.861457
	LOC110081765	-0.217141	4.11376	0.742401	1	0.860269
	VPS13D	0.149641	6.30593	0.66797	1	1.10929
	DHPS	0.037313	4.342	1	1	1.0262
	VPS13A	0.0380189	7.96756	0.897591	1	1.0267
	VPS13B	0.0761117	7.87376	0.792575	1	1.05417
	RABGGTB	-0.0265813	5.93767	0.954429	1	0.981744
	RABGGTA	-0.235832	3.76534	0.656214	1	0.849195
	NEMF	0.0808839	4.49648	0.936282	1	1.05767
	C1D	-0.0890647	4.4899	0.91167	1	0.940132
	LOC110081757	1.46129	1.76036	0.307113	1	2.75355
	BCAT1	-0.161174	4.00815	0.837141	1	0.894297
	BCAT2	-0.0491957	5.22297	0.899782	1	0.966475
	LOC110078101	-0.148109	2.18478	1	1	0.902433
	LOC110081750	-3.89598	1.24409	0.185863	0.970282	0.0671728
	LOC110081756	-2.04338	0.776356	1	1	0.242595
	LRTM2	-0.0795424	0.875246	1	1	0.946358
	LENG9	0.732937	3.29494	0.284829	1	1.66202
	LENG8	0.281298	6.76412	0.407065	1	1.21529
	U2AF1	-0.0894523	6.05687	0.804251	1	0.939879
	IL2RG	0.417566	2.28423	0.822863	1	1.33567
	CUNHXorf57	0.478787	5.18767	0.202923	0.98639	1.39357
	CUNHXorf56	-0.125949	3.69381	0.851055	1	0.916401
	CUNHXorf58	1.38123	1.05204	0.705912	1	2.6049
	U2AF2	0.124247	6.57408	0.724152	1	1.08994
	LOC110080418	1.32991	1.48086	0.549522	1	2.51387
	DRAM2	-0.711021	4.65948	0.1128	0.835784	0.610888
	SLC36A4	-1.2278	1.73935	0.487029	1	0.426969
	KCNJ1	1.85966	0.763021	1	1	3.62922
	KCNJ2	-1.61272	5.62312	0.00222916	0.0880055	0.326981
	LOC110079430	-0.0875676	5.2978	0.865787	1	0.941108
	KCNJ3	-2.9514	0.895773	0.345431	1	0.129283
	KCNJ4	-0.681035	1.58899	0.842752	1	0.623718
	COL26A1	0.752061	2.89674	0.569111	1	1.6842
	LOC110079422	-0.0774739	8.01102	0.809659	1	0.947716
	KCNJ8	-0.259273	4.29505	0.606679	1	0.835509
	GPKOW	0.25771	4.62055	0.625829	1	1.19558
	LOC110081745	0.695555	0.974376	1	1	1.61951
	LOC110080413	2.63246	0.869357	0.56362	1	6.20084
	LOC110081743	-0.251645	3.91491	0.723915	1	0.839938
	GSTZ1	0.465271	3.32285	0.508368	1	1.38058
	IL2RB	1.41449	1.98257	0.301816	1	2.66566
	LOC110080406	-0.199176	4.16109	0.712939	1	0.871048
	KCNK1	0.215264	4.41312	0.714512	1	1.16092
	KCNK2	-0.068365	2.33016	1	1	0.953718
	KCNK3	3.19153	1.82762	0.102056	0.808571	9.13578
	BCAR1	0.00956497	3.26078	1	1	1.00665
	CUNHXorf65	-1.7538	0.752711	1	1	0.29652
	LOC110081850	-0.354331	3.28039	0.595038	1	0.782232
	SLC23A2	0.0631593	5.56964	0.882685	1	1.04475
	LOC110081855	-0.391825	1.59057	0.840217	1	0.762165
	CERK	-0.0309045	5.47776	0.960252	1	0.978806
	LOC110078203	-0.585474	1.22103	1	1	0.666431
	LOC110081854	0.101022	3.99984	0.897506	1	1.07253
	LOC110078205	-0.519564	4.89618	0.217725	0.991417	0.697583
	SLC23A1	-0.0922624	0.890012	1	1	0.938051
	LOC110081852	0.541698	4.22274	0.359756	1	1.45568
	LGALSL	-0.272354	5.10611	0.611297	1	0.827968
	CCP110	0.482128	5.65281	0.192923	0.981023	1.3968
	LOC110078208	-0.729136	1.385	0.793099	1	0.603265
	LOC110078209	-1.94288	0.768694	1	1	0.260096
	PEX26	-0.302601	3.33975	0.647241	1	0.810789
	LGALS4	-3.33606	0.98446	0.345431	1	0.0990253
	LGALS3	-0.04136	7.64901	0.917562	1	0.971738
	LGALS1	0.375887	8.79918	0.30683	1	1.29764
	BSG	-0.521285	7.81642	0.116588	0.848135	0.696751
	LOC110080516	-1.58598	2.16946	0.262025	1	0.333099
	LOC110081847	-0.109829	2.00643	1	1	0.926698
	LOC110081846	0.549323	3.49192	0.41301	1	1.4634
	ATXN7L1	0.599528	5.75378	0.0961409	0.801559	1.51522
	LOC110081845	-0.355247	3.08451	0.714541	1	0.781736
	BSN	-0.552452	3.97355	0.41654	1	0.68186
	ATXN7L2	-1.06679	1.51728	0.639653	1	0.47738
	LGALS8	0.0734988	6.42334	0.8275	1	1.05227
	ATXN7L3	0.241718	6.34832	0.468188	1	1.1824
	LOC110081843	-1.25442	4.35112	0.145473	0.91121	0.419163
	LOC110080512	0.914575	1.1501	0.727523	1	1.88501
	GOLPH3L	-0.376381	4.96875	0.384394	1	0.770368
	BTC	-0.930416	1.5106	0.780955	1	0.524707
	BTD	-0.44103	4.23425	0.427631	1	0.736608
	CFDP1	0.211439	3.79825	0.769665	1	1.15784
	SOAT1	0.557535	5.29321	0.147635	0.915025	1.47175
	CRISPLD1	0.729636	3.40147	0.4707	1	1.65822
	CRISPLD2	-0.484335	6.9163	0.122801	0.866564	0.714827
	NINJ2	-1.20118	3.96591	0.0221416	0.397552	0.43492
	SUB1	0.125342	6.58141	0.708252	1	1.09077
	KCNQ1	-0.384278	2.54899	0.764551	1	0.766163
	KCNQ2	2.63246	0.869357	0.56362	1	6.20084
	NINJ1	0.0014166	6.10255	1	1	1.00098
	KCNQ3	-2.82355	1.49042	0.121382	0.86269	0.141263
	BTK	0.803554	2.59794	0.364438	1	1.7454
	KCNQ4	-0.28239	1.548	0.847532	1	0.822228
	KCNQ5	0.605495	4.79697	0.153435	0.91773	1.5215
	LOC110081839	2.70866	0.876801	0.56362	1	6.53713
	LOC110080507	2.87308	2.10931	0.043073	0.569738	7.32627
	GRB7	-2.2557	2.54401	0.044329	0.576049	0.209395
	CETP	-0.82705	4.68523	0.112079	0.835705	0.563681
	DHX8	-0.305228	5.73086	0.410492	1	0.809314
	LOC110080502	0.175859	3.62268	0.862376	1	1.12964
	RRAD	1.1691	1.30365	0.584291	1	2.24871
	DHX9	-0.100474	6.53902	0.736871	1	0.932726
	LOC110081831	-0.23234	6.29424	0.455899	1	0.851253
	ZBTB1	-0.158445	4.60378	0.747567	1	0.89599
	LOC110079518	1.91153	1.26333	0.589752	1	3.76208
	ZBTB5	-0.375497	5.03931	0.370083	1	0.77084
	ZBTB4	0.109801	6.22049	0.789742	1	1.07908
	ZBTB3	-0.103558	2.72563	1	1	0.930735
	ZBTB2	0.510825	4.79312	0.232485	1	1.42486
	NKAIN2	-1.22525	2.75187	0.205646	0.991348	0.427723
	NKAIN1	0.330402	3.86338	0.560861	1	1.25736
	NKAIN4	-0.0347425	5.01559	0.977944	1	0.976206
	NKAIN3	3.8407	1.15525	0.124508	0.867032	14.3274
	MRNIP	-0.958595	2.22076	0.484712	1	0.514558
	RRAS	0.414222	6.58863	0.191666	0.979657	1.33258
	RACGAP1	0.337077	3.9173	0.618724	1	1.26319
	NEU1	1.05048	3.99132	0.0449065	0.577721	2.07121
	KCNN1	0.640931	3.8115	0.341097	1	1.55934
	FAM192A	-0.518201	4.87643	0.200067	0.985524	0.698242
	KCNN2	-0.750359	1.99472	0.605714	1	0.594455
	LOC110081824	-0.562168	1.32819	0.802001	1	0.677283
	KCNN3	-1.3392	1.376	0.455058	1	0.39524
	LOC110081828	-0.215193	2.47374	0.85109	1	0.861431
	SLC10A4	-4.96152	1.51649	0.0320944	0.489888	0.0320946
	NTNG1	0.264383	5.89404	0.537316	1	1.20112
	BBS2	0.329218	3.97074	0.578823	1	1.25633
	BBS1	-0.819566	3.3525	0.250283	1	0.566612
	NTNG2	0.358775	2.2778	0.841639	1	1.28234
	XBP1	0.294986	4.60527	0.611531	1	1.22687
	SLC10A7	-0.387519	5.57408	0.363467	1	0.764443
	YES1	0.154332	6.0445	0.635628	1	1.11291
	SLC10A1	1.86334	0.763335	1	1	3.63849
	LOC110081820	0.168678	3.99531	0.786488	1	1.12403
	SLC10A3	-0.679673	2.91491	0.440585	1	0.624307
	SUCO	-0.317462	6.17819	0.351827	1	0.80248
	LOC110079509	0.150256	6.9695	0.658837	1	1.10977
	ZBTB9	-1.84399	2.16813	0.146673	0.912534	0.27855
	NET1	0.172773	8.87633	0.588197	1	1.12722
	PEX5L	0.0224721	1.5994	1	1	1.0157
	ZBTB6	0.359545	3.71893	0.55858	1	1.28302
	SPDYA	-0.086849	2.46522	1	1	0.941577
	GRB2	-0.0627366	5.70811	0.893797	1	0.957446
	LOC110081816	0.261176	3.94729	0.674935	1	1.19846
	C8B	2.36384	2.0256	0.278521	1	5.14739
	TFB1M	-0.00656956	4.75952	1	1	0.995457
	KCNT1	0.235501	1.72235	1	1	1.17732
	KCNT2	-2.47505	1.79401	0.0655108	0.688274	0.17986
	SUFU	0.216227	6.39314	0.494218	1	1.16169
	LOC110091105	0.4273	1.81795	0.872928	1	1.34471
	BBS7	-0.0254053	5.73304	0.949232	1	0.982545
	BBS5	-0.65715	3.50065	0.295229	1	0.63413
	BBS4	0.224968	4.83399	0.66224	1	1.16875
	LOC110081806	0.111004	4.12287	0.912858	1	1.07998
	ZHX2	0.282047	4.57039	0.607108	1	1.21592
	PCYT1B	-0.235319	2.71418	0.93269	1	0.849497
	FCER1G	2.01199	3.2332	0.0055756	0.172252	4.03339
	ZHX3	0.222036	6.44228	0.485323	1	1.16638
	PCYT1A	-0.407566	4.02456	0.488024	1	0.753894
	LOC110081800	-0.509253	2.63296	0.623626	1	0.702586
	LOC110091108	2.43322	1.47516	0.322272	1	5.40099
	AGTRAP	0.744167	3.5464	0.26857	1	1.67501
	CACYBP	-0.464986	5.755	0.202665	0.98639	0.724478
	TFB2M	-0.494158	5.04559	0.250802	1	0.709976
	LOC110091109	0.390264	5.12195	0.35226	1	1.31063
	ZHX1	-0.286115	4.80365	0.536291	1	0.820108
	RNF144A	-0.377137	6.57898	0.241941	1	0.769964
	MC3R	-3.30395	0.984784	0.345431	1	0.101254
	RNF144B	-0.468265	4.83395	0.354279	1	0.722833
	PITPNM1	-0.513668	4.8929	0.236651	1	0.700439
	PITPNM3	-0.593854	3.34635	0.358559	1	0.662571
	PITPNM2	-0.166191	5.0693	0.667682	1	0.891192
	TAX1BP1	-0.0569392	8.72935	0.853157	1	0.961301
	FAM32A	-0.203997	4.03546	0.705649	1	0.868142
	FAM193B	0.0949134	3.82172	0.956696	1	1.068
	FAM193A	0.107737	6.90703	0.73017	1	1.07754
	SSNA1	-0.0881334	5.99865	0.854232	1	0.940739
	FAM35A	-0.215804	4.56215	0.731804	1	0.861066
	LOC110091118	-3.83334	1.09743	0.154125	0.91773	0.0701534
	NEXN	0.15699	7.08935	0.643369	1	1.11496
	FAM196A	-0.08122	3.4675	1	1	0.945258
	PEX16	-0.618785	3.61823	0.301566	1	0.651219
	PEX19	-0.132975	4.48989	0.79136	1	0.911949
	KLHL2	0.884154	4.29768	0.105109	0.814247	1.84568
	KLHL3	0.589979	4.98775	0.156507	0.924286	1.50522
	PEX10	0.034507	2.33236	1	1	1.02421
	KLHL4	-1.18208	4.97777	0.00487412	0.156754	0.440716
	KCNRG	1.0889	1.69923	0.5986	1	2.12712
	CFAP157	0.779315	1.67163	0.709422	1	1.71632
	PEX12	-0.294949	3.09215	0.741553	1	0.815101
	PEX13	-0.324749	5.32156	0.457807	1	0.798437
	PEX14	0.00749254	3.62701	1	1	1.00521
	ETAA1	0.311027	2.99451	0.755452	1	1.24059
	LOC110091135	4.8721	1.54944	0.0253039	0.429072	29.2851
	TFAP4	0.0779658	2.65767	1	1	1.05553
	KLHL5	0.251015	4.42194	0.595448	1	1.19004
	KCNS1	0.00823444	0.882398	1	1	1.00572
	KCNS2	-2.86093	0.888137	0.56362	1	0.137649
	KLHL6	0.804571	1.67771	0.695115	1	1.74663
	KCNS3	1.6281	1.16058	0.478501	1	3.09106
	KLHL7	0.0911951	5.44052	0.869122	1	1.06525
	KLHL8	0.392676	6.23106	0.21149	0.991417	1.31283
	INPPL1	-0.0949285	5.67051	0.806113	1	0.936319
	PLAT	0.0157123	4.23274	1	1	1.01095
	PLB1	0.141336	2.02241	0.907326	1	1.10293
	IGF1R	-0.340055	8.00188	0.239659	1	0.790011
	TXN2	-0.352261	4.56615	0.454066	1	0.783355
	FAM198A	-0.736899	5.43473	0.067447	0.694335	0.600028
	LOC110091143	-1.16513	2.55383	0.151829	0.91773	0.445925
	LOC110091146	1.38879	1.46724	0.659399	1	2.61859
	LOC110091145	-1.26541	3.54008	0.0601984	0.66591	0.415983
	PPIP5K1	-1.00189	3.32162	0.218866	0.991417	0.499345
	PLAU	0.943037	4.5639	0.142017	0.89999	1.92257
	PPIP5K2	-0.0402425	6.27694	0.92189	1	0.972491
	LOC110091147	1.85966	0.763021	1	1	3.62922
	FAM198B	0.0755369	7.41484	0.820165	1	1.05375
	ENPP2	-0.525037	7.36822	0.0937137	0.789044	0.694941
	ENPP1	0.130109	7.15407	0.719014	1	1.09438
	ENPP4	-0.62322	3.63955	0.414452	1	0.64922
	ENPP3	-0.423973	4.84405	0.443904	1	0.745369
	ENPP6	-6.51155	2.37704	0.00209788	0.0839243	0.0109604
	ENPP5	-0.230772	5.45197	0.608512	1	0.852178
	TRNAI-AAU	1.86334	0.763335	1	1	3.63849
	CARD10	0.479049	3.37243	0.560666	1	1.39382
	ADAM11	1.83263	1.24977	0.580527	1	3.56185
	ADAM10	-0.0766188	7.18318	0.799019	1	0.948278
	DHDDS	1.21756	4.44464	0.0185543	0.357265	2.32552
	ADAM19	0.410079	3.36955	0.568709	1	1.32876
	ADAM17	0.0889933	6.75937	0.792118	1	1.06363
	BRMS1	-0.526543	3.57542	0.456225	1	0.694216
	ADAM15	-1.60314	2.99659	0.0344758	0.510683	0.32916
	LOC110091158	0.0183148	1.7326	1	1	1.01278
	CARD19	0.139155	5.25116	0.769368	1	1.10126
	ADAM12	-0.52702	6.19243	0.138771	0.894872	0.693987
	PLAA	0.587889	3.70266	0.317208	1	1.50305
	CARD14	-1.11886	2.962	0.129998	0.876142	0.460459
	CARD11	0.471026	2.99061	0.572949	1	1.3861
	HTRA4	-3.49388	1.10082	0.368349	1	0.0887642
	HTRA1	0.623708	7.34334	0.076927	0.734874	1.54083
	PLD5	-0.127923	1.2711	1	1	0.915148
	PLD4	2.47023	1.70922	0.0655098	0.688274	5.54131
	DAPP1	-0.320618	3.63593	0.64869	1	0.800727
	HTRA2	0.0041164	5.05544	1	1	1.00286
	PLD6	0.110194	1.84202	1	1	1.07937
	PLD1	-0.769346	5.7647	0.0387948	0.534478	0.586683
	PLD3	-0.26143	4.07012	0.688661	1	0.834261
	PLD2	0.26496	4.88579	0.553377	1	1.2016
	GRK3	1.16147	2.24752	0.278055	1	2.23685
	LOC110091167	2.68516	2.74646	0.0128804	0.291579	6.43154
	GRK2	0.0530838	5.24358	0.933646	1	1.03748
	GRK5	-0.260443	6.16332	0.42997	1	0.834831
	GRK7	2.63844	0.869973	0.56362	1	6.22658
	GRK6	0.443299	4.9869	0.339611	1	1.35971
	LOC110091160	-1.7538	0.752711	1	1	0.29652
	PIBF1	0.403465	4.38669	0.390734	1	1.32268
	LOC110091161	-0.0655124	6.22728	0.839592	1	0.955606
	LOC110091164	2.63246	0.869357	0.56362	1	6.20084
	LOC110091163	0.412955	5.20655	0.33037	1	1.33141
	FAM199X	0.175249	4.59657	0.697512	1	1.12916
	IGF2R	-0.0765234	7.97913	0.797982	1	0.94834
	BSPRY	-3.8507	1.1447	0.149562	0.91773	0.0693146
	LOC110091177	0.290476	3.26813	0.788345	1	1.22304
	LOC110091176	0.179117	2.1068	1	1	1.13219
	LOC110091179	-1.60275	2.43145	0.12314	0.866626	0.32925
	LOC110091178	4.35113	1.32768	0.0598575	0.665528	20.4089
	LOC110091171	0.41292	4.66694	0.431288	1	1.33138
	LOC110091170	0.319204	2.97719	0.747849	1	1.24764
	LOC110091173	0.0818824	4.01434	0.92824	1	1.0584
	LOC110091172	0.5113	3.94341	0.386122	1	1.42533
	LOC110091175	0.00176952	1.69799	1	1	1.00123
	LOC110091174	0.151179	4.71099	0.735689	1	1.11048
	ZMYND15	1.85966	0.763021	1	1	3.62922
	ZMYND19	-1.27266	2.15893	0.285811	1	0.413896
	PITPNC1	0.360127	6.86328	0.225462	0.991417	1.28354
	GRM1	-1.41097	1.36919	0.478838	1	0.376058
	GRM5	2.78573	0.884268	0.56362	1	6.89586
	GRM4	3.78242	1.14784	0.15911	0.927596	13.7601
	GRM7	-0.361665	2.96823	0.692171	1	0.778266
	ZIC2	-1.7538	0.752711	1	1	0.29652
	GRM6	2.07887	1.22715	0.374817	1	4.22475
	GRM8	-1.44828	1.4175	0.478494	1	0.366459
	LOC110091180	-0.700279	2.49332	0.58592	1	0.615453
	CA9	-1.87781	2.31052	0.145761	0.91121	0.272097
	MYBL2	1.01526	3.20046	0.165913	0.937492	2.02126
	CA8	-0.896379	2.10503	0.431025	1	0.537233
	LOC110091181	0.336567	3.37749	0.632114	1	1.26275
	LOC110091184	0.377642	2.05024	0.798812	1	1.29922
	LOC110091183	-0.893712	2.72363	0.311905	1	0.538227
	MYBL1	0.377377	3.0688	0.596766	1	1.29898
	CUNH12orf29	-0.064151	4.45004	0.940419	1	0.956508
	LOC110091185	-2.9514	0.895773	0.345431	1	0.129283
	SUN3	0.821993	2.77704	0.480626	1	1.76785
	SUN2	-0.436408	5.95443	0.212363	0.991417	0.738972
	SUN1	0.141817	8.21326	0.621161	1	1.10329
	ATP6AP1	0.687756	5.96655	0.123879	0.866626	1.61078
	CAD	-0.409339	4.71429	0.379761	1	0.752968
	ATP6AP2	-0.174942	6.9009	0.574963	1	0.885803
	HUNK	0.447247	3.15502	0.591309	1	1.36344
	ELF1	0.160046	7.00137	0.604721	1	1.11732
	CFAP100	-1.7538	0.752711	1	1	0.29652
	ELF2	-0.187522	6.61692	0.565055	1	0.878113
	ELF3	-1.20305	5.17043	0.0579144	0.654694	0.434355
	GFOD1	0.219969	5.15105	0.645057	1	1.16471
	CUNH12orf10	0.839071	4.08109	0.100752	0.807413	1.7889
	ELF5	-1.32652	1.91299	0.389817	1	0.398728
	CAT	-0.229248	6.19956	0.635792	1	0.853079
	GFOD2	0.143047	4.86548	0.776041	1	1.10423
	LOC110091191	0.353313	4.08594	0.458538	1	1.27749
	ZMYND10	-0.675299	2.663	0.478772	1	0.626202
	ZMYND11	0.0751776	8.10936	0.804786	1	1.05349
	ZMYND12	0.52145	1.43744	0.850165	1	1.4354
	SHANK1	-0.687187	5.08712	0.0965343	0.802614	0.621064
	PLEC	0.208668	9.68032	0.518311	1	1.15562
	RRN3	0.227033	5.62391	0.537912	1	1.17043
	DAPL1	-0.242612	4.85392	0.614158	1	0.845214
	CBL	0.00859256	5.11911	1	1	1.00597
	CUNH12orf40	-1.7538	0.752711	1	1	0.29652
	SV2C	-1.19161	4.63677	0.0218401	0.394434	0.437814
	SV2B	0.922961	2.48756	0.293482	1	1.896
	TBX22	1.58722	3.04039	0.0369747	0.525232	3.00471
	CUNH12orf43	-1.82507	1.61158	0.451047	1	0.282227
	SV2A	-0.426319	2.01478	0.757783	1	0.744158
	TBX21	3.50131	1.06194	0.22527	0.991417	11.324
	CUNH12orf45	0.353551	3.96094	0.555641	1	1.2777
	TBX20	1.09398	1.55822	0.578483	1	2.13462
	CLVS2	-1.02647	1.96566	0.350276	1	0.490909
	CUNH12orf49	-0.269722	5.09201	0.499342	1	0.829479
	RRM1	-0.00155152	4.49122	1	1	0.998925
	RRM2	-0.788066	5.21503	0.0516073	0.620076	0.57912
	HS3ST5	-0.609946	1.15616	1	1	0.655221
	HS3ST6	2.32339	2.02599	0.0723978	0.719104	5.00506
	SUOX	-0.414365	4.59714	0.341926	1	0.75035
	TBX18	1.5076	1.06588	0.705912	1	2.84337
	HS3ST1	0.087881	4.79939	0.894354	1	1.06281
	CD2	5.17823	1.75669	0.0234876	0.40983	36.2077
	TBX15	-1.1712	1.51741	0.522813	1	0.444052
	CCS	-1.08546	3.44863	0.105003	0.814126	0.471242
	CD6	-0.597739	1.34914	0.799432	1	0.660789
	CD5	0.575025	1.42325	1	1	1.4897
	CD9	-0.0942655	8.32453	0.768256	1	0.936749
	CDA	-0.78156	3.52681	0.273878	1	0.581737
	VPS29	0.0852843	5.23216	0.829756	1	1.0609
	FRMPD4	-2.36044	1.68937	0.156586	0.924291	0.194732
	FRMPD1	-0.15047	4.854	0.765727	1	0.900957
	GRPR	0.303594	2.46149	0.933429	1	1.23422
	ELK1	0.0414813	4.90679	0.952406	1	1.02917
	RRP8	0.561505	2.74885	0.554194	1	1.47581
	ELK3	0.348743	6.244	0.278512	1	1.27345
	RRP9	0.573081	3.64745	0.416232	1	1.4877
	ELK4	0.412062	5.69321	0.299437	1	1.33059
	ALCAM	-0.241203	8.63345	0.513772	1	0.84604
	VPS35	-0.236349	5.89008	0.49197	1	0.848891
	VPS36	-0.0890716	6.94495	0.796479	1	0.940128
	VPS39	-0.107742	6.12777	0.735672	1	0.928039
	VPS18	0.502346	5.93699	0.117863	0.852637	1.41652
	CLEC11A	-0.695068	6.39932	0.103604	0.81154	0.61768
	HUS1	-0.11113	5.09113	0.80858	1	0.925862
	CEL	-1.11333	2.88179	0.175977	0.953839	0.462227
	NUP93	0.955985	4.49125	0.0541841	0.635089	1.9399
	BCAN	-0.318406	3.48887	0.761361	1	0.801956
	BCAM	0.14543	5.95025	0.711688	1	1.10606
	HECW2	-0.352615	5.39406	0.370989	1	0.783163
	HECW1	-1.10438	2.9243	0.230644	1	0.465103
	TARS2	-0.266697	5.36636	0.474151	1	0.831221
	SRFBP1	0.101448	5.90271	0.746335	1	1.07285
	NUP98	-0.135359	5.81196	0.699659	1	0.910443
	VPS25	0.177073	3.78313	0.821101	1	1.13059
	VPS28	-0.354681	4.53305	0.450758	1	0.782042
	CFB	-0.143832	6.02373	0.801	1	0.905112
	CFP	-1.68403	4.3038	0.0067408	0.196769	0.311212
	RRP7A	0.210764	4.26497	0.681554	1	1.1573
	NUP85	-0.0800749	5.1762	0.881592	1	0.946009
	VPS11	-0.310735	5.07332	0.482289	1	0.806231
	ST3GAL4	0.2287	4.35713	0.654767	1	1.17178
	RRS1	0.221617	4.09948	0.691877	1	1.16604
	ST3GAL5	-0.184909	4.53814	0.810673	1	0.879705
	ST3GAL6	0.360393	4.83381	0.40902	1	1.28378
	NUP88	-0.161104	4.00353	0.782078	1	0.89434
	ST3GAL1	-0.449248	4.99688	0.317505	1	0.732425
	ST3GAL2	0.565958	3.44406	0.427567	1	1.48037
	VPS16	0.260968	4.21526	0.656144	1	1.19828
	ST3GAL3	-0.0991002	3.68929	0.902871	1	0.933615
	PLK4	1.60591	3.75048	0.0118553	0.277784	3.04388
	NFE2	1.65194	3.26899	0.0656809	0.688274	3.14256
	PLK3	1.31604	3.98335	0.0806312	0.750864	2.48983
	ARL14EP	0.159992	4.9845	0.72284	1	1.11728
	APOOL	0.207377	3.33336	0.762624	1	1.15459
	MCAM	-0.385461	5.82703	0.291712	1	0.765535
	PLK2	0.0370606	5.40664	0.936957	1	1.02602
	PLK1	-0.444059	2.14589	0.675661	1	0.735064
	MCAT	0.335352	3.43253	0.617881	1	1.26169
	GTF2IRD1	-0.423949	5.05017	0.327496	1	0.745382
	LOC110078097	0.0642461	3.17062	1	1	1.04554
	LOC110078098	1.5076	1.06588	0.705912	1	2.84337
	LOC110078099	-0.221187	1.92482	0.922731	1	0.857859
	BPIFC	-1.7538	0.752711	1	1	0.29652
	LOC110078089	-0.916052	2.58609	0.398367	1	0.529957
	MOCS2	0.370555	2.27928	0.771894	1	1.29285
	MOCS3	-0.472288	3.17348	0.551531	1	0.72082
	STON1	0.0286514	6.95599	0.92482	1	1.02006
	CHM	0.268867	4.40532	0.628385	1	1.20486
	STON2	-0.134833	5.57689	0.733919	1	0.910775
	MCEE	-0.135219	2.05912	1	1	0.910532
	LOC110078081	-0.401727	1.30675	1	1	0.756952
	ELOA	-0.230326	5.30649	0.547853	1	0.852442
	ELOB	-0.0674735	5.58727	0.849579	1	0.954308
	RRP12	0.437682	4.53532	0.347781	1	1.35443
	ELOC	-0.00464898	3.78963	1	1	0.996783
	CIC	-0.591708	5.50386	0.11402	0.838967	0.663557
	RRP15	-0.342986	4.11034	0.543228	1	0.788408
	LOC110078087	0.0786258	1.07846	1	1	1.05601
	EDARADD	0.643256	3.00386	0.431525	1	1.56185
	LOC110078079	-1.7538	0.752711	1	1	0.29652
	RPS6KL1	1.54789	2.74064	0.145589	0.91121	2.92389
	EXOC8	-0.665269	5.28781	0.0640637	0.682312	0.630571
	PLLP	-1.21801	4.10633	0.0478862	0.596605	0.429875
	EXOC7	-0.186696	6.02428	0.59192	1	0.878615
	CIT	0.763321	4.27231	0.162526	0.935043	1.69739
	EXOC4	0.423635	5.19906	0.266668	1	1.3413
	LOC110078071	-0.411798	5.54845	0.241033	1	0.751686
	EXOC3	-0.260399	5.72421	0.478273	1	0.834857
	PLIN2	-0.403675	6.02596	0.285378	1	0.75593
	EXOC6	0.0424143	6.00499	0.894879	1	1.02984
	EXOC5	-0.350792	6.62012	0.242614	1	0.784153
	PLIN1	2.63246	0.869357	0.56362	1	6.20084
	RCCD1	-0.499164	2.44321	0.736584	1	0.707517
	MOCS1	-0.273801	4.04277	0.655001	1	0.827137
	EXOC2	-0.388676	6.02774	0.264608	1	0.76383
	LOC110078077	-0.269815	3.47182	0.772788	1	0.829426
	LOC110078067	4.99652	1.64719	0.0186105	0.357518	31.9228
	NFIX	-0.0391726	10.3845	0.90822	1	0.973213
	PRUNE2	0.552574	3.51074	0.388693	1	1.4667
	PRUNE1	0.240453	3.20765	0.754055	1	1.18136
	LOC110080384	0.111493	7.04194	0.709402	1	1.08035
	METTL21A	-0.165928	3.19025	0.871087	1	0.891355
	RASSF10	-0.112062	4.08057	0.889752	1	0.925264
	MINOS1	-0.74444	4.80959	0.104308	0.813983	0.596899
	RRP36	0.135743	4.50063	0.767134	1	1.09866
	LOC110079390	1.86334	0.763335	1	1	3.63849
	CKB	1.13041	7.41148	0.0502998	0.611545	2.18921
	PAIP2	-0.177195	5.7712	0.64118	1	0.884421
	LOC110079396	1.88263	2.97126	0.0386154	0.534206	3.68745
	PAIP1	0.00900478	6.60536	0.978562	1	1.00626
	LOC110078056	0.144724	5.04068	0.731025	1	1.10552
	HIPK4	-2.77247	0.88053	0.56362	1	0.146354
	BCHE	-0.306353	2.90894	0.70175	1	0.808683
	CKM	-1.5026	3.96577	0.163951	0.935508	0.352916
	MOCOS	-1.47323	3.58678	0.0697616	0.706703	0.360175
	RFLNB	-0.297286	4.38624	0.628621	1	0.813782
	G0S2	0.502361	4.21526	0.332204	1	1.41653
	ELP2	0.161536	4.31164	0.73668	1	1.11848
	ELP3	0.392566	3.70313	0.556897	1	1.31273
	RRP1B	0.336597	5.67752	0.455159	1	1.26277
	ELP4	-0.215984	4.87586	0.673081	1	0.860959
	HIPK1	-0.219386	8.50683	0.464633	1	0.858931
	ELP5	-0.15227	2.84412	0.927483	1	0.899834
	ELP6	0.966033	3.34396	0.177634	0.956679	1.95346
	HIPK3	-0.201708	7.7245	0.488706	1	0.869521
	RFLNA	-1.01342	4.56213	0.0757793	0.732711	0.495369
	HIPK2	0.205414	6.66705	0.617291	1	1.15302
	NFIA	-0.527175	9.86172	0.118714	0.856506	0.693912
	NFIB	-0.893675	9.17643	0.00591405	0.180544	0.538241
	NFIC	0.0411863	5.74904	0.957896	1	1.02896
	FOSB	2.13795	2.33534	0.0828219	0.756977	4.40135
	LOC110078051	2.09146	1.31291	0.368884	1	4.2618
	PLP2	-0.13069	7.29324	0.714687	1	0.913394
	TMEM229B	1.44301	3.0547	0.0728472	0.719775	2.71888
	LOC110080366	1.53968	2.27467	0.268576	1	2.90729
	FAM49A	-0.128941	6.04034	0.761479	1	0.914503
	FAM49B	0.65982	5.72766	0.101911	0.808571	1.57989
	CLU	0.526277	5.49967	0.174217	0.951052	1.44021
	LCLAT1	0.192436	6.0846	0.544041	1	1.14269
	LOC110080361	0.00878698	3.34191	1	1	1.00611
	LOC110080360	1.86334	0.763335	1	1	3.63849
	THG1L	-0.269102	4.3083	0.611695	1	0.829836
	CFL2	-0.0855493	6.31079	0.834942	1	0.942426
	CFL1	0.0813158	8.6523	0.79332	1	1.05798
	PLS3	0.222053	8.33019	0.485806	1	1.16639
	OIP5	0.576232	2.04718	0.649675	1	1.49095
	LOC110078043	-0.575544	5.3458	0.187927	0.973734	0.671033
	PLS1	-2.27622	1.40817	0.286363	1	0.206438
	IL13RA1	-0.118069	5.54032	0.800018	1	0.92142
	KCMF1	-0.154983	5.90961	0.64654	1	0.898143
	LOC110078034	0.884643	0.959062	1	1	1.84631
	COL27A1	0.574896	4.53711	0.272968	1	1.48957
	FKBPL	-0.724631	2.11049	0.634887	1	0.605152
	DIO1	-0.23129	1.43432	1	1	0.851873
	DIO2	-1.10417	8.95758	0.030661	0.477296	0.465168
	DIO3	2.39548	3.16068	0.00185403	0.0768973	5.26152
	FAM91A1	0.10958	6.5504	0.727793	1	1.07891
	LEMD3	0.074389	6.87409	0.805737	1	1.05291
	LEMD2	0.157697	5.89921	0.62652	1	1.1155
	LEMD1	-2.05439	1.57095	0.18651	0.970876	0.24075
	LOC110081680	1.85966	0.763021	1	1	3.62922
	TOM1L1	-0.603031	4.65584	0.257334	1	0.658369
	TOM1L2	-0.244031	5.79902	0.507461	1	0.844383
	OBSCN	-1.6786	3.19539	0.136977	0.894768	0.312385
	FKBP8	-0.0590972	4.63314	0.931768	1	0.959865
	FKBP7	-0.122168	5.91439	0.762651	1	0.918806
	FKBP9	-0.263666	8.03775	0.394808	1	0.832969
	FKBP4	-0.346237	5.84139	0.356939	1	0.786633
	FKBP3	0.513891	3.37706	0.559269	1	1.4279
	FKBP6	-1.57222	1.50581	0.534724	1	0.336291
	LOC110078032	0.524768	2.38777	0.767734	1	1.4387
	FKBP5	0.458684	10.8924	0.180138	0.960035	1.37429
	LOC110078023	-0.290806	2.89475	0.736732	1	0.817445
	LOC110081674	-2.46988	0.84926	1	1	0.180506
	LOC110080342	-2.12971	1.28823	0.33228	1	0.228504
	FKBP2	-0.121111	3.55862	0.845954	1	0.919479
	LOC110079359	3.76981	1.14755	0.197399	0.984534	13.6404
	LOC110079358	3.49258	1.06075	0.22527	0.991417	11.2556
	LOC110080346	-2.04338	0.776356	1	1	0.242595
	LOC110081670	1.46203	2.2783	0.204775	0.989785	2.75495
	TRNAV-UAC	0.0211075	1.71664	1	1	1.01474
	LOC110080339	1.36396	1.56769	0.43399	1	2.57391
	LOC110080338	-1.08806	0.99467	0.705912	1	0.470394
	PLTP	0.0353342	5.0921	0.954527	1	1.02479
	MCL1	-0.229369	7.76597	0.458549	1	0.853008
	LOC110080333	-0.415732	5.42073	0.239667	1	0.749639
	LOC110081664	-0.332899	2.8487	0.810844	1	0.79394
	LOC110081663	-3.93274	1.20312	0.141613	0.899914	0.0654827
	LOC110081662	0.340209	2.33508	0.84093	1	1.26594
	LOC110078019	-4.20482	1.37252	0.143847	0.905676	0.0542278
	LOC110081665	-3.30395	0.984784	0.345431	1	0.101254
	LOC110082995	1.80996	1.23456	0.551034	1	3.50634
	BCL9	-0.429133	5.80553	0.232318	1	0.742708
	UBOX5	0.894598	3.20083	0.305498	1	1.85909
	BCL6	1.52441	3.22259	0.0454676	0.579327	2.87669
	CPD	-0.579333	6.42032	0.0973123	0.802678	0.669273
	BCL3	0.363035	4.20525	0.683585	1	1.28613
	BCL2	-0.394089	6.56284	0.281989	1	0.76097
	CPE	-0.194056	5.46193	0.695396	1	0.874145
	LOC110080327	-1.7538	0.752711	1	1	0.29652
	LOC110082989	-0.0433684	1.24552	1	1	0.970387
	PGPEP1L	0.665278	0.988656	1	1	1.58587
	OSCP1	0.869499	3.86491	0.125868	0.868744	1.82703
	SLC48A1	-0.323731	6.57577	0.316685	1	0.799001
	CPM	-1.34843	2.98374	0.176102	0.953839	0.392719
	LOC110079332	-3.58854	1.06735	0.22527	0.991417	0.0831269
	LOC110081652	0.162579	1.04158	1	1	1.11929
	LOC110082987	-0.675607	2.46871	0.51726	1	0.626069
	LOC110081650	0.531713	5.34046	0.179624	0.958575	1.44564
	LOC110082988	-0.0126294	3.57044	1	1	0.991284
	MCM7	-0.525747	3.53462	0.456084	1	0.6946
	CPQ	-3.79211	1.13736	0.125545	0.868744	0.0721875
	COL14A1	0.27522	6.37229	0.418218	1	1.21018
	MCM8	0.565368	2.28114	0.683927	1	1.47977
	ZC3H4	-0.0868481	5.42186	0.823862	1	0.941578
	MCM9	0.623049	4.81884	0.144298	0.907432	1.54013
	ZC3H3	-0.318612	3.43297	0.687709	1	0.801841
	LOC110081654	0.00966482	1.38674	1	1	1.00672
	ZC3H6	-0.192768	6.66929	0.555892	1	0.874925
	CPZ	-0.394295	5.59787	0.282668	1	0.760861
	KBTBD13	0.189179	1.33719	1	1	1.14011
	KBTBD12	-1.169	1.91211	0.34317	1	0.444731
	VPS72	0.03557	3.93193	1	1	1.02496
	CEP170B	0.328762	6.13353	0.444805	1	1.25594
	EVI5L	-0.277046	7.10919	0.363476	1	0.825279
	OIT3	3.13502	0.969187	0.345431	1	8.78489
	LOC110079322	-1.44303	3.66311	0.0301916	0.472746	0.367794
	CR1	0.447603	4.91761	0.272989	1	1.36377
	GGPS1	-0.812387	3.2325	0.271174	1	0.569439
	SGIP1	-1.29223	3.19547	0.0594926	0.66339	0.408319
	DIS3	-0.334971	6.53735	0.322208	1	0.7928
	LOC110081644	-0.502502	3.91932	0.360538	1	0.705882
	LOC110079329	-2.04338	0.776356	1	1	0.242595
	APOA1	0.0242823	1.73958	1	1	1.01697
	LOC110070989	1.49179	1.60302	0.562047	1	2.81238
	LOC110070996	-1.52596	2.7977	0.0879426	0.776253	0.347249
	LOC110070995	-0.92627	3.20769	0.237104	1	0.526217
	LOC110070998	-0.404516	2.55061	0.781832	1	0.75549
	LOC110070997	-2.33844	1.80196	0.0993811	0.805496	0.197724
	SAPCD2	-2.19607	1.19871	0.353148	1	0.218231
	SAPCD1	1.95112	0.770582	1	1	3.86674
	LOC110070991	-0.912812	0.979272	1	1	0.531149
	LOC110070994	2.63844	0.869973	0.56362	1	6.22658
	LOC110080308	-0.80916	6.91359	0.0459833	0.583425	0.570714
	MCM3	0.363564	4.86575	0.392511	1	1.2866
	MCM4	-0.137382	5.61713	0.742253	1	0.909168
	MCM5	-0.0192774	4.56325	0.969509	1	0.986727
	MCM6	0.231918	5.32969	0.539626	1	1.1744
	LOC110080305	-0.902787	1.50004	0.774356	1	0.534853
	LOC110082967	1.86334	0.763335	1	1	3.63849
	CRK	0.360015	5.86819	0.289875	1	1.28344
	LOC110079320	0.0175981	2.98718	1	1	1.01227
	MCM2	0.206128	5.33702	0.593232	1	1.15359
	LOC110080309	-0.0350074	4.07379	0.958206	1	0.976027
	HDAC4	0.208527	8.1554	0.472582	1	1.15551
	CEBPA	-4.40251	1.32865	0.103321	0.81154	0.0472838
	LOC110082964	2.78573	0.884268	0.56362	1	6.89586
	HDAC5	-0.0583039	7.32937	0.844756	1	0.960393
	CEBPB	1.77716	4.9863	0.00384648	0.131436	3.42752
	HDAC2	0.00749856	6.6228	0.979073	1	1.00521
	LOC110079313	-1.94288	0.768694	1	1	0.260096
	HDAC3	0.00321886	5.38184	1	1	1.00223
	CEBPD	1.0307	7.3715	0.00142183	0.0637893	2.04302
	CEBPE	5.83142	2.14413	0.00300691	0.109597	56.9418
	HDAC1	-0.27433	5.39206	0.46232	1	0.826834
	LOC110081633	-0.609484	6.68275	0.11188	0.83514	0.655431
	VPS4B	-0.0308083	6.98295	0.944031	1	0.978872
	VPS4A	-0.259725	4.87562	0.554955	1	0.835247
	CEBPG	0.136551	6.89982	0.655197	1	1.09927
	TULP4	0.0665702	6.49774	0.850685	1	1.04722
	TULP3	-0.299239	4.88681	0.498326	1	0.812681
	TULP2	0.487264	1.32904	1	1	1.40178
	TULP1	0.661174	2.07617	0.598962	1	1.58137
	LOC110069992	1.27475	2.92817	0.194068	0.983146	2.41957
	HDAC8	0.505437	3.28085	0.595919	1	1.41955
	LOC110070978	0.0890496	4.19534	0.932042	1	1.06367
	LOC110069991	0.497938	4.28367	0.38555	1	1.41219
	HDAC9	-0.337761	4.17957	0.653925	1	0.791268
	LOC110070977	0.878667	0.958459	1	1	1.83868
	HDAC6	0.428761	4.8302	0.338751	1	1.34608
	LOC110069990	0.147221	2.6523	0.914512	1	1.10743
	HDAC7	0.534278	6.20054	0.101211	0.807413	1.44822
	LOC110070979	3.12998	0.968583	0.345431	1	8.75425
	LOC110070985	-4.33649	1.43208	0.113425	0.836978	0.049498
	STOX2	-0.0504673	6.49101	0.901526	1	0.965624
	NFS1	-0.0134534	5.02269	1	1	0.990718
	LOC110070986	5.18854	1.69207	0.0160111	0.326174	36.4675
	HECTD1	0.168124	8.53873	0.56865	1	1.1236
	VPS51	-0.164216	4.99974	0.690626	1	0.892413
	HECTD2	-0.026865	6.05561	0.956148	1	0.981551
	VPS50	-0.293703	5.78441	0.414503	1	0.815805
	LOC110070980	0.724755	2.40805	0.466618	1	1.65262
	HECTD3	0.102542	4.95676	0.845751	1	1.07366
	HECTD4	-0.531664	5.57801	0.139129	0.895847	0.691756
	LOC110070983	1.00781	2.78365	0.220172	0.991417	2.01086
	SVBP	0.25409	4.05353	0.729372	1	1.19258
	VPS53	0.0687596	5.08451	0.92993	1	1.04881
	VPS52	-0.627247	5.03055	0.171835	0.946941	0.64741
	XIRP2	-0.630213	4.47976	0.2747	1	0.646081
	VPS54	-0.0708293	6.26174	0.830573	1	0.952091
	CSK	0.208374	4.15945	0.795663	1	1.15539
	LOC110081625	2.78573	0.884268	0.56362	1	6.89586
	BCO2	-0.0119927	3.15117	1	1	0.991722
	BCO1	-1.81163	2.5448	0.0409269	0.550226	0.284869
	STOX1	-0.907591	6.14998	0.00888641	0.231689	0.533074
	SLC35A2	-0.0565832	4.5493	0.937266	1	0.961539
	SLC35A1	-0.569665	5.10201	0.221865	0.991417	0.673773
	MGME1	-0.87342	2.20541	0.398858	1	0.545851
	SLC35A4	0.415814	6.85442	0.184451	0.968819	1.33405
	SLC35A3	-1.80854	4.61309	0.00974394	0.244605	0.285479
	LOC110081624	-2.08118	1.61778	0.157796	0.92735	0.236321
	LOC110079303	-2.04338	0.776356	1	1	0.242595
	LOC110079309	-1.7538	0.752711	1	1	0.29652
	LOC110070967	-1.06834	2.93436	0.227133	0.996336	0.476868
	LOC110069981	0.569482	2.28156	0.605248	1	1.48399
	LOC110070966	1.52459	2.84678	0.112411	0.835784	2.87704
	KBTBD11	-1.2001	5.29594	0.00553176	0.171466	0.435245
	LOC110070969	-1.20058	2.7676	0.178525	0.958311	0.435102
	CPPED1	-0.301193	5.30095	0.481713	1	0.811581
	LOC110070968	0.0415834	5.04923	0.947621	1	1.02924
	LOC110069985	1.46787	1.16082	0.501018	1	2.76613
	ASXL1	0.070536	5.79172	0.859655	1	1.05011
	MAB21L3	0.530546	1.85167	0.909253	1	1.44448
	LOC110069984	-0.509786	3.74959	0.426111	1	0.702326
	LOC110070973	-0.0445382	2.12992	1	1	0.9696
	LOC110069983	-1.36305	1.95793	0.300487	1	0.388759
	LOC110070976	-1.7538	0.752711	1	1	0.29652
	EVI2A	2.59092	2.28478	0.0294221	0.466226	6.02483
	LOC110070975	0.699108	2.47145	0.65524	1	1.6235
	LOC110070970	-2.9514	0.895773	0.345431	1	0.129283
	ASXL3	0.953992	7.25047	0.00343481	0.121511	1.93723
	MAB21L1	-0.841506	4.29257	0.165131	0.935508	0.558061
	APOC2	-1.44061	1.07729	0.705912	1	0.368413
	LOC110070972	-0.00287239	3.16691	1	1	0.998011
	MAB21L2	-0.471624	5.81387	0.169682	0.944287	0.721152
	LOC110070971	-0.971265	2.20882	0.495204	1	0.510058
	ASXL2	0.362239	3.82659	0.530034	1	1.28542
	VPS41	-0.0527221	7.14683	0.879316	1	0.964115
	CEBPZ	0.585155	6.01559	0.0962909	0.801559	1.5002
	BCOR	0.559093	6.21081	0.125648	0.868744	1.47334
	VPS45	-0.689734	4.36409	0.165638	0.93623	0.619968
	EVI2B	2.88315	2.86634	0.00145723	0.0647568	7.37757
	LOC110081619	3.84916	1.96881	0.0281721	0.455749	14.4116
	LOC110081618	0.957466	6.27727	0.00547599	0.17088	1.9419
	LOC110079410	0.13964	8.30079	0.653668	1	1.10163
	SLC35B3	-0.137126	5.12091	0.736157	1	0.909329
	SLC35B2	0.141771	5.39096	0.725955	1	1.10326
	SLC35B4	0.728936	3.84015	0.210711	0.991417	1.65742
	LOC110079411	0.399156	4.0458	0.621497	1	1.31874
	MISP3	3.04839	1.77191	0.154278	0.917843	8.27287
	SLC35B1	0.276388	4.75667	0.515656	1	1.21116
	IL23R	2.63844	0.869973	0.56362	1	6.22658
	LOC110079417	-1.94288	0.768694	1	1	0.260096
	NFU1	-0.544709	5.932	0.102167	0.808819	0.68553
	RPS6KA4	-0.116568	6.34887	0.708221	1	0.922379
	RPS6KA3	0.556081	6.86854	0.0741579	0.727111	1.47027
	RPS6KA6	-0.24558	5.79167	0.495672	1	0.843477
	RPS6KA5	-0.425635	6.35632	0.211014	0.991417	0.744511
	CUNHXorf36	-0.126973	5.27025	0.837102	1	0.915751
	NIPAL1	-2.93508	1.69061	0.0896986	0.780677	0.130753
	CUNHXorf38	-0.00858139	4.23886	1	1	0.994069
	RPS6KA2	-2.12736	2.53184	0.0520503	0.622327	0.228876
	NIPAL2	0.016536	5.02866	1	1	1.01153
	RPS6KA1	0.452676	5.94765	0.205934	0.991348	1.36858
	NIPAL3	-0.616559	3.40693	0.386485	1	0.652225
	ARFIP2	-0.33252	4.18487	0.546593	1	0.794148
	GSC2	3.49258	1.06075	0.22527	0.991417	11.2556
	ARFIP1	0.252718	6.26019	0.419505	1	1.19145
	LOC110081725	0.0462904	5.08328	0.956514	1	1.03261
	SLC35A5	-0.111181	4.46516	0.815587	1	0.92583
	TANGO6	0.81496	3.08703	0.262081	1	1.75925
	LOC110081722	-0.27612	3.03441	0.824195	1	0.825809
	SLC35C2	-1.86396	2.45977	0.0609785	0.669372	0.274721
	TANGO2	0.858793	3.35849	0.269257	1	1.81352
	SLC35C1	-0.0763318	4.63464	0.89299	1	0.948466
	TWSG1	0.120106	7.13347	0.782314	1	1.08681
	LOC110081716	-0.933393	1.47816	0.684706	1	0.523625
	LOC110081715	-0.534535	1.16359	1	1	0.690381
	GSAP	-0.168757	5.96482	0.606367	1	0.889609
	LOC110081713	-0.881576	4.67305	0.0684638	0.698216	0.542774
	OBSL1	-0.313833	2.24782	0.81681	1	0.804501
	SLC22A3	-0.789281	4.99476	0.114397	0.840819	0.578633
	SLC22A5	-1.55989	4.25253	0.00470613	0.15339	0.339178
	SLC35D1	0.469517	5.89244	0.209193	0.991417	1.38465
	SLC35D2	-1.33051	3.1833	0.0917817	0.784335	0.397627
	GSE1	-0.758165	6.90923	0.0215148	0.3913	0.591248
	LOC110081703	-0.892974	4.33244	0.100498	0.806326	0.538503
	FAM43A	-0.122391	1.23791	1	1	0.918664
	FAM43B	2.63246	0.869357	0.56362	1	6.20084
	LOC110081709	-0.0243898	4.20806	0.962265	1	0.983236
	ARGLU1	-0.444674	7.1842	0.16676	0.938454	0.73475
	LOC110081706	-1.0644	6.63712	0.00164939	0.0704574	0.478172
	XCR1	2.29019	1.93257	0.230571	1	4.89121
	SLC35E1	-0.14512	4.17914	0.764224	1	0.904304
	SLC35E4	-0.18327	2.33869	1	1	0.880705
	SLC35E3	0.657419	5.11891	0.149936	0.91773	1.57726
	SH2D1B	3.76981	1.14755	0.197399	0.984534	13.6404
	CUNHXorf23	0.46347	5.12277	0.2409	1	1.37885
	MPHOSPH10	0.27357	4.25205	0.596397	1	1.2088
	TECPR2	0.0598204	5.94136	0.872185	1	1.04234
	TECPR1	-0.286392	3.38323	0.674173	1	0.81995
	CUNHXorf21	1.62426	2.23236	0.119188	0.857753	3.08285
	SLC35F6	-0.171553	2.69047	0.916097	1	0.887886
	FAM45A	0.521717	4.58038	0.329702	1	1.43566
	SLC35F3	0.646136	2.84277	0.494842	1	1.56497
	SLC35F2	-1.26676	4.09784	0.0189413	0.360496	0.415591
	SLC35F5	-0.580791	6.64724	0.0615135	0.671203	0.668597
	MCUB	-0.0151363	5.54267	1	1	0.989563
	SLC35F1	-0.166511	5.55538	0.7547	1	0.890995
	RSF1	-0.0630173	6.07873	0.871566	1	0.95726
	SIPA1L2	0.0826064	6.58841	0.772032	1	1.05893
	SIPA1L3	-0.263667	5.40291	0.566369	1	0.832968
	SIPA1L1	-0.168721	6.77026	0.580622	1	0.889631
	GSG2	0.142094	3.6954	0.825028	1	1.10351
	GSG1	1.09495	2.27415	0.420952	1	2.13605
	SLC35G2	-0.222493	1.07962	1	1	0.857083
	SLC35G1	0.413592	2.0982	0.833162	1	1.332
	TYK2	-0.0460028	5.53067	0.92536	1	0.968616
	MTSS1	0.274501	6.48309	0.439822	1	1.20958
	NFX1	0.0104391	6.98569	0.98317	1	1.00726
	C1QTNF12	-0.898754	4.04307	0.100472	0.806326	0.53635
	AMER1	-0.0344823	5.18193	0.934752	1	0.976382
	AMER2	0.99316	3.63768	0.0928509	0.787898	1.99054
	AMER3	-3.8507	1.1447	0.149562	0.91773	0.0693146
	MEGF6	-0.419383	6.82957	0.315181	1	0.747744
	TYMS	0.802667	3.04127	0.302301	1	1.74432
	RGPD4	0.0838795	6.96415	0.781332	1	1.05986
	TYMP	-0.0686656	1.06456	1	1	0.95352
	EMC1	-0.0455847	5.4447	0.901624	1	0.968897
	EMC2	-0.196866	5.48365	0.605571	1	0.872444
	SUSD4	-2.10527	1.60416	0.214254	0.991417	0.232407
	EMC3	-0.125846	5.02406	0.753142	1	0.916466
	EMC4	-0.503371	3.92735	0.351018	1	0.705456
	SUSD3	0.574282	1.80459	0.73804	1	1.48894
	SUSD6	0.0146157	6.10646	0.986302	1	1.01018
	FAM47E	-0.821352	0.986633	1	1	0.565912
	EMC6	0.463396	4.59251	0.329935	1	1.37878
	SUSD5	-0.975246	1.75012	0.459776	1	0.508653
	EMC7	-0.233174	5.93831	0.573978	1	0.850761
	EMC8	-0.0434652	6.78561	0.909496	1	0.970322
	EMC9	-0.0276352	3.54192	1	1	0.981027
	SVIL	-0.420314	8.22424	0.158263	0.927596	0.747262
	NFYA	-0.181734	5.78405	0.605384	1	0.881643
	FAM46C	1.55763	3.62005	0.0214511	0.390929	2.94369
	NFYB	0.36407	5.09013	0.403241	1	1.28705
	NFYC	-0.352864	5.98885	0.276196	1	0.783028
	SUSD2	-2.04338	0.776356	1	1	0.242595
	SUSD1	0.916447	3.99269	0.104879	0.814126	1.88746
	FAM46A	0.216669	6.19467	0.500242	1	1.16205
	RSG1	-1.27758	2.94993	0.220848	0.991417	0.412488
	SVIP	-0.161773	4.6886	0.753046	1	0.893926
	SPCS3	-0.174564	3.99855	0.795382	1	0.886035
	SPCS2	0.0325921	5.66876	0.945675	1	1.02285
	SPCS1	-0.267452	5.40957	0.486404	1	0.830786
	LRRN4CL	0.816724	3.91511	0.171837	0.946941	1.7614
	LOC110091018	2.02211	2.55835	0.0400008	0.543445	4.06177
	QPCT	0.738953	5.63208	0.0453634	0.578816	1.66896
	NUPL2	0.618236	3.89255	0.300095	1	1.535
	MEGF8	-0.245588	6.17244	0.488029	1	0.843472
	SIPA1	0.783959	3.51829	0.19301	0.981023	1.72185
	LOC110091010	0.654281	3.78435	0.316865	1	1.57383
	MEGF9	-0.513956	4.44189	0.357104	1	0.700299
	SPPL2B	-0.337879	3.93353	0.507318	1	0.791204
	PMCH	2.63844	0.869973	0.56362	1	6.22658
	SPPL2A	0.1111	6.72641	0.706405	1	1.08005
	ROGDI	-0.41915	2.38417	0.784615	1	0.747865
	LOC110091023	-4.93621	1.63973	0.0163216	0.327923	0.0326626
	LOC110091022	-3.12969	0.961579	0.345431	1	0.114253
	PAIP2B	-0.11932	5.18401	0.776092	1	0.920621
	LOC110091024	0.376514	2.11827	0.771242	1	1.2982
	EME1	-0.0445183	3.13959	1	1	0.969614
	LOC110091029	0.905076	1.66533	0.535509	1	1.87264
	FPGT	0.0477226	4.15266	0.967783	1	1.03363
	FPGS	0.503573	3.94591	0.468558	1	1.41772
	LOC110091020	-0.288252	6.77997	0.37136	1	0.818894
	POSTN	-0.431192	10.8998	0.274701	1	0.741649
	TRPC4AP	0.04321	7.47843	0.883897	1	1.0304
	EMCN	-0.500832	6.15525	0.250085	1	0.706699
	LOC110091038	0.336915	1.15907	1	1	1.26305
	LOC110091037	1.86334	0.763335	1	1	3.63849
	SPECC1L	0.183952	6.74041	0.583261	1	1.13599
	TIMELESS	0.450903	4.36232	0.376531	1	1.3669
	MYADM	0.127753	9.65118	0.700941	1	1.09259
	LOC110091031	0.51217	2.93555	0.533599	1	1.42619
	PMEL	4.26839	1.31353	0.0912253	0.783259	19.2715
	ISYNA1	0.408293	1.80208	0.901285	1	1.32711
	GSTCD	0.0198487	4.22308	1	1	1.01385
	CLEC16A	0.122488	4.40597	0.825244	1	1.08861
	PMF1	0.600897	1.84564	0.772529	1	1.51666
	CAMSAP1	0.0241575	5.99517	0.984932	1	1.01689
	CAMSAP2	0.241613	6.08621	0.466783	1	1.18231
	EMG1	-0.582745	3.6724	0.379412	1	0.667692
	LOC110091047	-0.189216	2.07659	1	1	0.877082
	NPC1L1	-0.81465	1.34919	0.830577	1	0.568546
	TASP1	0.137494	5.60434	0.712301	1	1.09999
	AMELX	-2.14522	6.3521	0.255782	1	0.22606
	LOC110091042	0.181431	5.28301	0.710399	1	1.13401
	PNPT1	0.614532	6.07434	0.0645757	0.685328	1.53106
	CAMSAP3	-0.54139	4.37945	0.354645	1	0.687109
	DIAPH1	0.436255	6.99536	0.151583	0.91773	1.35309
	DAP	-0.380903	6.93803	0.203895	0.988626	0.767957
	DIAPH2	-0.252862	7.9645	0.427384	1	0.83923
	DIAPH3	0.702624	4.66162	0.161586	0.932313	1.62746
	DAO	1.28134	1.09543	0.705912	1	2.43064
	PXMP2	0.329275	2.78304	0.817973	1	1.25638
	PXMP4	1.1698	2.57072	0.198848	0.984534	2.24981
	SKIV2L	-0.631471	4.12442	0.283273	1	0.645518
	LOC110091050	1.97641	1.49912	0.290629	1	3.93512
	COLGALT2	-2.01198	2.50182	0.0302392	0.472746	0.247932
	DBI	-0.639614	6.47802	0.0610252	0.669372	0.641885
	CLEC14A	0.277089	3.24551	0.795483	1	1.21175
	DBH	1.44433	1.05895	0.705912	1	2.72136
	LOC110091069	-2.2953	1.81108	0.239422	1	0.203726
	DBP	-0.423869	3.7489	0.547136	1	0.745423
	LOC110091068	-1.94288	0.768694	1	1	0.260096
	NTMT1	-0.0956563	2.46033	1	1	0.935846
	DBT	0.0253463	5.88601	0.953816	1	1.01772
	COLGALT1	0.298559	5.24234	0.430761	1	1.22992
	LOC110091064	-1.94288	0.768694	1	1	0.260096
	STPG4	-1.94288	0.768694	1	1	0.260096
	OXSR1	-0.335347	5.95816	0.302523	1	0.792594
	DCK	0.569453	4.46257	0.289896	1	1.48396
	DCN	-0.345609	11.8164	0.32284	1	0.786976
	CFAP221	-0.190339	1.85541	0.911477	1	0.8764
	DCX	-1.4821	4.68343	0.00193039	0.0795163	0.357967
	DNASE2	0.801854	5.30871	0.0575335	0.652843	1.74334
	DTHD1	0.0433362	2.0979	1	1	1.03049
	DDC	0.0211075	1.71664	1	1	1.01474
	CFAP206	0.358304	4.00416	0.603689	1	1.28192
	DDO	0.51552	3.17916	0.462788	1	1.42951
	LOC110091089	3.83534	2.01228	0.0472851	0.591211	14.2742
	LOC110091088	0.74235	0.996047	1	1	1.6729
	PDE11A	2.39091	1.39975	0.180173	0.960035	5.24489
	RPS6KC1	-0.153175	5.72993	0.719116	1	0.899269
	TYW1	0.465414	4.89591	0.257633	1	1.38071
	LOC110091081	0.287779	1.67194	1	1	1.22076
	PDSS2	0.362815	4.21921	0.501033	1	1.28593
	LOC110091080	0.0999028	4.32833	0.855263	1	1.0717
	LOC110091083	-0.659593	7.12434	0.0358589	0.517573	0.633057
	PDSS1	0.61012	3.56979	0.443379	1	1.52639
	LOC110091085	0.842847	0.988483	1	1	1.79359
	LOC110091084	-1.8417	3.04006	0.0764223	0.733021	0.278993
	LOC110091087	-0.830734	2.41066	0.540181	1	0.562243
	LOC110091086	0.534419	2.31593	0.613448	1	1.44836
	ATP13A1	0.13655	5.53357	0.740428	1	1.09927
	LOC110091090	2.25637	1.62588	0.148256	0.916748	4.77789
	DEK	0.097082	8.02296	0.753861	1	1.06961
	DES	-1.52976	5.13988	0.00473551	0.15339	0.346336
	PDE10A	0.221636	4.33017	0.751477	1	1.16605
	RPS6KB1	-0.0451857	5.59218	0.905094	1	0.969165
	RPS6KB2	-0.915229	3.7373	0.134992	0.892587	0.53026
	ATP13A4	-0.254614	2.44096	0.813332	1	0.838212
	LOC110091091	-0.582621	1.99209	0.66646	1	0.66775
	ATP13A2	0.272886	4.95888	0.686452	1	1.20822
	LOC110091094	0.0899682	1.64322	1	1	1.06435
	LOC110091093	-0.354558	1.33694	1	1	0.782109
	ATP13A3	0.0391895	4.05402	1	1	1.02754
	MDC1	0.619281	4.21276	0.243965	1	1.53611
	SCAMP5	0.310577	5.34027	0.441041	1	1.2402
	LACTB	-0.207625	5.16947	0.622234	1	0.865962
	SCAMP4	-0.0773345	4.09522	0.925977	1	0.947807
	IGLON5	-0.59516	1.88833	0.746091	1	0.661971
	CUNH9orf64	0.387813	3.52443	0.574872	1	1.30841
	TYW5	-0.17675	3.67081	0.807465	1	0.884694
	TYW3	-0.340068	2.93856	0.780549	1	0.790004
	NGDN	-0.364874	3.65074	0.570049	1	0.776537
	SCAMP1	0.306482	6.51378	0.373536	1	1.23669
	EML1	0.305555	6.48996	0.426325	1	1.23589
	HSPG2	-0.175768	8.02772	0.617187	1	0.885296
	EML2	0.127131	4.23658	0.856415	1	1.09212
	SCAMP2	-0.651741	6.01041	0.066224	0.689051	0.636512
	EML3	0.25246	5.36145	0.54087	1	1.19124
	CUNH14orf119	-0.493599	2.9054	0.615643	1	0.710251
	EML4	0.0789668	7.57399	0.795473	1	1.05626
	EML5	-0.296672	5.14579	0.461497	1	0.814128
	EML6	-1.01142	3.20543	0.159514	0.928371	0.496056
	PRKAR1B	0.684022	2.0478	0.61425	1	1.60661
	PRKAR1A	0.0933608	8.54351	0.760169	1	1.06685
	RBCK1	0.127355	3.9334	0.922562	1	1.09229
	NGEF	-0.667943	4.95563	0.124548	0.867032	0.629404
	CGGBP1	-0.0223098	5.8268	0.984291	1	0.984655
	GRID2IP	1.86334	0.763335	1	1	3.63849
	DHH	0.221629	1.50391	1	1	1.16605
	SHOX2	-1.22783	4.63416	0.0161005	0.326389	0.426959
	AAAS	-0.085592	3.95186	0.88051	1	0.942398
	DYNC2LI1	-0.227511	4.24283	0.709245	1	0.854107
	C5	-1.66225	6.08397	0.00236984	0.0921482	0.315946
	GRIN2A	0.549351	2.60595	0.640744	1	1.46343
	HSPH1	0.844706	4.66516	0.1247	0.867032	1.7959
	C6	0.688212	4.0031	0.274849	1	1.61129
	C7	0.830035	7.09941	0.106136	0.817039	1.77773
	PRKAR2B	0.156202	3.68323	0.854754	1	1.11435
	C9	-1.06064	5.97784	0.123411	0.866626	0.479418
	PRKAR2A	-0.278022	6.96971	0.339238	1	0.824721
	CUNH9orf43	0.31667	1.67818	1	1	1.24545
	RSU1	0.174126	6.1444	0.611146	1	1.12828
	EXPH5	-0.939391	5.63841	0.0137806	0.302469	0.521453
	NGFR	-0.962972	4.35991	0.0656243	0.688274	0.512999
	PMM1	0.764318	4.72175	0.160927	0.930239	1.69857
	PMM2	-0.0320599	5.46028	0.943171	1	0.978023
	GRIN2C	-1.61964	1.40423	0.360428	1	0.325416
	GRIN2B	2.97383	2.14177	0.0521743	0.623397	7.85618
	GRIN2D	-1.52594	1.42364	0.442827	1	0.347254
	CS	-0.436152	7.08585	0.140218	0.898355	0.739103
	GRIN3B	-0.0795424	0.875246	1	1	0.946358
	LOC110079299	-0.115302	8.67264	0.747177	1	0.923189
	LAD1	-0.0819758	5.12269	0.880987	1	0.944763
	LRSAM1	-0.866396	4.31872	0.0696798	0.706271	0.548516
	LOC110080287	-0.251286	4.32237	0.618304	1	0.840147
	RPLP1	-0.278484	9.92535	0.384018	1	0.824457
	QPRT	1.31616	1.28898	0.512456	1	2.49003
	RPLP0	-0.146641	9.99771	0.650467	1	0.903351
	LOC110080280	0.105355	1.95886	1	1	1.07576
	ECSIT	-0.56644	5.05377	0.191949	0.979951	0.675281
	AACS	1.54873	2.51388	0.142868	0.903164	2.9256
	NIPBL	0.0526868	8.74416	0.862027	1	1.03719
	LOC110079290	-1.94288	0.768694	1	1	0.260096
	RPLP2	0.0320675	9.85049	0.923503	1	1.02248
	CUNH9orf24	2.63844	0.869973	0.56362	1	6.22658
	LOC110079295	-2.46988	0.84926	1	1	0.180506
	APPL2	0.201063	6.2405	0.551376	1	1.14954
	APPL1	-0.110259	6.8921	0.724574	1	0.926422
	LOC110080278	3.19308	0.975612	0.345431	1	9.14564
	LOC110080276	1.86334	0.763335	1	1	3.63849
	ACTL6A	-0.247884	4.59366	0.60822	1	0.842131
	NIPA1	-1.53089	2.92325	0.1358	0.893704	0.346064
	SIRT4	-1.53447	2.00573	0.236403	1	0.345207
	EMP1	-0.371855	8.44768	0.207155	0.991417	0.772788
	SIRT5	0.126708	5.86033	0.721526	1	1.0918
	SIRT6	-0.570556	3.07782	0.478378	1	0.673357
	EMP2	-0.220078	5.32941	0.567454	1	0.858519
	NIPA2	0.777137	4.82905	0.0909768	0.783259	1.71373
	EMP3	0.103924	7.9603	0.727232	1	1.07469
	SIRT7	-0.182478	2.87877	0.861484	1	0.881188
	F2	1.34653	2.33896	0.168522	0.942493	2.543
	F3	-0.514245	4.75146	0.389338	1	0.700159
	SIRT1	-0.0354066	7.24115	0.939563	1	0.975757
	SIRT2	-0.759997	5.42979	0.0807657	0.750864	0.590497
	F5	0.691	4.14405	0.201144	0.98639	1.6144
	SIRT3	0.86966	3.26145	0.240279	1	1.82723
	F8	-0.42798	6.95008	0.240635	1	0.743302
	BDH2	-0.294566	4.97745	0.478994	1	0.815318
	CDC42EP5	0.519172	7.89473	0.0862538	0.769047	1.43313
	CDC42EP4	0.437761	3.67253	0.614456	1	1.3545
	CDC42EP3	-0.291128	6.18351	0.348457	1	0.817263
	CDC42EP2	-0.909696	2.95822	0.287447	1	0.532297
	LOC110079281	-1.29498	1.33313	0.472317	1	0.407543
	CUNH9orf16	1.02698	1.46464	0.655021	1	2.03776
	CDC42EP1	-0.401008	4.9626	0.427906	1	0.757329
	PICK1	-0.0303445	3.8162	1	1	0.979186
	LOC110079283	-0.857345	3.56999	0.187979	0.973734	0.551967
	DLD	-0.416489	6.92375	0.197657	0.984534	0.749246
	LOC110079284	0.445843	3.1887	0.568701	1	1.36211
	MDFI	0.455622	4.4901	0.410463	1	1.37137
	LOC110081598	2.75269	2.23511	0.0181539	0.353325	6.73971
	FH	-0.595676	6.02481	0.0874606	0.77417	0.661734
	LOC110080265	2.63844	0.869973	0.56362	1	6.22658
	LOC110080264	0.0352867	6.75293	0.923038	1	1.02476
	ARL14EPL	0.785993	2.08292	0.478799	1	1.72428
	CCNDBP1	0.129651	3.57448	0.956302	1	1.09403
	LOC110081593	-2.46988	0.84926	1	1	0.180506
	LOC110080260	0.865057	3.72013	0.201079	0.98639	1.82141
	MYCT1	-0.286583	4.78859	0.514404	1	0.819842
	PMS2	-0.223186	3.52107	0.818222	1	0.856671
	DMD	-0.78999	8.3496	0.0081936	0.218133	0.578348
	LOC110079272	-0.307549	5.10039	0.458212	1	0.808013
	CSMD3	-0.3369	4.89474	0.509717	1	0.791741
	CSMD2	-0.109531	2.37804	1	1	0.92689
	CSMD1	0.123007	4.39131	0.825731	1	1.089
	PMS1	-0.344637	5.27706	0.397624	1	0.787506
	LOC110081584	-0.0926225	3.02507	0.9348	1	0.937816
	MDH1	-0.606167	6.9157	0.0882353	0.776899	0.65694
	GK	0.0377569	2.4773	1	1	1.02652
	MDH2	-0.867047	6.58456	0.0200851	0.374354	0.548268
	AADAT	0.685785	5.19419	0.107844	0.820976	1.60858
	TTLL7	0.377979	2.91491	0.649025	1	1.29952
	TTLL6	-0.0795424	0.875246	1	1	0.946358
	TTLL5	-0.374731	4.76249	0.39704	1	0.771249
	TTLL4	0.64747	4.4842	0.186438	0.970876	1.56642
	AADAC	-1.18257	3.69886	0.140365	0.898355	0.440565
	TTLL2	1.86334	0.763335	1	1	3.63849
	TTLL1	-0.0934277	2.48129	1	1	0.937293
	RIMBP2	-3.62992	1.83808	0.0284388	0.458092	0.0807768
	LOC110079260	3.2614	0.983267	0.345431	1	9.58912
	TTLL9	4.07864	1.23719	0.082497	0.755598	16.8963
	TTLL8	1.86334	0.763335	1	1	3.63849
	HDDC2	-1.34493	3.07875	0.07337	0.721742	0.393674
	FAM13B	-0.782777	7.80612	0.0236873	0.412203	0.581247
	FAM13C	0.445588	4.94222	0.283605	1	1.36187
	UBE2D2	-0.00171313	7.67176	1	1	0.998813
	FAM13A	-0.976447	7.47252	0.00349769	0.122613	0.50823
	LOC110080246	-0.340685	3.17695	0.740608	1	0.789666
	UBE2D3	0.0830682	7.75489	0.782337	1	1.05927
	UBE2D1	-0.21008	5.97846	0.51685	1	0.86449
	LOC110080240	0.98193	3.18787	0.277981	1	1.97511
	HDDC3	-0.237253	4.33117	0.690129	1	0.848359
	PMPCB	0.000104733	5.6822	0.982452	1	1.00007
	PMPCA	-0.222445	3.43492	0.757339	1	0.857111
	LOC110079251	0.656447	6.16525	0.077971	0.739229	1.5762
	LOC110080234	2.63545	0.869665	0.56362	1	6.21369
	LOC110081564	-3.38203	0.992335	0.22527	0.991417	0.09592
	LOC110079244	-1.94288	0.768694	1	1	0.260096
	LAG3	4.00923	1.22933	0.202384	0.98639	16.1027
	LOC110081563	-2.05494	1.72704	0.255755	1	0.240658
	IK	-0.0363349	6.73961	0.936431	1	0.975129
	LOC110079246	0.143711	4.77907	0.780656	1	1.10474
	LOC110080238	-1.6928	1.74701	0.231472	1	0.309325
	LOC110079249	-2.04338	0.776356	1	1	0.242595
	LOC110079248	0.651054	3.32426	0.326287	1	1.57032
	VPS33A	-0.234918	5.03918	0.570533	1	0.849733
	UBE2E3	0.0888215	6.74329	0.787554	1	1.0635
	LOC110080236	0.0830655	6.17164	0.853101	1	1.05927
	VPS33B	-0.0528805	5.26159	0.936511	1	0.96401
	UBE2E1	0.211114	5.52964	0.588798	1	1.15758
	LOC110082891	0.95144	3.24342	0.20676	0.991417	1.9338
	EMSY	0.416698	5.69389	0.236036	1	1.33487
	NSMAF	0.846299	4.76411	0.0634265	0.680346	1.79788
	LOC110079242	2.78573	0.884268	0.56362	1	6.89586
	LOC110082886	-3.0525	4.10867	0.0160606	0.326389	0.120533
	LOC110081553	1.78098	3.52466	0.0124507	0.286524	3.4366
	LOC110082889	-2.86093	0.888137	0.56362	1	0.137649
	LOC110080220	-0.153341	3.10556	0.941728	1	0.899166
	LOC110079238	-0.113266	6.45368	0.709611	1	0.924493
	LOC110079237	-0.941292	3.12108	0.236777	1	0.520766
	FBLIM1	0.229612	5.86352	0.494692	1	1.17252
	LOC110080226	-0.333742	4.29621	0.521346	1	0.793476
	LOC110081556	0.229641	2.57459	0.924772	1	1.17254
	LOC110079239	1.95112	0.770582	1	1	3.86674
	ECSCR	-0.439986	4.44284	0.394006	1	0.737142
	DPT	0.627262	7.21796	0.0888821	0.779587	1.54463
	TNFRSF11B	-0.829194	3.37555	0.27049	1	0.562844
	TNFRSF11A	0.825583	3.58844	0.193035	0.981023	1.77225
	NTPCR	-0.0336707	4.25187	1	1	0.976931
	LOC110081550	-2.04338	0.776356	1	1	0.242595
	SOCS2	0.783403	2.6351	0.469213	1	1.72119
	SOCS1	0.674212	3.33698	0.35275	1	1.59573
	PMVK	0.819513	4.33192	0.100244	0.806326	1.76481
	SOCS6	0.389152	5.83808	0.260597	1	1.30962
	LOC110079230	1.07569	1.90303	0.404161	1	2.10773
	SOCS7	0.151006	5.07535	0.717014	1	1.11034
	MDN1	0.339982	7.23233	0.261327	1	1.26574
	SOCS4	-0.00903925	4.54265	1	1	0.993754
	SOCS5	-0.289727	5.9217	0.392409	1	0.818057
	COL28A1	-1.00426	6.24926	0.0201306	0.374429	0.498527
	LOC110079223	-0.753715	4.72961	0.0911872	0.783259	0.593075
	LOC110081543	-0.0685373	5.21123	0.891021	1	0.953604
	KL	-1.27003	1.05435	0.705912	1	0.41465
	LOC110080210	-2.54363	1.35269	0.217071	0.991417	0.17151
	DR1	0.366488	5.63579	0.291136	1	1.28921
	LOC110081541	0.397466	2.19924	0.780138	1	1.31719
	BRPF1	0.120029	4.6319	0.866297	1	1.08676
	LOC110082878	-0.349791	1.3482	1	1	0.784698
	LOC110079227	-2.4091	1.33831	0.19175	0.979657	0.188274
	BDNF	2.80954	2.50001	0.0106557	0.260856	7.01062
	BRPF3	-0.0108465	4.98083	0.972805	1	0.99251
	GFPT2	0.483407	6.65089	0.201352	0.98639	1.39804
	LOC110082873	-0.437004	5.08405	0.276612	1	0.738667
	GFPT1	-0.70368	7.50371	0.0184844	0.357062	0.614004
	LOC110080213	-1.08212	2.51994	0.354579	1	0.472333
	BCDIN3D	0.105692	2.53642	0.922336	1	1.07601
	KY	-2.04338	0.776356	1	1	0.242595
	LOC110070897	0.766825	1.85864	0.63634	1	1.70152
	ZC3HC1	-0.286002	3.26567	0.776238	1	0.820172
	LOC110070896	0.144717	1.64368	1	1	1.10551
	LOC110070899	-1.3973	1.06938	0.705912	1	0.379639
	LOC110070898	-2.18657	1.61849	0.173779	0.950387	0.219674
	TFCP2	0.208355	5.58879	0.67923	1	1.15537
	LOC110070893	0.280868	1.4706	1	1	1.21493
	LOC110070895	-0.502427	1.63574	0.713459	1	0.705918
	LOC110070894	-0.610227	0.948658	1	1	0.655094
	AAK1	-0.103891	4.5218	0.856316	1	0.93052
	MDM2	-0.0843301	5.61766	0.863576	1	0.943222
	MDM4	-0.0390286	7.42079	0.896403	1	0.97331
	LOC110080207	1.86334	0.763335	1	1	3.63849
	LOC110081538	1.85966	0.763021	1	1	3.62922
	LOC110081537	0.89227	2.27941	0.508196	1	1.85609
	LOC110070890	0.451283	2.20387	0.745604	1	1.36726
	LOC110082869	0.748858	2.6149	0.388101	1	1.68046
	MYD88	1.47118	2.70934	0.167753	0.941232	2.77248
	MDM1	-0.693885	2.65028	0.524214	1	0.618187
	LOC110081531	-2.9514	0.895773	0.345431	1	0.129283
	ST6GALNAC1	1.10124	2.36567	0.339656	1	2.14538
	LOC110082867	-1.74752	2.14061	0.264024	1	0.297813
	ST6GALNAC2	-0.247761	3.43354	0.781463	1	0.842203
	SH2D4A	-1.12464	2.82929	0.230112	0.999884	0.458616
	LOC110081536	0.323545	4.39376	0.566155	1	1.2514
	LOC110079215	-1.20333	1.25786	0.63306	1	0.434271
	LOC110080203	-0.3639	3.32218	0.672871	1	0.777061
	LOC110079219	-0.134031	1.07216	1	1	0.911282
	LOC110069893	4.59709	2.68992	0.00688796	0.198277	24.2026
	LOC110070879	5.6027	2.00714	0.0111335	0.267491	48.5938
	LOC110069892	6.24665	2.43874	0.00201522	0.0815217	75.9328
	ATRAID	0.229879	2.48441	1	1	1.17274
	LOC110070878	1.86334	0.763335	1	1	3.63849
	LOC110069891	4.40623	1.38212	0.129041	0.875209	21.2034
	LOC110069890	0.737713	3.0348	0.438591	1	1.66753
	MRPL4	-0.110605	4.3218	0.806865	1	0.926199
	LOC110070885	2.63844	0.869973	0.56362	1	6.22658
	MRPL3	-0.170496	5.11415	0.71336	1	0.888537
	MRPL2	-0.238571	5.32765	0.603222	1	0.847585
	MRPL1	0.274643	4.15577	0.677668	1	1.20969
	LOC110069894	0.441437	1.90801	0.882559	1	1.35796
	LOC110070882	-0.0972336	3.07368	0.947051	1	0.934824
	LOC110070881	-0.163763	2.42311	0.9163	1	0.892693
	MB	1.86334	0.763335	1	1	3.63849
	LOC110070884	-1.75125	2.10665	0.12466	0.867032	0.297044
	LOC110069898	-0.995108	2.26912	0.34618	1	0.501698
	DSE	-0.208447	6.065	0.529427	1	0.865468
	LOC110070883	-0.13784	2.50841	0.914235	1	0.908879
	DGCR8	0.0113402	6.27668	1	1	1.00789
	LOC110070880	-1.55226	1.84256	0.264496	1	0.340976
	MRPL9	0.264146	4.68649	0.530698	1	1.20092
	SPG11	0.320273	7.1172	0.289723	1	1.24857
	DSP	-0.129035	11.1442	0.737798	1	0.914443
	PTCRA	1.95112	0.770582	1	1	3.86674
	LOC110081520	0.232076	3.72757	0.794212	1	1.17452
	EMX2	-2.50302	1.41575	0.163616	0.935508	0.176407
	DST	-0.192263	11.3181	0.614236	1	0.875232
	LOC110081525	1.86334	0.763335	1	1	3.63849
	LOC110081523	-0.743179	6.87187	0.0785498	0.743155	0.597421
	SH2D3C	0.0735305	3.47172	0.943291	1	1.05229
	VPS37C	0.255706	5.35079	0.578449	1	1.19392
	VPS37A	-0.147911	5.67487	0.773714	1	0.902556
	RAD23A	0.0663756	5.48345	0.922979	1	1.04708
	VPS37B	-0.109088	5.00374	0.791633	1	0.927174
	LOC110069882	0.0588528	3.94324	1	1	1.04164
	LOC110069881	-0.431817	3.84962	0.476542	1	0.741328
	RAD23B	-0.0705081	7.51772	0.815764	1	0.952303
	LOC110069880	0.0596734	4.33845	1	1	1.04223
	LOC110070875	0.433104	6.31736	0.207639	0.991417	1.35014
	LOC110069886	-0.713658	3.02993	0.338266	1	0.609772
	LOC110069885	-0.541941	2.35834	0.61658	1	0.686846
	LOC110069884	-0.987274	2.77808	0.236188	1	0.50443
	LOC110070877	-1.3	1.85759	0.364524	1	0.406126
	LOC110069883	0.304957	2.25904	0.927641	1	1.23538
	LOC110070871	1.0023	3.69253	0.10636	0.817039	2.00318
	LOC110070870	-1.85124	2.49226	0.08626	0.769047	0.277153
	LOC110069888	-1.7557	1.15441	0.504859	1	0.29613
	IL1RAPL2	-0.183723	0.882525	1	1	0.880428
	LOC110069887	-0.617276	3.67193	0.345869	1	0.6519
	LOC110070872	0.680597	2.67611	0.517423	1	1.6028
	IL1RAPL1	-0.00600265	3.64332	1	1	0.995848
	LOC110081518	-1.85806	1.22653	0.334731	1	0.275847
	ST6GALNAC3	1.77249	3.36283	0.0248098	0.423481	3.41643
	BDP1	0.0127785	7.73693	0.958476	1	1.0089
	ST6GALNAC4	-0.643033	3.69838	0.304452	1	0.640365
	DTL	0.719372	2.21172	0.570539	1	1.64647
	ST6GALNAC5	0.588753	4.73695	0.379621	1	1.50395
	ST6GALNAC6	0.248806	4.30869	0.61638	1	1.18822
	LOC110081510	-0.675527	4.05243	0.216303	0.991417	0.626103
	RNFT2	0.3289	4.21765	0.608766	1	1.25606
	LOC110082842	0.197578	3.5598	0.852772	1	1.14677
	COL15A1	1.00168	8.46217	0.00675785	0.196769	2.00233
	LOC110082844	2.70959	1.99222	0.0532501	0.63165	6.54137
	SLC47A1	0.476146	3.38785	0.47637	1	1.39102
	LOC110082841	2.18779	3.24846	0.0159087	0.325056	4.55607
	LOC110081511	-0.481016	4.3548	0.307154	1	0.716473
	HSD17B12	-0.247006	6.67519	0.424001	1	0.842643
	LOC110070857	-3.33606	0.98446	0.345431	1	0.0990253
	LOC110069870	-2.9514	0.895773	0.345431	1	0.129283
	HSD17B10	-0.337823	5.13444	0.386664	1	0.791234
	LOC110070859	0.0175889	4.77868	0.974757	1	1.01227
	RNFT1	0.200161	5.00384	0.682341	1	1.14883
	LOC110070858	-0.376107	2.61402	0.74941	1	0.770514
	CUNH9orf85	-0.707137	4.08195	0.304399	1	0.612534
	LOC110069875	1.86334	0.763335	1	1	3.63849
	LOC110069874	-2.43253	2.74053	0.00723229	0.204466	0.18524
	CUNH9orf84	3.12746	0.968281	0.345431	1	8.73897
	LOC110069873	-0.348529	1.97672	0.785327	1	0.785385
	SLITRK2	-0.966988	3.60881	0.136746	0.894768	0.511573
	PTPRZ1	-0.906035	3.89468	0.224664	0.991417	0.53365
	LOC110069879	-3.12969	0.961579	0.345431	1	0.114253
	LOC110070860	-0.323536	3.54107	0.609801	1	0.799109
	SLITRK1	-0.94768	1.76075	0.565113	1	0.518466
	LOC110069877	0.678028	3.55233	0.324	1	1.59995
	LOC110069876	-0.824812	5.47905	0.0582703	0.657071	0.564556
	SLITRK3	0.639695	2.47029	0.605517	1	1.558
	LOC110082839	4.27801	1.31522	0.0914858	0.783259	19.4004
	SLITRK5	0.4049	2.09501	0.822708	1	1.324
	LOC110081506	-1.94288	0.768694	1	1	0.260096
	LOC110081504	-2.77247	0.88053	0.56362	1	0.146354
	AAMP	-0.255031	4.95737	0.674209	1	0.837969
	LOC110082838	0.738532	1.61494	0.898128	1	1.66848
	LINGO2	0.934145	2.04309	0.606093	1	1.91076
	LINGO1	-1.19611	1.34643	0.66149	1	0.436452
	DUT	0.0798897	3.85477	0.91995	1	1.05694
	LINGO4	-0.0456105	3.75283	1	1	0.96888
	LINGO3	-0.228919	2.31922	0.902107	1	0.853274
	LOC110070849	1.86334	0.763335	1	1	3.63849
	LOC110070846	-0.404008	3.44736	0.546326	1	0.755756
	BAIAP2	-0.176345	5.69084	0.6269	1	0.884942
	LOC110070845	0.369438	1.30131	1	1	1.29185
	LOC110070847	3.33592	1.90124	0.103916	0.81286	10.0975
	LOC110069864	2.90343	1.64683	0.113272	0.836978	7.48203
	LOC110070853	2.63844	0.869973	0.56362	1	6.22658
	LOC110070852	0.0597209	4.16165	0.925697	1	1.04226
	CUNH9orf72	-0.00521542	5.46672	1	1	0.996391
	LOC110070854	-1.70858	2.90918	0.0401031	0.544425	0.30596
	PC	-0.441967	4.07215	0.459766	1	0.73613
	LOC110069868	-3.67909	1.85098	0.0381308	0.530831	0.0780701
	CUNH9orf78	-0.141676	3.95589	0.866375	1	0.906466
	LOC110069865	-1.74598	4.02079	0.0116797	0.275226	0.298131
	LOC110070850	-0.974106	1.03918	1	1	0.509055
	VIPAS39	0.0859852	3.81036	0.956028	1	1.06141
	PABPC1L	-1.44061	1.07729	0.705912	1	0.368413
	MDGA2	1.48002	1.97434	0.278216	1	2.78953
	MDGA1	-1.07317	4.40692	0.0336703	0.504133	0.475274
	SPG21	-0.175259	5.52571	0.65631	1	0.885608
	SPG20	0.111257	4.9683	0.793043	1	1.08017
	LOC110082943	-0.166576	5.11243	0.710622	1	0.890955
	RETREG3	-0.0271973	5.98372	0.951924	1	0.981325
	RGSL1	-0.700494	1.83205	0.653474	1	0.615361
	RTCA	-0.00432322	4.12205	1	1	0.997008
	RTCB	0.135063	5.90243	0.716774	1	1.09814
	LOC110070959	0.905086	1.65971	0.563624	1	1.87266
	TXNDC11	0.0900168	4.96664	0.874001	1	1.06438
	TXNDC12	0.238101	5.85475	0.501246	1	1.17944
	LOC110070956	-1.86187	1.81844	0.30163	1	0.275119
	LOC110069970	1.2502	1.07339	0.705912	1	2.37874
	TXNDC15	0.225412	5.324	0.604345	1	1.16911
	TXNDC16	-0.159054	2.83358	0.856679	1	0.895612
	LOC110070958	-0.0954214	3.27884	0.947943	1	0.935999
	TXNDC17	0.294927	5.58364	0.482376	1	1.22682
	UBE2L3	0.0705717	7.21604	0.828488	1	1.05013
	LOC110070962	0.496802	4.01581	0.42526	1	1.41108
	LOC110069973	0.091047	1.06406	1	1	1.06514
	LOC110069972	-0.0142948	2.92724	1	1	0.990141
	LOC110069971	-1.10131	1.05415	1	1	0.466092
	LOC110069978	1.86334	0.763335	1	1	3.63849
	LOC110069976	0.866253	4.39429	0.0772152	0.735542	1.82292
	LOC110069975	-0.108832	3.85166	0.95811	1	0.927339
	LOC110081604	2.63246	0.869357	0.56362	1	6.20084
	LOC110069979	-1.08048	3.38289	0.147919	0.915961	0.472872
	LOC110081609	0.181089	2.31774	1	1	1.13374
	LOC110082937	0.849249	7.36493	0.031435	0.483917	1.80156
	LOC110082930	0.354575	3.83119	0.577729	1	1.27861
	SLC34A2	-0.992484	1.23601	0.777421	1	0.502612
	LOC110082931	1.86334	0.763335	1	1	3.63849
	ENTPD1	0.856545	4.29555	0.0899209	0.781857	1.8107
	ENTPD2	-0.586974	7.79946	0.0420645	0.560834	0.665738
	ENTPD3	0.121278	4.45404	0.832487	1	1.0877
	ENTPD4	-0.164465	5.35511	0.682031	1	0.89226
	ENTPD5	0.16717	3.52832	0.843975	1	1.12285
	ENTPD6	0.285436	6.40929	0.368424	1	1.21878
	ENTPD7	0.706956	4.47167	0.135192	0.892804	1.63236
	ENTPD8	-2.62322	2.9341	0.023747	0.412759	0.162305
	LOC110070944	1.85966	0.763021	1	1	3.62922
	ASRGL1	-0.894299	3.16741	0.199278	0.985303	0.538009
	LOC110070947	-2.04338	0.776356	1	1	0.242595
	LOC110070946	0.073628	2.5924	1	1	1.05236
	LOC110069961	0.981888	3.16063	0.204669	0.989785	1.97505
	LOC110069960	1.19402	1.60842	0.561443	1	2.28789
	LOC110069967	-0.0469153	4.23776	0.926907	1	0.968004
	LOC110069966	0.104074	2.60085	1	1	1.0748
	LOC110069965	0.211274	3.74472	0.731965	1	1.15771
	LOC110069964	-0.708557	4.89565	0.0780939	0.739617	0.611932
	LOC110082929	3.78242	1.14784	0.15911	0.927596	13.7601
	LOC110069969	-0.669508	0.971258	1	1	0.628721
	DXO	-0.0194972	2.71663	1	1	0.986577
	LAP3	0.136824	5.86117	0.69091	1	1.09948
	LOC110069968	-1.94288	0.768694	1	1	0.260096
	LOC110082921	-1.7538	0.752711	1	1	0.29652
	LOC110070938	0.765887	1.26124	1	1	1.70042
	LOC110070937	-2.04338	0.776356	1	1	0.242595
	LOC110070939	1.00903	2.31195	0.404375	1	2.01255
	RTF1	-0.202654	7.18263	0.537483	1	0.868951
	MST1R	0.0473343	5.02546	0.955956	1	1.03335
	LOC110070934	1.84606	1.25596	0.603762	1	3.59517
	UBE2J2	-0.0850553	4.06219	0.900601	1	0.942748
	LOC110070933	-0.411676	2.75067	0.689768	1	0.751749
	OSGEP	-1.01743	1.83185	0.473532	1	0.493997
	LOC110070936	1.85966	0.763021	1	1	3.62922
	LOC110070935	-1.24759	2.94071	0.185017	0.969527	0.421152
	UBE2J1	0.10612	5.31987	0.770769	1	1.07633
	LOC110069952	1.07003	2.36484	0.414372	1	2.09948
	LOC110070941	0.36079	3.50227	0.686734	1	1.28413
	LOC110070940	1.2609	3.62881	0.0457686	0.582242	2.39645
	LOC110069951	3.32472	0.990335	0.345431	1	10.0194
	LOC110070943	-0.697097	1.92481	0.637373	1	0.616812
	LOC110069950	1.86334	0.763335	1	1	3.63849
	LOC110070942	0.147597	3.47909	0.858198	1	1.10772
	SPATA5L1	-0.112242	3.18122	0.872717	1	0.925149
	LARS	0.252057	5.80746	0.49074	1	1.1909
	LOC110069955	1.86334	0.763335	1	1	3.63849
	LOC110069954	-0.0407341	4.47492	1	1	0.97216
	SWI5	0.253731	2.95319	0.720454	1	1.19229
	LOC110082916	-0.310006	1.45699	1	1	0.806638
	DYM	-0.116619	5.89979	0.757064	1	0.922346
	LOC110069958	-1.37178	3.13566	0.157632	0.92735	0.386414
	LOC110069957	1.86334	0.763335	1	1	3.63849
	AAR2	0.644596	4.74775	0.169223	0.944287	1.5633
	LOC110070927	-0.445381	2.35031	0.716273	1	0.73439
	LOC110070926	1.00269	3.44341	0.131627	0.883489	2.00373
	LOC110070928	2.24689	1.24823	0.390222	1	4.74657
	LOC110070923	-0.319624	2.34036	0.816203	1	0.801278
	WAPL	0.153873	7.52043	0.594634	1	1.11255
	LOC110070925	-0.382783	3.19353	0.667904	1	0.766957
	LOC110069941	0.46065	2.0452	0.785888	1	1.37616
	LOC110070932	0.143946	3.10829	0.870774	1	1.10492
	TG	1.64563	3.10896	0.0203627	0.37719	3.12884
	LOC110070931	-0.495486	2.8245	0.592963	1	0.709323
	LOC110069945	-0.747414	2.2003	0.527447	1	0.59567
	TH	-1.7538	0.752711	1	1	0.29652
	LOC110069944	0.269419	1.34486	1	1	1.20532
	LOC110069942	-1.6774	1.70817	0.418092	1	0.312646
	LOC110069949	-0.0912845	1.91711	1	1	0.938687
	LOC110069948	-0.125888	4.19297	0.811945	1	0.91644
	LOC110069947	-3.54025	1.00752	0.22527	0.991417	0.0859565
	LOC110069946	0.496336	2.36167	0.686903	1	1.41063
	RETREG2	-0.0585107	5.43865	0.875122	1	0.960255
	LOC110082902	1.80996	1.23456	0.551034	1	3.50634
	RETREG1	0.109469	6.65663	0.74889	1	1.07883
	LOC110082903	-3.44154	1.04475	0.22527	0.991417	0.0920435
	AARS	0.122853	5.76604	0.727505	1	1.08889
	PCSK2	-0.351428	3.24707	0.696359	1	0.783808
	PCSK1	0.109545	0.859604	1	1	1.07889
	LOC110082900	-1.99576	2.01968	0.145659	0.91121	0.250735
	TNFRSF13B	1.95112	0.770582	1	1	3.86674
	LOC110070919	-0.621275	3.02172	0.492734	1	0.650096
	SLC7A14	-2.714	1.88368	0.0612688	0.669946	0.152406
	PCSK9	-0.210355	4.17722	0.771783	1	0.864324
	PCSK7	-0.524063	3.21123	0.444329	1	0.695411
	WASL	-0.139156	7.37769	0.662836	1	0.908051
	PCSK6	-0.979325	5.69671	0.00976502	0.244695	0.507217
	IER3IP1	-0.133262	6.10351	0.696115	1	0.911767
	LOC110070912	0.0248174	2.41285	1	1	1.01735
	AATF	0.0218869	4.71916	1	1	1.01529
	PCSK5	0.042587	6.62537	0.90535	1	1.02996
	PCSK4	-2.92522	0.938877	0.56362	1	0.13165
	CLYBL	-0.34886	3.05833	0.688481	1	0.785204
	LOC110070914	1.86334	0.763335	1	1	3.63849
	LOC110070913	0.220113	2.62232	0.855461	1	1.16482
	LOC110069930	0.574635	3.05936	0.53285	1	1.4893
	MYDGF	-0.327158	5.78032	0.378865	1	0.797105
	IMMP2L	-0.936474	2.08117	0.514502	1	0.522508
	GNGT2	-0.183723	0.882525	1	1	0.880428
	HYAL1	0.232594	3.3796	0.746821	1	1.17495
	LOC110069932	3.12998	0.968583	0.345431	1	8.75425
	HYAL2	0.121163	6.33827	0.707636	1	1.08761
	HYAL3	1.53811	2.81077	0.109537	0.825388	2.90415
	ENC1	-0.0342994	5.70783	0.970711	1	0.976506
	LOC110069935	5.67445	2.05282	0.0119871	0.280144	51.0715
	L3HYPDH	-0.140452	4.67781	0.808362	1	0.907235
	AASS	-0.0169779	5.3197	1	1	0.988301
	LOC110069939	0.364428	1.94808	0.865081	1	1.28737
	WARS	-0.119069	5.23077	0.754149	1	0.920782
	MRPS2	-0.233435	4.87303	0.692808	1	0.850607
	MRPS7	-0.76966	4.22589	0.134152	0.890496	0.586556
	MRPS6	0.305083	5.04313	0.456037	1	1.23549
	MRPS5	-0.491328	5.18451	0.263536	1	0.71137
	LAT2	1.25009	2.45281	0.33218	1	2.37857
	ENAH	0.11493	8.40823	0.721486	1	1.08292
	IMMP1L	0.374839	2.78619	0.610593	1	1.29669
	MRPS9	0.641115	5.35496	0.0809716	0.750864	1.55953
	LOC110070910	0.196521	5.63527	0.610086	1	1.14593
	LOC110069923	0.00823444	0.882398	1	1	1.00572
	ENAM	-4.91784	5.01602	0.00123935	0.058535	0.0330813
	LOC110069920	0.774766	1.24684	0.778857	1	1.71091
	G2E3	1.24945	4.16687	0.0245361	0.420798	2.37751
	LOC110069927	0.144978	1.29142	1	1	1.10571
	LOC110069925	-0.26802	1.12004	1	1	0.830459
	LOC110069924	2.63844	0.869973	0.56362	1	6.22658
	LOC110069929	0.366876	2.99868	0.70754	1	1.28956
	LOC110069928	-1.09664	2.36769	0.37043	1	0.467604
	PNCK	-1.74474	4.28696	0.00119543	0.0569073	0.298387
[truncated: 16,043 more rows]
